# Supplementary material
Source: publisher figshare collection journal article supplement (https://wiley.figshare.com/articles/dataset/_/3521627)
Supplement: Supplementary file 1 [file 1]

W. K. KELLOGG BIOLOGICAL STATION  
TELEPHONE (616) 671-5117

HICKORY CORNERS • MICHIGAN • 49060-9516  
FAX (616) 671-2351; 199-2351 (CAMPUS)

NOV 8 1993

### KBS Geostatistics Programs

KBS no longer distributes on diskette the Geostat programs noted in Robertson (1987) [Robertson, G.P. 1987. Geostatistics in ecology: interpolating with known variance. Ecology 68:744-748]. If you need a copy of the Robertson (1987) programs for documentary purposes you should refer to the microfiche archives of the Ecological Society of America (consult a recent issue of Ecology) or write the author.

Thanks for your interest; we're sorry to be unable to meet your request. You may wish to write to the addresses below for information on other permanently supported programs (we do not endorse these programs, only note their availability):

### U.S. EPA (Environmental Protection Agency)

#### Geo-EAS (Geostatistical Environmental Analysis Software)

U.S. Environmental Protection Agency  
Attn: Evan Englund  
Environmental Monitoring Systems Laboratory  
Las Vegas, NV 89193-3478  
USA

### Gamma Design Software

#### GS+: Geostatistics for the Biological, Environmental, and Agronomic Sciences

Gamma Design Software  
P.O. Box 201  
Plainwell, MI 49080-0201  
USA

ESA Supplementary Publication Service

Document No. ESPS 8733

Fortran programs for: Semivariogram analysis  
Punctual krig analysis  
Block krig analysis

Supplement to

"Geostatistics in ecology: interpolating with known variance"

by

G. Philip Robertson

ECOLOGY 68 (1987)

File Semivar.hlp; to accompany

Program Semivar.for,  
Semivariogram Analysis  
Version 11.10.86 Copyright (c) 1986 G.P. Robertson

The correct citation for this program is  
Robertson, G.P. 1987. Geostatistics in ecology: interpolating  
with known variance. Ecology 68:

Later releases of this program available from: Computer Services Laboratory  
W.K. Kellogg Biol. Station  
Michigan State University  
Hickory Corners, MI 49060.

#### Program parameters:

1. Hardware requirements. This version was written in Microsoft Fortran version 3.3 designed to run under the IBM MS-DOS 2.0+ operating system. Compilation by other compilers compatible with the ANSI 77 standard should be possible.

2. Data Input. Data is read into the program as ASCII characters in free format from a user-specified file. The first 4 lines of the input file are treated as header lines -- they should not contain data. If the first characters of the third line are numeric, they are assumed to represent the number of columns in each data record. A sample header:

```
Line 1: File xxxxx.prn from supporting files xxyyy.ext and xxxyy.ext;
Line 2: Small grid samples taken 5/19.....
Line 3: 15 columns: Sample#, Xcor, Ycor, z1,z2,z3,z4,z5,
Line 4:         z6,z7,z8,z9,z10,z11,z12.
Line 5: 1 0 15 4.3 2.11 .0003 -99. 2.3 3 5 4 3 2 2 1.9997
```

If the column no. value on line 3 is not correct or if there are different numbers of columns in any row, the data will not be read correctly and calculations will be incorrect. Missing values are represented by the value -99. Data size limitations are 15 columns x 1000 rows, though redimensioning key variables will allow indefinite input file sizes.

3. Output. Primitive graphics output is written to the screen during program execution and text and graphics output is written to a file of the user's specification. Output data is ASCII format and can be subsequently printed or read into another program.

#### 4. User-specified prompts:

- a) Semivar menu;
  - a) 1-dimensional semivariogram uses as input data a single vector; do not use a 2-coordinate dataset with this subprogram -- instead specify the 2-dimensional semivariogram and set the y-range to a single value (e.g. 10 - 10);
  - b) 2-dimensional semivariogram uses as input data a grid of points within the dimensions of the overall grid as specified by the user;
  - c) read data file; see limitations above;
  - d) help; this output;
  - e) exit program;
- c) input file name; conform to MSDOS convention;
- d) run title; as desired for labeling output graphs; 20 char. max;
- e) x,z or x,y,z columns: columns in which x coordinates, y coordinates, and active z-value can be found; values for x and y coordinates should not be >5 significant figures each;
- f) z-label: as desired for labeling output, 16 char. max;
- g) use subset of data set; to use partial grid;
- h) transform z-value; if requested, z is logn-transformed with the option of adding a constant to each value before transforming; because of the discontinuous nature of this distribution over the range <-1 to >1, all values <1.0 are ignored for the duration of the analysis; note that the transformation lasts only until the next Semivar menu, and that statistics output may give back-transformed values -- see note below;
- i) test for anisotropy; if yes,
  - i) no. of directions (<16);
  - ii) direction and tolerance for each; direction = degrees from north (0-360) that any given pair of points must align along in order to be included in the analysis; tolerance = +/- degrees (0-90) away from the given

direction that points may diverge from the direction but still be included in the analysis; isotropic analysis = any direction +/- 90 degrees;

j) specify output file; N = results are not read to output file, appear on screen only;

A = appends results to last output file opened;

f = name of new output file; if file exists, can write over it or append to it as specified;

N.B. Note that statistics on the output file apply only to points used for that specific analysis and not to the entire data set, and that if values were ln-transformed, means and variance estimates are back-transformed using either standard or Haan (1977) methods, as specified by earlier prompt. Standard mean =  $\exp([\text{mean of logn values}] - A)$ ; var =  $\exp[\text{var}(\text{logn values})]$ . Haan (1977) mean =  $\exp([\text{mean of logn values}] + 0.5 * \text{var of logn values}) - A$ ; var =  $([\text{mean of untransformed values}]^2) * (\exp[\text{var of logn values}] - 1)$ . Where A = constant added to original values before ln transformation in order to bring original values to >1.0 before ln transformation. (See Haan, C.T. 1977. Chapter 6. Some continuous probability distributions. Statistical Methods in Hydrology. The Iowa State Univ. Press, Ames, Iowa.)

\$storage:2

PROGRAM SEMIVAR

C Version 11.10.86  
 C Copyright (c) 1986 G.P. Robertson. All rights reserved.  
 C  
 C The correct citation for this program is Robertson, G.P. 1987.  
 C Geostatistics in ecology: interpolating with known variance.  
 C Ecology 68:(in press).  
 C  
 C This program is being maintained at the Computer Services Laboratory  
 C W.K. Kellogg Biological Station  
 C Michigan State University  
 C Hickory Corners, MI 49060.  
 C  
 C Please report significant bugs and well-documented enhancements  
 C to this address for inclusion in later versions.  
 C  
 C Documentation for users appears in file Semivar.hlp.  
 C  
 C Subroutines: SEM1D, SEM2D, SETUP, GETOUT, STATS, DATREAD,  
 C TEXTOUT, PRIMGRPH

C-----Variable list

| C NAME        | FUNCTION                                                 |
|---------------|----------------------------------------------------------|
| C ----        | -----                                                    |
| C FILNAM      | input data file                                          |
| C OUTFIL      | file where output data sent                              |
| C PRESOUT     | last output file named (used in appending)               |
| C FTITLE      | run title                                                |
| C ZLABEL      | z-variable title                                         |
| C XCOL        | column in filnam with x-coordinate values                |
| C YCOL        | column with y-coordinate values                          |
| C ZCOL        | column with z-coordinate values                          |
| C XMAX        | greatest x-coordinate                                    |
| C XMIN        | least x-coordinate                                       |
| C YMAX        | greatest y-coordinate                                    |
| C YMIN        | least y-coordinate                                       |
| C DIR(15)     | directions from north to evaluate anisotropy             |
| C TOL(15)     | tolerances (+/- degrees) for closeness of pair to dir(i) |
| C DIST(1000)  | average distance for all lags                            |
| C NCPL(1000)  | number of pairs                                          |
| C GAMA(1000)  | gammas                                                   |
| C DRIFT(1000) | drift                                                    |
| C LOG         | log transformation? (logical)                            |
| C HAAN        | back-transform using Haan (1977) (logical)               |
| C MLAG        | greatest possible lag for given input data               |
| C NLAG        | user's choice for lag to be used.                        |
| C NSTP        | user's choice for step size                              |
| C NR          | number of valid data elements                            |
| C VALUE       | If Semivariogram is 1D this is the linear coordinate     |
| C AMEAN       | mean of given input data NB: if LOG, not backtransformed |
| C VAR         | variance of given input data                             |
| C STDEV       | standard deviation of given input data                   |
| C CVA         | C.V. for given input data                                |
| C CSKEW       | skewness for given input data                            |
| C CKURT       | kurtosis for given input data                            |

INTEGER XCOL,YCOL,ZCOL  
 LOGICAL THERE,LOG,HAAN,READIN,CALC,GRAPH  
 CHARACTER\*1 YORN,BS  
 CHARACTER\*32 FILNAM,OUTFIL,PRESOUT  
 CHARACTER\*20 FTITLE,ZLABEL  
 CHARACTER\*1 HEAD1(79),HEAD2(79),HEAD3(79),HEAD4(79),LINE(79)

COMMON/PGMPARAM/NDIM,NR,NLAG,MLAG,NSTP,LOG,A,HAAN,  
 + XMAX,XMIN,YMAX,YMIN,XCOL,YCOL,ZCOL,  
 + ZLABEL,GRAPH  
 COMMON/FILINFO/FILNAM,OUTFIL,PRESOUT,FTITLE,  
 + NCOL,NROW,HEAD1,HEAD2,HEAD3,HEAD4

C-----Write menu header

DO 2 I=1,5  
 WRITE(\*,\*)

```

2  CONTINUE
   WRITE(*,*)'Program Semivar'
   WRITE(*,*)' Semivariogram Analysis'
   WRITE(*,*)' Version 11.10.86'
   WRITE(*,*)' '
   WRITE(*,*)'See file Semivar.hlp and source code listing'
   WRITE(*,*)' for documentation and copyright information'
   WRITE(*,*)' (//1X,A,$)')'Hit <return> to continue.....'
   READ(*, '(A1)') YORN
   WRITE(*, '(//////////1X)')

C-----Give user menu screen
   NLAG=0
   PRESOUT='NONE'
5  WRITE(*,*)
   CALC=.FALSE.
   WRITE(*,*) 'Semivar Menu'
   IF (.NOT.READIN) THEN
     WRITE(*,*) 'No active input file'
   ELSE
     WRITE(*,200) FILNAM
     WRITE(*,205) NCOL,NROW
     WRITE(*,*) 'File header:'
     WRITE(*, '(1X,79A1)') (HEAD1(I),I=1,79)
     WRITE(*, '(1X,79A1)') (HEAD2(I),I=1,79)
     WRITE(*, '(1X,79A1)') (HEAD3(I),I=1,79)
     WRITE(*, '(1X,79A1)') (HEAD4(I),I=1,79)
   ENDIF
200  FORMAT(1X,'Current file: ',A32)
205  FORMAT(15X,I2,' columns, ',I4,' rows')

   WRITE(*,*)
   WRITE(*,*)'Choose a function:'
   WRITE(*, '(3X,A)')'1. 1-dimensional Semivariogram'
   WRITE(*, '(3X,A)')'2. 2-dimensional Semivariogram'
   WRITE(*, '(3X,A)')'3. Read data file'
   WRITE(*, '(3X,A)')'4. Help'
   WRITE(*, '(3X,A)')'5. End Program'
   WRITE(*,*)
50  WRITE(*, '(2X,A)')' Enter choice: '
   READ(*, '(BN,I1)',ERR=99)NDIM

C-----Act on choice
   IF ((NDIM.EQ.1).OR.(NDIM.EQ.2)) THEN
     WRITE(*,*)
     IF (.NOT.READIN) CALL DATREAD(READIN)
     IF (.NOT.READIN) GOTO 5
     IF (NDIM.EQ.1) CALL SEM1D
     IF (NDIM.EQ.2) CALL SEM2D
     CALC=.TRUE.
   ELSEIF (NDIM.EQ.3) THEN
     WRITE(*,*)
     CALL DATREAD(READIN)
     CALC=.TRUE.
   ELSEIF (NDIM.EQ.4) THEN
     C-----SEE IF HELP FILE PRESENT
     INQUIRE(FILE='SEMIVAR.HLP', EXIST=THEORE)
     IF (THEORE) THEN
       DO 12 I=1,10
         WRITE(*,*)
12      CONTINUE
       OPEN (7,FILE='SEMIVAR.HLP',STATUS='OLD')
       DO 11 J=1,24
         READ (7,'(79A1)',END=20) (LINE(I),I=1,79)
         WRITE(*, '(1X,79A1)') (LINE(I),I=1,79)
11      CONTINUE
       WRITE(*, '(20X,A,$)')' (.....hit <return> to continue.....)'
       READ(*, '(A1)') YORN
       GOTO 10
20      CLOSE(7)
       WRITE(*, '(//1X,A,$)')' (.....hit <return> to continue.....)'
       READ(*, '(A1)') YORN
       WRITE(*, '(//////////1X)')
       CALC=.TRUE.
     ELSE
       WRITE(*,*)' file Semivar.hlp not in directory...'
     ENDIF

```

```

ELSEIF (NDIM.EQ.5) THEN
  WRITE(*,*)
  WRITE(*,*) 'Normal termination;'
  WRITE(*,*) 'Exit Semivar.'
  GOTO 2000
ELSE
  WRITE(*,*) '  choose 1-5 only...'
ENDIF

C-----After act on choice, replay menu
IF (CALC) THEN
  GOTO 5
ELSE
  GOTO 50
ENDIF

C-----Error trapping
99  WRITE(*,*) '  try again...'
    GOTO 5

2000 END

C*****
C*****
SUBROUTINE SEM1D
C  1-dimensional semivariogram

LOGICAL    LOG,GRAPH,HAAN,SAS
INTEGER    SIZE,XCOL,YCOL,ZCOL
CHARACTER*32 FILNAM,OUTFIL,PRESOUT
CHARACTER*20 FTITLE,ZLABEL
CHARACTER*1 HEAD1(79),HEAD2(79),HEAD3(79),HEAD4(79),Q

COMMON/DATACOL/X(1000),Y(1000),Z(1000)
COMMON/VARIDAT/NCPL(1000),DIST(1000),GAMA(1000),DRIFT(1000),
+   DIR(15),TOL(15)
COMMON/FILINFO/FILNAM,OUTFIL,PRESOUT,FTITLE,
+   NCOL,NROW,HEAD1,HEAD2,HEAD3,HEAD4
COMMON/DSTATS/AMEAN,AVAR,NN,STDEV,CVA,CSKEW,CKURT,
+   SESKEW,SEKURT
COMMON/PGMPARAM/NDIM,NR,NLAG,MLAG,NSTP,LOG,A,HAAN,
+   XMAX,XMIN,YMAX,YMIN,XCOL,YCOL,ZCOL,
+   ZLABEL,GRAPH

C-----Get X,Z Vectors, Log-transform
CALL SETUP
IF(NR.LT.3) THEN
  WRITE(*,101) NR
101  FORMAT(' too few valid points (,I1,') in file...'
  RETURN
ENDIF

C-----Determine max and mins for coordinates
XMIN=X(1)
XMAX=X(1)
DO 10 I=2,NR
  IF (X(I).LT.XMIN) XMIN=X(I)
  IF (X(I).GT.XMAX) XMAX=X(I)
10  CONTINUE

WRITE(*,*)'Transect bounds:'
WRITE(*, '(4X,A3,F11.3,A3,F11.3)') 'X: ',XMIN,' ',XMAX

C-----See if user wants only a subset of data set
15  WRITE(*, '(A32,$)') ' Use subset of transect? (y/n): '
    READ(*, '(A1)') YORN
    IF ((YORN.EQ.'Y').OR.(YORN.EQ.'y')) THEN
      WRITE(*, '(A26,$)') 'Enter min X and max X: '
      READ(*,*)TXMIN,TXMAX
      K=0
      DO 20 L=1,NR
        IF ((X(L).GE.TXMIN).AND.(X(L).LE.TXMAX)) THEN
          K=K+1
          X(K)=X(L)
          Z(K)=Z(L)

```

```

20      CONTINUE
      IF (K.LT.3) THEN
150         WRITE(*,150) K
            FORMAT(4X,'too few data (' ,I1,') within range...')
            WRITE(*,*)
            GOTO 15
      ENDIF
      XMAX=TXMAX
      XMIN=TXMIN
      NR=K
      ELSEIF ((YORN.NE.'N').AND.(YORN.NE.'n')) THEN
         WRITE(*,*) '      answer either y or n...'
         GOTO 15
      ENDIF

```

C-----Determine the maximum possible lag  
MLAG=NINT(ABS(XMAX-XMIN)+0.5)

C-----See if user wants a different lag

```
35 WRITE(*,*)
WRITE(*,'(A25,I4,)' )' Largest lag interval is ',MLAG
WRITE(*,'(A33,$)' )' Enter maximum lag (integer): '
READ(*,*) NLAG
IF (NLAG.GT.MLAG) NLAG=MLAG
```

C-----Ask for step size

```
37 WRITE(*, '(A31,$)') ' Enter step size (integer): '
   READ(*,*,ERR=600) NSTP
   WRITE(*,*)
```

C-----See if NLAG>NSTP

```
IF(NLAG.LE.NSTP) THEN
  WRITE(*,*)'    step must be less than maximum lag ....'
  GOTO 35
ENDIF
```

```
C-----Initialize main variables
```

```
DO 38 I=1,NLAG
  NCPL(I)=0
  DIST(I)=0.0
  GAMA(I)=0.0
  DRIFT(I)=0.0
```

38 CONTINUE

C-----Ask for output file

CALL GETOUT(SAS)

### C-----Semivariogram analysis

```
WRITE(*,*)  
WRITE(*,'(A38\)' ) '...calculating transect point '  
Q=CHAR(8)  
WRITE(*,990)
```

```
990  FORMAT( '          '\
```

```
DO 40 J=1,NR-1
  WRITE(*,991) Q,Q,Q,Q,Q,Q,Q,Q,Q,Q,Q,Q,J,NR-1
```

```
991      FORMAT(11A1,I4,' of ',I4\)
```

```
DO 45 I=J+1,NR
H=ABS(X(J)-X(I))
IF (H.LT.1.0E-6*NSTP) GOTO 45
IF (H.GT.NLAG) GOTO 45
M=(INT((H/NSTP)+0.5))+1
NCPL(M)=NCPL(M)+1
DIST(M)=DIST(M)+H
DZ=Z(I)-Z(J)
DRIFT(M)=DRIFT(M)+DZ
GAMA(M)=GAMA(M)+0.5*(DZ**2)
```

45 CONTINUE

```

40  CONTINUE
    WRITE(*,*)

```

```
DO 50 I=1,NLAG
  CP=FLOAT(NCPL(I))
  IF (CP.EQ.0.0) GOTO 50
  DIST(I)=DIST(I)/CP
  DRIFT(I)=DRIFT(I)/CP
  GAMA(I)=GAMA(I)/CP
```

50 CONTINUE

C-----Start output procedures

```
CALL STATS(Z,NR)
CALL PRIMGRPH(0,0)
IF (OUTFIL.NE.'NONE') CALL TEXTOUT(0,SAS)

RETURN
```

C-----Error trapping

```
600 WRITE(*,*)' ...entries must be integers;'
GOTO 37

END
```

C\*\*\*\*\*  
C\*\*\*\*\*

SUBROUTINE SEM2D

C 2-d Semivariogram analysis

```
LOGICAL LOG,INCL(1000),GRAPH,HAAN,SAS
INTEGER SEC(8),XCOL,YCOL,ZCOL
REAL ZSTAT(1000)
REAL*8 CDIR,CTOL,SDIR,DX,DY,DHS,H,DTST,PI
CHARACTER*1 YORN,Q
CHARACTER*20 ZLABEL,FTITLE
CHARACTER*32 FILNAM,OUTFIL,PRESOUT
CHARACTER*1 HEAD1(79),HEAD2(79),HEAD3(79),HEAD4(79)
```

C-----Common Blocks

```
COMMON/DATACOL/X(1000),Y(1000),Z(1000)
COMMON/VARIDAT/NCPL(1000),DIST(1000),GAMA(1000),DRIFT(1000),
+ DIR(15),TOL(15)
COMMON/FILINFO/FILNAM,OUTFIL,PRESOUT,FTITLE,
+ NCOL,NROW,HEAD1,HEAD2,HEAD3,HEAD4
COMMON/DSTATS/AMEAN,AVAR,NN,STDEV,CVA,CSKEW,CKURT,
+ SESKEW,SEKURT
COMMON/PGMPARAM/NDIM,NR,NLAG,MLAG,NSTP,LOG,A,HAAN,
+ XMAX,XMIN,YMAX,YMIN,XCOL,YCOL,ZCOL,
+ ZLABEL,GRAPH
```

C-----See if run parameters should be reset

```
YORN=' '
WRITE(*,*)
IF(NLAG.GT.0) THEN
  WRITE(*,705)
705 FORMAT(' Reset run parameters? (y/n): ', $)
51 READ(*,'(A1)') YORN
IF((YORN.EQ.'N').OR.(YORN.EQ.'n')) THEN
```

C-----See if user wants a different maximum lag

```
50 WRITE(*,*)
  WRITE(*,'(A14,)' )' Lag interval maximum: ',MLAG
  WRITE(*,'(A14,)' )' last: ',NLAG
  WRITE(*,'(A, $)') ' new: '
55 READ(*,ERR=655) NLAG
  IF(NLAG.LE.NSTP) THEN
    WRITE(*,658) NSTP
658 FORMAT(1X,' .....lag must be >step (',14,
  '); respecify: ', $)
    GOTO 55
  ENDIF
  GOTO 61
655 WRITE(*,656)
656 FORMAT(1X,' ... entry error; respecify: ', $)
  GOTO 55
ELSEIF((YORN.NE.'Y').AND.(YORN.NE.'y')) THEN
  WRITE(*,'(1X,A, $)')'... answer either y or n: '
  GOTO 51
ENDIF
ENDIF
```

C-----Get X,Y,Z vectors, log-transform if necessary

```
CALL SETUP
IF(NR.LT.3) THEN
  WRITE(*,101) NR
101 FORMAT(' too few valid points (',11,') in file...'
```

```

      RETURN
    ENDIF

```

C-----Determine max and min coordinates for active dataset

```

XMIN=X(1)
XMAX=X(1)
YMIN=Y(1)
YMAX=Y(1)
DO 5 I=2,NR
  IF (X(I).LT.XMIN) XMIN=X(I)
  IF (X(I).GT.XMAX) XMAX=X(I)
  IF (Y(I).LT.YMIN) YMIN=Y(I)
  IF (Y(I).GT.YMAX) YMAX=Y(I)
5  CONTINUE
WRITE(*,*)'X-Y Bounds:'
WRITE(*, '(5X,A3,F11.3,A3,F11.3)')'X: ',XMIN,' ',XMAX
WRITE(*, '(5X,A3,F11.3,A3,F11.3)')'Y: ',YMIN,' ',YMAX

```

C-----See if user wants only a subset of data set

```

10  WRITE(*, '(A31,$)')' Use subset of data set? (y/n): '
    READ(*, '(A1)') YORN
    IF ((YORN.EQ.'Y').OR.(YORN.EQ.'y')) THEN
      WRITE(*, '(A27,$)')' Enter min X and max X: '
      READ(*,*)TXMIN, TXMAX
      WRITE(*, '(A27,$)')' Enter min Y and max Y: '
      READ(*,*)TYMIN, TYMAX
      K=0
      DO 15 L=1,NR
        X RANGE=0
        Y RANGE=0
        IF ((X(L).GE.TXMIN).AND.(X(L).LE.TXMAX)) X RANGE=1
        IF ((Y(L).GE.TYMIN).AND.(Y(L).LE.TYMAX)) Y RANGE=1
        IF ((X RANGE.EQ.1).AND.(Y RANGE.EQ.1)) THEN
          K=K+1
          X(K)=X(L)
          Y(K)=Y(L)
          Z(K)=Z(L)
        ENDIF
15    CONTINUE
      IF (K.LT.3) THEN
        WRITE(*,150) K
150    FORMAT(4X,'too few data (' ,I1,') within range...')
        WRITE(*,*)
        GOTO 10
      ENDIF
      XMAX=TXMAX
      XMIN=TXMIN
      YMAX=TYMAX
      YMIN=TYMIN
      NR=K
    ELSEIF ((YORN.NE.'N').AND.(YORN.NE.'n')) THEN
      WRITE(*,*)' answer either y or n...'
      GOTO 10
    ENDIF
    XORIGIN=XMAX-((XMAX-XMIN)/2.0)
    YORIGIN=YMIN

```

C-----Determine the maximum possible lag

```

XDIF=XMAX-XMIN
YDIF=YMAX-YMIN
MLAG=NINT(SQRT((XDIF**2)+(YDIF**2))+0.5)

```

C-----See if user wants a different maximum lag

```

30  WRITE(*,*)
    WRITE(*, '(A25,I4,)',) ' Largest lag interval is ',MLAG
    WRITE(*, '(A33,$)') ' Enter maximum lag (integer): '
    READ(*,*) NLAG
    IF(NLAG.GT.MLAG) NLAG=MLAG

```

C-----Ask for step size

```

31  WRITE(*, '(A31,$)') ' Enter step size (integer): '
    READ(*,*,ERR=600) NSTP

```

C-----See if NLAG>NSTP

```

    IF(NLAG.LE.NSTP) THEN
      WRITE(*,*)' step must be less than lag ....'
      GOTO 30
    ENDIF

```

ENDIF

C-----See if user wants to examine anisotropy

```

NDIR=0
40  WRITE(*,*)
    WRITE(*,'(A28,$)') ' Examine anisotropy? (y/n): '
    READ(*,'(A1)') YORN
36  IF ((YORN.EQ.'Y').OR.(YORN.EQ.'y')) THEN
310  WRITE(*,'(A26,$)') 'Number of directions: '
    READ(*,*,ERR=665) NDIR
    IF ((NDIR.LT.0).OR.(NDIR.GT.15)) THEN
        WRITE(*,*) '          value must be between 0-15...'
        GOTO 310
    ENDIF
    WRITE(*,*) ' Degrees from north and tolerance ',
+ ' (+/- degrees) for '
    DO 300 I=1,NDIR
305  WRITE(*,410) I
410  FORMAT('          Direction ',I2,': ',,$)
    READ(*,*) DIR(I),TOL(I)
    IF ((DIR(I).EQ.0.).OR.(DIR(I).EQ.360.)) DIR(I)=1E-10
    IF ((DIR(I).GT.360.).OR.(DIR(I).LT.0.)) THEN
        WRITE(*,*) '          direction out of bounds...'
        GOTO 305
    ELSEIF ((TOL(I).LT.0.).OR.(TOL(I).GT.180.)) THEN
        WRITE(*,*) '          tolerance out of bounds...'
        GOTO 305
    ENDIF
300  CONTINUE
    ELSEIF ((YORN.NE.'N').AND.(YORN.NE.'n')) THEN
        WRITE(*,*) ' answer either y or n ...'
        GOTO 40
    ENDIF
    WRITE(*,*)

```

C-----Get output file name

61 CALL GETOUT(SAS)

C-----Start semivariogram processing

```

60  DO 65 I=0,NDIR
    PI=3.1415926536
    IF(I.EQ.0) THEN
        CDIR=PI*90.0/180.0
        CTOL=DCOS(PI*180./360.)
    ELSE
        CDIR=PI*DIR(I)/180.
        CTOL=DCOS(PI*2.0*TOL(I)/360.)
    ENDIF
    SDIR=DSIN(CDIR)
    CDIR=DCOS(CDIR)
    WRITE(*,*)
    WRITE(*,*)
    WRITE(*,'(A34,I3,A13\)\') '...calculating direction',I,
+ '          ', grid point ',
70  DO 75 J=1,NLAG
    NCPL(J)=0
    DIST(J)=0.0
    GAMA(J)=0.0
    DRIFT(J)=0.0
75  CONTINUE

    Q=CHAR(8)
    WRITE(*,990)
990  FORMAT('          '\)
    DO 80 J=1,NR-1
        WRITE(*,991) Q,Q,Q,Q,Q,Q,Q,Q,Q,Q,Q,Q,Q,Q,J,NR-1
991  FORMAT('11A1,I4, ' of ',I4\')
        DO 85 M=J+1,NR
            DX=X(J)-X(M)
            DY=Y(J)-Y(M)
            DHS=(DX**2)+(DY**2)
            IF (DHS.LT.(1.0E-3*NSTP)) GOTO 85
            H=DSQRT(DHS)
            IF(H.GT.DBLE(NLAG)) GOTO 85
            DTST=(DX*SDIR/H)+(DY*CDIR/H)
            IF(DABS(DTST).LT.CTOL) GOTO 85
            M1=IDINT((H/NSTP)+0.5)+1

```

```

        NCPL(M1)=NCPL(M1)+1
        DIST(M1)=DIST(M1)+H
        DZ=SNGL(DTST*DBLE(Z(J)-Z(M))/DABS(DTST))
        DRIFT(M1)=DRIFT(M1)+DZ
        GAMA(M1)=GAMA(M1)+0.5*(DZ**2)
        INCL(J)=.TRUE.
        INCL(M)=.TRUE.
85      CONTINUE
80      CONTINUE
        WRITE(*,*)

C-----Weight gama, drift, distance for pairs at each distance
        DO 90 J=1,NLAG
            CP=FLOAT(NCPL(J))
            IF (CP.EQ.0.0) GOTO 90
            DIST(J)=DIST(J)/CP
            DRIFT(J)=DRIFT(J)/CP
            GAMA(J)=GAMA(J)/CP
90      CONTINUE

C-----Calculate stats for z's in this direction only
        JJ=0
        DO 88 J=1,NR
            IF(INCL(J)) THEN
                JJ=JJ+1
                ZSTAT(JJ)=Z(J)
            ENDIF
            INCL(J)=.FALSE.
88      CONTINUE
        CALL STATS(ZSTAT,JJ)

C-----Call output routines
        CALL PRIMGRPH(I,0)

        IF (OUTFIL.NE.'NONE') CALL TEXTOUT(I,SAS)

65      CONTINUE
        GOTO 99

C-----Error trapping
600     WRITE(*,666)
        GOTO 31

665     WRITE(*,666)
666     FORMAT('      integer only...')
        GOTO 36

99      RETURN
        END

C*****
C*****

SUBROUTINE SETUP
C      Gets column nos, z-label, fills data vectors x,y,z, transforms z

        LOGICAL      THERE,LOG,GRAPH,HAAN
        INTEGER      XCOL,YCOL,ZCOL,COL1,COL2
        CHARACTER*1   YORN,ANSW
        CHARACTER*32  FILNAM,OUTFIL,PRESOUT
        CHARACTER*20  ZLABEL,FTITLE
        CHARACTER*1   HEAD1(79),HEAD2(79),HEAD3(79),HEAD4(79)

        COMMON/DATAIN/DATA(1000,15)
        COMMON/DATACOL/X(1000),Y(1000),Z(1000)
        COMMON/FILINFO/FILNAM,OUTFIL,PRESOUT,FTITLE,
+           NCOL,NROW,HEAD1,HEAD2,HEAD3,HEAD4
        COMMON/PGMPARAM/NDIM,NR,NLAG,MLAG,NSTP,LOG,A,HAAN,
+           XMAX,XMIN,YMAX,YMIN,XCOL,YCOL,ZCOL,
+           ZLABEL,GRAPH

C-----Ask user for column numbers for X, Y, and Z
2      IF(NDIM.EQ.1) THEN
            WRITE(*,'(A29,$)') ' Column numbers for X and Z: '
            READ(*,*,ERR=600) XCOL,ZCOL
            YCOL=XCOL
        ELSEIF(NDIM.EQ.2) THEN

```

```

        WRITE(*,'(A32,$)') ' Column numbers for X,Y, and Z: '
        READ(*,*,ERR=600) XCOL,YCOL,ZCOL
    ENDIF

C-----See if columns exist
    IF ((XCOL.GT.NCOL).OR.(YCOL.GT.NCOL).OR.(ZCOL.GT.NCOL)) THEN
        WRITE(*,*) ' value out of range...'
        GOTO 2
    ENDIF

C-----Get a label for the Z variable
    WRITE(*,'(A20,$)') ' Enter label for Z: '
    READ(*,'(A20)') ZLABEL
    WRITE(*,*)

C-----See if user wants a logarithmic transformation of Z
20  WRITE(*,105)
    READ(*,'(A1)') YORN
22  IF ((YORN.EQ.'Y').OR.(YORN.EQ.'y')) THEN
        LOG=.TRUE.
        WRITE(*,106)
        READ(*,*,ERR=605) A
        IF(A.LT.0) THEN
            WRITE(*,*) ' a must be =>0...'
            WRITE(*,*)
            GOTO 22
        ENDIF
21  WRITE(*,107)
        READ(*,'(A1)') ANSW
        IF ((ANSW.EQ.'H').OR.(ANSW.EQ.'h')) THEN
            HAAN=.TRUE.
        ELSEIF ((ANSW.EQ.'N').OR.(ANSW.EQ.'n')) THEN
            HAAN=.FALSE.
        ELSE
            WRITE(*,*) ' answer H or N only...'
            GOTO 21
        ENDIF
        ELSEIF ((YORN.EQ.'N').OR.(YORN.EQ.'n')) THEN
            LOG=.FALSE.
        ELSE
            WRITE(*,*) ' answer either y or n...'
            GOTO 20
        ENDIF
        WRITE(*,*)
105  FORMAT(' Transform Z to logn(z)? (y/n): ', $)
106  FORMAT(' Specify a in the expression Z=ln(z+a): ', $)
107  FORMAT(' Specify if want [H]aan or [N]o '
+      'backtranformation: ', $)

C-----Put data from proper columns in to data work array
    K=0
    NOUTS=0
    DO 15 I=1,NROW
        IF (DATA(I,XCOL).EQ.-99.0) GOTO 15
        IF (DATA(I,YCOL).EQ.-99.0) GOTO 15
        IF (DATA(I,ZCOL).EQ.-99.0) GOTO 15
        IF(((DATA(I,ZCOL)+A).LT.1.0).AND.(LOG))THEN
            NOUTS=NOUTS+1
            GOTO 15
        ENDIF
        K=K+1
        X(K)=DATA(I,XCOL)
        Y(K)=DATA(I,YCOL)
        IF(LOG) THEN
            Z(K)=ALOG(DATA(I,ZCOL)+A)
        ELSE
            Z(K)=DATA(I,ZCOL)
        ENDIF
15  CONTINUE
    IF(NOUTS.GT.0) THEN
        WRITE(*,100) NOUTS
        WRITE(*,101)K
16  WRITE(*,102)
        READ(*,'(A1)') YORN
        IF((YORN.NE.'Y').AND.(YORN.NE.'y')) GOTO 20
        WRITE(*,*)

```

```

100   FORMAT(4X,'N.B. ',I4,' Z-values are out of range (<1.0) and')
101   FORMAT(4X,' will be ignored; there remain',I4,' values;')
102   FORMAT(4X,' is this ok? (y/n): ', $)
      ENDIF
      NR=K
      RETURN

C-----Error trapping code
600  WRITE(*,*)'   integers only...'
      GOTO 2
605  WRITE(*,*)'   numeric input only...'
      GOTO 22

      END

C*****
C*****

      SUBROUTINE GETOUT(SAS)
C   Gets name of output file, opens

      INTEGER      XCOL,YCOL,ZCOL
      LOGICAL      THERE,OPEND,GRAPH,LOG,HAAN,SAS
      CHARACTER*1  YORN
      CHARACTER*32  FILNAM,OUTFIL,PRESOUT,LASTOUT
      CHARACTER*20  ZLABEL,FTITLE
      CHARACTER*1  HEAD1(79),HEAD2(79),HEAD3(79),HEAD4(79)

      COMMON/FILINFO/FILNAM,OUTFIL,PRESOUT,FTITLE,
+          NCOL,NROW,HEAD1,HEAD2,HEAD3,HEAD4
      COMMON/PGMPARAM/NDIM,NR,NLAG,MLAG,NSTP,LOG,A,HAAN,
+          XMAX,XMIN,YMAX,YMIN,XCOL,YCOL,ZCOL,
+          ZLABEL,GRAPH

C-----Get output filename
10   WRITE(*,100)
      READ(*,'(A32)') OUTFIL
      IF ((OUTFIL.EQ.'N').OR.(OUTFIL.EQ.'n')) THEN
          OUTFIL='NONE'
      ELSEIF ((OUTFIL.EQ.'A').OR.(OUTFIL.EQ.'a')) THEN
          INQUIRE (6,OPENED=OPEND,NAME=LASTOUT)
          IF (.NOT.OPEND) THEN
              WRITE(*,*) '   there''s no output file to append to...'
              GOTO 10
          ELSE
              OUTFIL=LASTOUT
          ENDIF
      ELSE
          INQUIRE(FILE=OUTFIL,EXIST=THERE)
          INQUIRE(6,OPENED=OPEND)
          IF (THERE) THEN
              WRITE(*,110)
              READ(*,'(A1)') YORN
              IF ((YORN.EQ.'N').OR.(YORN.EQ.'n')) THEN
                  GOTO 10
              ELSEIF ((YORN.EQ.'Y').AND.(YORN.EQ.'y')) THEN
                  WRITE(*,*) '   answer either y or n...'
                  GOTO 10
              ELSE
                  GOTO 10
              ENDIF
          ENDIF
          IF (OPEND) CLOSE(6)
          OPEN(6,FILE=OUTFIL,STATUS='NEW')

C-----Ask if want graphics on output file
30   WRITE(*,120)
      READ(*,'(A1)') YORN
      IF ((YORN.EQ.'Y').OR.(YORN.EQ.'y')) THEN
          GRAPH=.TRUE.
      ELSEIF ((YORN.EQ.'N').OR.(YORN.EQ.'n')) THEN
          GRAPH=.FALSE.
      ELSE
          WRITE(*,*) '   answer either y or n...'
          GOTO 30
      ENDIF

C-----Ask if want SAS-compatible output
40   IF(OUTFIL.NE.'NONE') THEN

```

```

        WRITE(*,130)
        READ(*,'(A1)') YORN
        IF ((YORN.EQ.'Y').OR.(YORN.EQ.'y')) THEN
            SAS=.TRUE.
        ELSEIF ((YORN.EQ.'N').OR.(YORN.EQ.'n')) THEN
            SAS=.FALSE.
        ELSE
            WRITE(*,*) '      answer either y or n...'
            GOTO 40
        ENDIF
    ENDIF
ENDIF

100 FORMAT(' Output file ([N]one, [A]ppend, or filename): ', $)
110 FORMAT(' File exists; '
+         /3X, 'Do you want to write over it? (y/n): ', $)
120 FORMAT(' Should line-graphics be written to it? (y/n): ', $)
130 FORMAT(' Should output include SAS command file? (y/n): ', $)

70  RETURN
END

C*****
C*****
      SUBROUTINE STATS(X,N)
C  Calculates mean, std dev,... given vector X of length N
C  NB: Means and variances ARE backtransformed if LOG=.TRUE.
C  Returns values in common block: AMEAN,AVAR,NN,STDEV,CVA,CSKEW,
C  CKURT,SESKEW,SEKURT

      INTEGER  XCOL,YCOL,ZCOL
      LOGICAL  LOG,GRAPH,HAAN
      CHARACTER*20 ZLABEL
      REAL X(1000)
      REAL*8 SUMX,SUMX2,SUMX3,SUMX4,AM3,AM4

      COMMON/DSTATS/AMEAN,AVAR,NN,STDEV,CVA,CSKEW,CKURT,
+         SESKEW,SEKURT
      COMMON/PGMPARAM/NDIM,NR,NLAG,MLAG,NSTP,LOG,A,HAAN,
+         XMAX,XMIN,YMAX,YMIN,XCOL,YCOL,ZCOL,
+         ZLABEL,GRAPH

C-----Initialize Variables
      SUMX=0.
      SUMX2=0.
      SUMX3=0.
      SUMX4=0.

C-----Calculate Statistics
      DO 10 I=1,N
          SUMX=SUMX+X(I)
          SUMX2=SUMX2+(X(I)**2)
          SUMX3=SUMX3+(X(I)**3)
          SUMX4=SUMX4+(X(I)**4)
10  CONTINUE

      AN=FLOAT(N)
      AMEAN=SUMX/AN
      AVAR=SUMX2/AN-AMEAN**2
      AM3=SUMX3/AN-3.*AMEAN*SUMX2/AN+2.*AMEAN**3
      AM4=SUMX4/AN-4.*AMEAN*SUMX3/AN+6.*AMEAN**2*
+         SUMX2/AN-3.*AMEAN**4
      CSKEW=AM3/(AVAR**1.5)
      CKURT=AM4/(AVAR**2)
      SESKEW=SQRT((6*AN*(AN-1))/((AN-2)*(AN+1)*(AN+3)))
      SEKURT=SQRT((24*AN*(AN-1)**2)/((AN-3)*(AN-2)*(AN+3)*(AN+5)))

C-----Back transform Amean and Avar if (log); if (haan) then from Haan (1977)
      IF((LOG).AND.(HAAN)) THEN
          AMEAN=(EXP(AMEAN+(0.5*AVAR)))-A
          AVAR=((AMEAN**2)*(EXP(AVAR)-1))
      ENDIF

      STDEV=SQRT(AVAR)
      CVA=STDEV/AMEAN
      NN=N

```

RETURN  
END

C\*\*\*\*\*  
C\*\*\*\*\*

# SUBROUTINE DATREAD(READIN)

C Prompts user for input filename, checks for integrity of name  
C and reads data from the file  
C into a common workspace called DATA(1000,15)  
C which is located in named common DATAIN.  
C The data is read in in a free format style by columns; if  
C the no. of columns is not on 3rd header record user is asked for  
C value.  
C Common area FILEINFO keeps needed information in central memory

## C-----Variable list:

| C NAME    | C FUNCTION                                            |
|-----------|-------------------------------------------------------|
| C NROW    | rows read in from data file                           |
| C NCOL    | columns of data in data file                          |
| C READIN  | data file read yet? (logical)                         |
| C NUMBER  | to find # of cols, if any, in HEAD3                   |
| C PLACE   | keeps place in string for # of cols in HEAD3          |
| C FILNAM  | name of input data file                               |
| C OUTFIL  | name of present output file                           |
| C PRESOUT | name of past output file (for appending)              |
| C FTITLE  | title of data file                                    |
| C THERE   | does the user's input filename exist?                 |
| C HEAD1   | First header line of filnam (headers contain no data) |
| C HEAD2   | header 2                                              |
| C HEAD3   | header 3                                              |
| C HEAD4   | header 4                                              |
| C DATA1   | first data line (aid to determine # of cols.)         |

LOGICAL THERE, READIN  
INTEGER ERROR, PLACE  
CHARACTER\*32 FILNAM, OUTFIL, PRESOUT  
CHARACTER\*20 FTITLE  
CHARACTER\*1 HEAD1(79), HEAD2(79), HEAD3(79), HEAD4(79), DATA1(79)

COMMON/DATAIN/DATA(1000,15)  
COMMON/FILINFO/FILNAM, OUTFIL, PRESOUT, FTITLE,  
+ NCOL, NROW, HEAD1, HEAD2, HEAD3, HEAD4

## C-----Get input file

```

1  WRITE(*,100)
   FILNAM=' '
   NCOL=0
   READIN=.FALSE.
5  READ(*,'(A32)') FILNAM
   IF((FILNAM.EQ.'QUIT').OR.(FILNAM.EQ.'Quit').OR.(FILNAM.EQ.'quit'))
+   RETURN
   INQUIRE(FILE=FILNAM, EXIST=THERE)
   IF (.NOT.THERE) THEN
       WRITE(*,105)
       WRITE(*,106)
       GOTO 5
   ENDIF
100 FORMAT(1X,'Enter input filename: ', $)
105 FORMAT(4X,'File does not exist: ', A16)
106 FORMAT(4X,'try again or enter ''Quit'': ', $)

```

## C-----Get file or run title

WRITE(\*,'(A18,\$)') ' Enter run title: '  
READ(\*,'(A20)') FTITLE

## C-----Read header

```

OPEN (5, FILE=FILNAM, STATUS='OLD')
READ(5,'(79A1)') (HEAD1(I), I=1,79)
READ(5,'(79A1)') (HEAD2(I), I=1,79)
READ(5,'(79A1)') (HEAD3(I), I=1,79)
READ(5,'(79A1)') (HEAD4(I), I=1,79)
WRITE(*,*)

```

```

WRITE(*,*) 'File header (top 4 records in file):'
WRITE(*, '(1X,79A1)') (HEAD1(I), I=1,79)
WRITE(*, '(1X,79A1)') (HEAD2(I), I=1,79)
WRITE(*, '(1X,79A1)') (HEAD3(I), I=1,79)
WRITE(*, '(1X,79A1)') (HEAD4(I), I=1,79)
READ(5, '(79A1)') (DATA1(I), I=1,79)
WRITE(*,*)
WRITE(*,*) 'First data record:'
WRITE(*, '(1X,79A1)') (DATA1(I), I=1,79)
BACKSPACE 5

```

C-----Read number of columns in file

```

NUM=0
IPL=0
DO 10 I=1,79
  IF (HEAD3(I).EQ.' ') THEN
    IF (IPL.GT.0) GOTO 15
    GOTO 10
  ENDIF
  ICH=ICHAR(HEAD3(I))-48
  IF ((ICH.GE.0).AND.(ICH.LE.9)) THEN
    NUM=(NUM*(10**IPL))+ICH
    IPL=IPL+1
    IF (NUM.GT.999) GOTO 15
  ENDIF
10 CONTINUE

15 IF ((NUM.LT.2).OR.(NUM.GT.15)) THEN
17 WRITE(*, '(A33,$)') 'Number of columns in data file: '
16 READ(*, '(I4)', ERR=600) NUM
  IF (NUM.EQ.0) THEN
    CLOSE(5)
    GOTO 1
  ELSEIF ((NUM.LT.2).OR.(NUM.GT.15)) THEN
    WRITE(*,*) 'number of columns out of range.....'
    WRITE(*, '(4X,A11,$)') 'try again: '
    GOTO 16
  ENDIF
ENDIF
NCOL=NUM

```

C-----Read data

```

WRITE(*,120) NCOL,FILNAM
J=1
20 READ(5,*,END=25) (DATA(J,I), I=1,NCOL)
J=J+1
GOTO 20
25 CLOSE(5)
NROW=J-1
WRITE(*,122) NROW
120 FORMAT(/16X,'...reading ',I2,' columns from file ',A32)
122 FORMAT(16X,'...end of file after ',I4,' values'/)

READIN=.TRUE.
RETURN

```

C-----Error trapping code

```

600 WRITE(*,*) 'Value must be an integer;'
GOTO 15
END

```

C\*\*\*\*\*  
C\*\*\*\*\*

SUBROUTINE TEXTOUT(IDIR,SAS)

C Writes semivariogram output to a user-specified file

```

LOGICAL LOG,TMP,GRAPH,HAAN,SAS
CHARACTER*1 YORN
CHARACTER*32 FILNAM,OUTFIL,PRESOUT,Q*19
CHARACTER*20 ZLABEL,FTITLE
CHARACTER*1 HEAD1(79),HEAD2(79),HEAD3(79),HEAD4(79)
INTEGER XCOL,YCOL,ZCOL

COMMON/DATACOL/X(1000),Y(1000),Z(1000)
COMMON/VARIDAT/NCPL(1000),DIST(1000),GAMA(1000),DRIFT(1000),

```

```

+          DIR(15),TOL(15)
COMMON/FILINFO/FILNAM,OUTFIL,PRESOUT,FTITLE,
+          NCOL,NROW,HEAD1,HEAD2,HEAD3,HEAD4
COMMON/PGMPARAM/NDIM,NR,NLAG,MLAG,NSTP,LOG,A,HAAN,
+          XMAX,XMIN,YMAX,YMIN,XCOL,YCOL,ZCOL,
+          ZLABEL,GRAPH
COMMON/DSTATS/AMEAN,AVAR,NN,STDEV,CVA,CSKEW,CKURT,
+          SESKEW,SEKURT

IF ((NDIM.EQ.1).OR.(NDIM.EQ.2).AND.(IDIR.EQ.0)) THEN
  Q='*****'
  800  WRITE(*,800) outfil
      FORMAT(1X,' .....writing to file ',A32,$)
      WRITE(6,*)
      WRITE(6,*)
      WRITE(6, '(1X,4A19)') Q,Q,Q,Q
      WRITE(6, '(1X,4A19)') Q,Q,Q,Q
      WRITE(6,*)
      IF (NDIM.EQ.1) WRITE(6,*) 'Semivariogram Analysis - 1D'
      IF (NDIM.EQ.2) WRITE(6,*) 'Semivariogram Analysis - 2D'
      WRITE(6, '(1X,A20)') FTITLE
      WRITE(6, '(1X,A12,A32)') 'Input file: ',FILNAM
      IF (NDIM.EQ.1) WRITE(6,600) XCOL,ZCOL
      IF (NDIM.EQ.2) WRITE(6,602) XCOL,YCOL,ZCOL
      WRITE(6,605) ZLABEL
      IF (LOG) WRITE(6,625) 'ln(z+',A,')'
      IF (.NOT.LOG) WRITE(6,626) 'No'
      WRITE(6,610) NSTP
ENDIF

PRESOUT=OUTFIL
IF (NDIM.EQ.2) THEN
  DO 66 I=1,3
    66  WRITE(6,*)
  CONTINUE
ENDIF

IF ((NDIM.EQ.2).AND.(IDIR.EQ.0)) THEN
  WRITE(6,666)
ELSEIF ((NDIM.EQ.2).AND.(IDIR.GT.0)) THEN
  WRITE(6,667)
  WRITE(6,668) IDIR
  WRITE(6,669) DIR(IDIR), TOL(IDIR)
ENDIF
WRITE(6,615) MLAG
WRITE(6,620) NLAG

IF (LOG) THEN
  IF (HAAN) WRITE(6,*) ' Statistics (bcktrnsf Haan):'
  IF (.NOT.HAAN) WRITE(6,*) ' Statistics (not bcktrnsf):'
ELSE
  WRITE(6,*) ' Statistics:'
ENDIF

WRITE(6,630) AMEAN
WRITE(6,635) STDEV
WRITE(6,640) CVA
WRITE(6,645) NN
WRITE(6,650) CSKEW,SESKEW
WRITE(6,655) CKURT,SEKURT
WRITE(6,660) XMIN,XMAX
IF (NDIM.EQ.2) WRITE(6,665) YMIN,YMAX
WRITE(6,*)

TMP=.FALSE.
IF ((NDIM.EQ.2).AND.(IDIR.GT.0)) TMP=.TRUE.
IF (TMP) THEN
  WRITE(6,671)
ELSE
  WRITE(6,670)
ENDIF

J=0
DO 53 I=1,NLAG
  IF (NCPL(I).EQ.0) GOTO 53
  J=J+1
  IF (TMP) THEN

```

```

        WRITE(6,676)J,DIST(I),GAMA(I),DRIFT(I),NCPL(I),DIR(IDIR)
    ELSE
        WRITE(6,675)J,DIST(I),GAMA(I),DRIFT(I),NCPL(I)
    ENDIF

```

53 CONTINUE

```

IF(GRAPH) THEN
    WRITE(6,*)
    WRITE(6,*)
    CALL PRIMGRPH(IDIR,1)
ENDIF

```

```

IF(SAS.AND.(IDIR.EQ.0)) THEN
    WRITE(6,*)
    WRITE(6,*)
    WRITE(6,*) 'SAS Command File for Model Fitting;'
    WRITE(6,*)
    WRITE(6,*) 'TITLE1 ''Semivariogram Best Fit Tests'';'
    WRITE(6,*) 'TITLE2 ''',FTITLE,': ',ZLABEL,','';'
    WRITE(6,*) 'TITLE3 ''Input Data'';'
    WRITE(6,*) 'DATA TEMP;'
    IF((NDIM.EQ.1).OR.(IDIR.EQ.0)) THEN
        WRITE(6,*) '    INPUT I H GAMMA DRIFT N;'
    ELSE
        WRITE(6,*) '    INPUT I H GAMMA DRIFT N DIR;'
    ENDIF
    WRITE(6,*) '    CARDS;'
    J=0

```

```

    DO 63 I=1,NLAG
        IF (NCPL(I).EQ.0) GOTO 63
        J=J+1
        HMAX=MAX(HMAX,DIST(I))
        GMAX=MAX(GMAX,GAMA(I))
        WRITE(6,675)J,DIST(I),GAMA(I),DRIFT(I),NCPL(I)

```

63 CONTINUE

```

    WRITE(6,*)';'
    WRITE(6,*)
    WRITE(6,*) 'PROC PRINT;'
    WRITE(6,*)
    WRITE(6,*) 'TITLE3 ''Linear to Range'';'
    WRITE(6,*) 'PROC NLIN;'
    WRITE(6,705) GMAX*.01
    FORMAT(1X,'    PARAMETERS CO=',G10.4)
    WRITE(6,710) GMAX*.7
    FORMAT(1X,'    C=',G10.4)
    WRITE(6,725) HMAX*.5
    FORMAT(1X,'    A=',G10.4,',';)
    WRITE(6,720)
    FORMAT(1X,'    BOUNDS 0<CO, 0<C, 0<A;')
    WRITE(6,*) '    _WEIGHT =N;'
    WRITE(6,*) '    IF H<A THEN DO;'
    WRITE(6,*) '        MODEL GAMMA=H*((C-CO)/A)+CO;'
    WRITE(6,*) '    END;'
    WRITE(6,*) '    ELSE DO;'
    WRITE(6,*) '        MODEL GAMMA=C;'
    WRITE(6,*) '    END;'
    WRITE(6,*) '    OUTPUT PREDICTED=GHAT_L PARMS=CO_L C_L A_L;'
    WRITE(6,*) 'PROC PLOT;'
    WRITE(6,*) '    PLOT GAMMA*H=***' GHAT_L*H='L' ',
+       '/OVERLAY VZERO HZERO;'

```

```

    WRITE(6,*)
    WRITE(6,*) 'TITLE3 ''Spherical Model'';'
    WRITE(6,*) 'PROC NLIN;'
    WRITE(6,705) GMAX*.01
    WRITE(6,710) GMAX*.7
    WRITE(6,725) HMAX*.5
    WRITE(6,720)
    WRITE(6,*) '    _WEIGHT =N;'
    WRITE(6,*) '    IF H<A THEN DO;'
    WRITE(6,*) '        MODEL GAMMA=CO+(C-CO)*(1.5*(H/A)',
+           '-0.5*((H/A)**3));'
    WRITE(6,*) '    END;'
    WRITE(6,*) '    ELSE DO;'
    WRITE(6,*) '        MODEL GAMMA=C;'

```

```

WRITE(6,*)' END;'
WRITE(6,*)' OUTPUT PREDICTED=GHAT_S PARS=CO_S C_S A_S;'
WRITE(6,*)'PROC PLOT;'
WRITE(6,*)' PLOT GAMMA*H=''' GHAT_S*H='''S'' ',
+ '/OVERLAY VZERO HZERO;'

WRITE(6,*)
WRITE(6,*)'TITLE3 ''Exponential Model'';'
WRITE(6,*)'PROC NLIN;'
WRITE(6,705) GMAX*.01
WRITE(6,710) GMAX*.7
WRITE(6,725) HMAX/3.
WRITE(6,720)
WRITE(6,*)' _WEIGHT_=N;'
WRITE(6,*)' MODEL GAMMA=CO+(C-CO)*(1-EXP(-H/A));'
WRITE(6,*)' OUTPUT PREDICTED=GHAT_E PARS=CO_E C_E A_E;'
WRITE(6,*)'PROC PLOT;'
WRITE(6,*)' PLOT GAMMA*H=''' GHAT_E*H='''E'' ',
+ '/OVERLAY VZERO HZERO;'

WRITE(6,*)
WRITE(6,*)'TITLE3 ''Gaussian Model'';'
WRITE(6,*)'PROC NLIN;'
WRITE(6,705) GMAX*.01
WRITE(6,710) GMAX*.7
WRITE(6,725) HMAX*.5
WRITE(6,720)
WRITE(6,*)' _WEIGHT_=N;'
WRITE(6,*)' MODEL GAMMA=CO+(C-CO)*'
+ '(1-EXP(-(H**2/(A/3**.5)**2)));';
WRITE(6,*)' OUTPUT PREDICTED=GHAT_G PARS=CO_G C_G A_G;'
WRITE(6,*)'PROC PLOT;'
WRITE(6,*)' PLOT GAMMA*H=''' GHAT_G*H='''G'' ',
+ '/OVERLAY VZERO HZERO;'

WRITE(6,*)
WRITE(6,*)'PROC RSQUARE;'
WRITE(6,*)' MODEL GAMMA=GHAT_L GHAT_S GHAT_E GHAT_G'
WRITE(6,*)' /STOP=1;'
WRITE(6,*)
WRITE(6,*)'PROC PRINT;'
WRITE(6,*)' VAR GAMMA H N GHAT_L CO_L C_L A_L'
WRITE(6,*)' GHAT_S CO_S C_S A_S'
WRITE(6,*)' GHAT_E CO_E C_E A_E'
WRITE(6,*)' GHAT_G CO_G C_G A_G;'
WRITE(6,*)
WRITE(6,*)'ENDSAS;'
ENDIF

```

```

WRITE(*,*)
WRITE(*,*)
WRITE(*,*)
WRITE(*,*)
RETURN

```

```

600 FORMAT(1X,'Columns X,Z: ',I3,I3)
602 FORMAT(1X,'Columns X,Y,Z: ',I3,I3,I3)
605 FORMAT(1X,'Z Label: ',A20)
610 FORMAT(1X,'Step Size: ',I4)
615 FORMAT(1X,'Lag Maximum: ',I4)
620 FORMAT(1X,' Used: ',I4)
625 FORMAT(1X,'Transform Z: ',A5,F5.1,A1)
626 FORMAT(1X,'Transform Z: ',A2)
630 FORMAT(1X,' Mean : ',F8.4)
635 FORMAT(1X,' Std. Dev: ',F8.4)
640 FORMAT(1X,' C.V.: ',F8.4)
645 FORMAT(1X,' N: ',I4)
650 FORMAT(1X,' Skewness: ',F8.3,'(',F8.3,')')
655 FORMAT(1X,' Kurtosis: ',F8.3,'(',F8.3,')')
660 FORMAT(1X,'Bounds X: ',F6.1,' ',F6.1)
665 FORMAT(1X,' Y: ',F6.1,' ',F6.1)
666 FORMAT(1X,'Isotropic Analysis')
667 FORMAT(1X,'Anisotropic Analysis')
668 FORMAT(1X,' Direction ',I2)
669 FORMAT(1X,' Degrees from north: ',F5.1,' (+/-',F5.1,')')
670 FORMAT(6X,'Lag# Distance Gamma',15X,'Drift',8X,'Couples')
671 FORMAT(6X,'Lag# Distance Gamma',15X,'Drift',8X,'Couples',
+ ' Direction')
675 FORMAT(5X,I4,2X,F9.2,2X,F17.4,3X,F17.4,3X,I5)
676 FORMAT(5X,I4,2X,F9.2,2X,F17.4,3X,F17.4,3X,I5,3X,F6.1)

```

END

```
C*****
C*****
```

SUBROUTINE PRIMGRPH(IDIR,NUNIT)

```
C----Draws primitive gamma vs. lag 2-dimensional graph
C   on 80 character x 25 line screen
C   IDIR=direction number (2d semivariograms)
C   NUNIT=file unit specifier; 0=screen, 1=current output file (6)
```

```
LOGICAL  THERE,LOG,GRAPH,HAAN
INTEGER  XPLACE,YPLACE,GRPH(20,70),OUT,XCOL,YCOL,ZCOL
REAL  YAXIS(25)
CHARACTER*32 FILNAM,PRESOUT,OUTFIL
CHARACTER*20 FTITLE,ZLABEL
CHARACTER CHR(15)*1,Q*10
CHARACTER*1 HEAD1(79),HEAD2(79),HEAD3(79),HEAD4(79)
```

```
C----Common blocks
COMMON/VARIDAT/NCPL(1000),DIST(1000),GAMA(1000),DRIFT(1000),
+   DIR(15),TOL(15)
COMMON/FILINFO/FILNAM,OUTFIL,PRESOUT,FTITLE,
+   NCOL,NROW,HEAD1,HEAD2,HEAD3,HEAD4
COMMON/PGMPARAM/NDIM,NR,NLAG,MLAG,NSTP,LOG,A,HAAN,
+   XMAX,XMIN,YMAX,YMIN,XCOL,YCOL,ZCOL,
+   ZLABEL,GRAPH
COMMON/DSTATS/AMEAN,AVAR,NN,STDEV,CVA,CSKEW,CKURT,
+   SESKEW,SEKURT
```

```
IF(NUNIT.EQ.1) THEN
  OUT=6
ELSE
  OUT=0
ENDIF
```

```
C----Initialize
DO 80 I=1,20
  DO 80 J=1,70
    GRPH(I,J)=0
80  CONTINUE
```

```
C----FIND GMAX, DMAX
GMAX=0.
DO 10 I=1,NLAG
  IF(GAMA(I).GT.GMAX) GMAX=GAMA(I)
10  CONTINUE
DMAX=FLOAT(NLAG)
DMAX=DMAX+0.05*DMAX
GMAX=GMAX+0.05*GMAX
```

```
C----CREATE SCREEN MATRIX GRPH
DO 250 I=1,NLAG
  IF (NCPL(I).EQ.0) GOTO 250
  XPLACE=NINT((DIST(I)/DMAX)*70.)
  YPLACE=21-NINT((GAMA(I)/GMAX)*20.)
  GRPH(YPLACE,XPLACE)=GRPH(YPLACE,XPLACE)+1
250  CONTINUE
```

```
C----CREATE Y-AXIS VECTOR
K=0
DO 260 I=20,1,-1
  K=K+1
  IF(INT(FLOAT(I)/4.).EQ.FLOAT(I)/4.) THEN
    YAXIS(K)=FLOAT(I)*GMAX/20.
  ELSE
    YAXIS(K)=-99.
  ENDIF
260  CONTINUE
YAXIS(20)=-99.
```

```
C----PRINT TOP 20 ROWS (GRPH MATRIX)
WRITE(OUT,101)
```

```

WRITE(OUT,*)
DO 265 I=1,20
  IF (YAXIS(I).NE.-99.) THEN
    WRITE(OUT,100) YAXIS(I),
  ELSE
    WRITE(OUT,101)
  ENDIF
DO 270 J=1,70
  IF ((GRPH(I,J).GE.1).AND.(GRPH(I,J).LE.9)) THEN
    WRITE(OUT,105) GRPH(I,J),
  ELSEIF (GRPH(I,J).GT.9) THEN
    WRITE(OUT,106) '#',
  ELSEIF (GRPH(I,J).EQ.0) THEN
    WRITE(OUT,106) ' ',
  ENDIF
270   CONTINUE
      WRITE(OUT,*)
265   CONTINUE

100  FORMAT(1X,G6.1,'>'\)
101  FORMAT(1X,6X,'+\)
105  FORMAT(11\)
106  FORMAT(A1\)

```

C-----X AXIS AND LINES BELOW

```

      Q='^+++++++'
      WRITE(OUT,110)
      WRITE(OUT,111) Q,Q,Q,Q,Q,Q,Q
      WRITE(OUT,115)
      DO 280 I=1,6
        WRITE(OUT,116) FLOAT(I)*DMAX/7.
280   CONTINUE
      WRITE(OUT,*)
      WRITE(OUT,117)
110   FORMAT(1X,6X\)
111   FORMAT(7A10)
115   FORMAT(1X,6X,' 0   '\)
116   FORMAT(' ',G8.2\)
117   FORMAT(1X,6X,30X,'lag (h)')

      IF (NDIM.EQ.1) THEN
        WRITE(OUT,120)
      ELSEIF (NDIM.EQ.2) THEN
        IF (IDIR.EQ.0) THEN
          WRITE(OUT,125)
        ELSE
          WRITE(OUT,130) DIR(IDIR),TOL(IDIR)
        ENDIF
      ENDIF
120  FORMAT(1X,6X,20X,'Single-Dimension Analysis'\)
125  FORMAT(1X,6X,23X,'Isotropic Analysis'\)
130  FORMAT(1X,6X,12X,'Anisotropic Analysis ('
+      F5.1,' +/-',F4.1,' dgrs N)\)

```

C-----Hold screen until <cr>

```

      IF (OUT.EQ.0) THEN
        WRITE(OUT,'(\)')
        READ(OUT,'(A1)') Q
        DO 300 I=1,25
          WRITE(OUT,*)
300   CONTINUE
        WRITE(OUT,*)
      ENDIF

      RETURN
      END

```

```

C*****
C*****
C*****
C***** End of Semivar.for *****
C*****
C*****
C*****

```

Semivar.for Output file Semivar.out

\*\*\*\*\*  
\*\*\*\*\*

# Semivariogram Analysis - 2D

Sample run

Input file: Sample.prn

Columns X,Y,Z: 1 2 3

Z Label: Zvariate

Transform Z: Ln(z+ 1.0)

Step Size: 5

## Isotropic Analysis

Lag Maximum: 113

Used: 70

Statistics (bcktrnsf Haan):

Mean : .3972

Std. Dev: .0571

C.V.: .1438

N: 248

Skewness: .790( .155)

Kurtosis: 4.064( .308)

Bounds X: .2, 79.9

Y: .0, 79.4

| Lag# | Distance | Gamma | Drift  | Couples |
|------|----------|-------|--------|---------|
| 1    | 1.90     | .0127 | .0216  | 34      |
| 2    | 5.53     | .0135 | .0041  | 620     |
| 3    | 10.15    | .0157 | -.0034 | 1267    |
| 4    | 15.03    | .0159 | .0049  | 1723    |
| 5    | 20.03    | .0183 | .0016  | 2114    |
| 6    | 25.05    | .0179 | .0058  | 2337    |
| 7    | 30.00    | .0189 | .0120  | 2520    |
| 8    | 34.99    | .0199 | .0135  | 2636    |
| 9    | 39.99    | .0201 | .0148  | 2650    |
| 10   | 44.99    | .0227 | .0213  | 2617    |
| 11   | 49.92    | .0233 | .0225  | 2433    |
| 12   | 54.93    | .0244 | .0156  | 2346    |
| 13   | 59.95    | .0249 | .0231  | 2060    |
| 14   | 64.89    | .0231 | .0308  | 1752    |
| 15   | 68.71    | .0219 | .0129  | 756     |

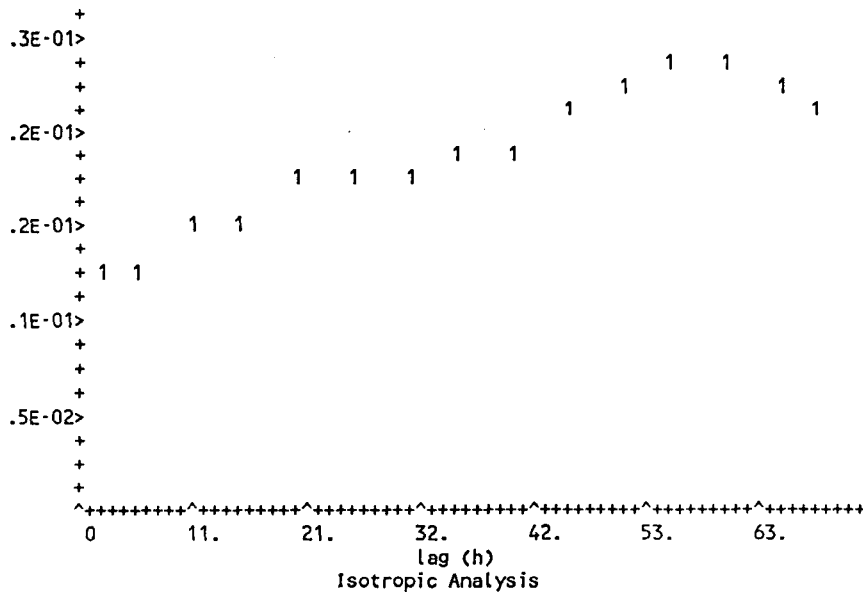

SAS Command File for Model Fitting;

TITLE1 'Semivariogram Best Fit Tests';

TITLE2 'Sample run : Zvariate ';

TITLE3 'Input Data';

```
DATA TEMP;
  INPUT I H GAMMA DRIFT N;
  CARDS;
    1      1.90      .0127      .0216      34
    2      5.53      .0135      .0041      620
    3     10.15      .0157      -.0034     1267
    4     15.03      .0159      .0049     1723
    5     20.03      .0183      .0016     2114
    6     25.05      .0179      .0058     2337
    7     30.00      .0189      .0120     2520
    8     34.99      .0199      .0135     2636
    9     39.99      .0201      .0148     2650
   10     44.99      .0227      .0213     2617
   11     49.92      .0233      .0225     2433
   12     54.93      .0244      .0156     2346
   13     59.95      .0249      .0231     2060
   14     64.89      .0231      .0308     1752
   15     68.71      .0219      .0129     756
;
```

```
PROC PRINT;
```

```
TITLE3 'Linear to Range';
```

```
PROC NLIN;
```

```
  PARAMETERS CO= .2490E-03
```

```
           C= .1743E-01
```

```
           A= 34.36 ;
```

```
  BOUNDS 0<CO, 0<C, 0<A;
```

```
  WEIGHT _N;
```

```
  IF H<A THEN DO;
```

```
    MODEL GAMMA=H*((C-CO)/A)+CO;
```

```
  END;
```

```
  ELSE DO;
```

```
    MODEL GAMMA=C;
```

```
  END;
```

```
  OUTPUT PREDICTED=GHAT_L PARMS=CO_L C_L A_L;
```

```
PROC PLOT;
```

```
  PLOT GAMMA*H='*' GHAT_L*H='L' /OVERLAY VZERO HZERO;
```

```
TITLE3 'Spherical Model';
```

```
PROC NLIN;
```

```
  PARAMETERS CO= .2490E-03
```

```
           C= .1743E-01
```

```
           A= 34.36 ;
```

```
  BOUNDS 0<CO, 0<C, 0<A;
```

```
  WEIGHT _N;
```

```
  IF H<A THEN DO;
```

```
    MODEL GAMMA=CO+(C-CO)*(1.5*(H/A)-0.5*((H/A)**3));
```

```
  END;
```

```
  ELSE DO;
```

```
    MODEL GAMMA=C;
```

```
  END;
```

```
  OUTPUT PREDICTED=GHAT_S PARMS=CO_S C_S A_S;
```

```
PROC PLOT;
```

```
  PLOT GAMMA*H='*' GHAT_S*H='S' /OVERLAY VZERO HZERO;
```

```
TITLE3 'Exponential Model';
```

```
PROC NLIN;
```

```
  PARAMETERS CO= .2490E-03
```

```
           C= .1743E-01
```

```
           A= 22.90 ;
```

```
  BOUNDS 0<CO, 0<C, 0<A;
```

```
  WEIGHT _N;
```

```
  MODEL GAMMA=CO+(C-CO)*(1-EXP(-H/A));
```

```
  OUTPUT PREDICTED=GHAT_E PARMS=CO_E C_E A_E;
```

```
PROC PLOT;
```

```
  PLOT GAMMA*H='*' GHAT_E*H='E' /OVERLAY VZERO HZERO;
```

```
TITLE3 'Gaussian Model';
```

```
PROC NLIN;
```

```
  PARAMETERS CO= .2490E-03
```

```
           C= .1743E-01
```

```
           A= 34.36 ;
```

```
  BOUNDS 0<CO, 0<C, 0<A;
```

```
  WEIGHT _N;
```

```
  MODEL GAMMA=CO+(C-CO)*(1-EXP(-(H**2/(A/3**5)**2)));
```

```
  OUTPUT PREDICTED=GHAT_G PARMS=CO_G C_G A_G;
```

```
PROC PLOT;
  PLOT GAMMA*H='*' GHAT_G*H='G' /OVERLAY VZERO HZERO;
```

```
PROC RSQUARE;
  MODEL GAMMA=GHAT_L GHAT_S GHAT_E GHAT_G
    /STOP=1;
```

```
PROC PRINT;
  VAR  GAMMA H N GHAT_L CO_L C_L A_L
      GHAT_S CO_S C_S A_S
      GHAT_E CO_E C_E A_E
      GHAT_G CO_G C_G A_G;
```

```
ENDSAS;
```

File Punctual.hlp; to accompany

Program Punctual.for,  
Punctual Kriging Analysis  
Version 11.10.86 Copyright (c) 1986 G.P. Robertson

The correct citation for this program is  
Robertson, G.P. 1987. Geostatistics in ecology: interpolating  
with known variance. Ecology 68:

Later releases of this program available from: Computer Services Laboratory  
W.K. Kellogg Biol. Station  
Michigan State University  
Hickory Corners, MI 49060.

#### Program parameters:

1. Hardware requirements. This version was written in Microsoft Fortran version 3.3 designed to run under the IBM MS-DOS 2.0+ operating system. Compilation by other compilers compatible with the ANSI 77 standard should be possible.

2. Data Input. Data is read into the program as ASCII characters in free format from a user-specified file. The first 4 lines of the input file are treated as header lines -- they should not contain data. If the first characters of the third line are numeric, they are assumed to represent the number of columns in each data record. A sample header:

```
Line 1: File xxxxx.prn from supporting files xxyyy.ext and xxxyy.ext;
2: Small grid samples taken 5/19.....
3: 15 columns: Sample#, Xcor, Ycor, z1,z2,z3,z4,z5,
4:      z6,z7,z8,z9,z10,z11,z12.
5: 1 0 15 4.3 2.11 .0003 -99. 2.3 3 5 4 3 2 2 1.9997
```

If the column no. value on line 3 is not correct or if there are different numbers of columns in any row, the data will not be read correctly and calculations will be incorrect. Missing values are represented by the value -99. Data size limitations are 15 columns x 1000 rows, though redimensioning key variables will allow indefinite input file sizes.

3. Output. Output data is written to a user-specified output file or to the screen if no output file is specified. All data is ASCII format and can be subsequently printed or read into another program.

#### 4. User-specified prompts:

- a) Main menu; a) read data file; see limitations above;  
b) scan current data set; use cntrl-s to halt scrolling;  
c) punctual kriging analysis;  
d) neighborhood analysis; use to define optimal neighborhood parameters for punctual analysis; this routine uses jackknifing to explore reduced error with a range of different neighborhood parameters; requires substantial CPU time;  
e) help; this output;  
f) exit program;
- b) input file name; conform to MSDOS convention; supports directory paths;
- c) run title; as desired for labeling output graphs; 64 char. max;
- d) number of dimensions; either 1 or 2;
- e) x,z or x,y,z columns: columns in which x coordinates, y coordinates, and active z-value can be found;
- f) z-label: as desired for labeling output, 64 char. max;
- g) use subset of data set; to use only part of the input (measured) data grid in the interpolation analysis;
- h) transform z-value; if requested, z is logn-transformed with the option of adding a constant to each value before transforming; because of the discontinuous nature of this distribution over the range <-1 to >1, all values <1.0 are ignored for the duration of the analysis; note that the transformation lasts only until the next Punctual menu; the statistics output give back-transformed values (Haan 1977) as

requested -- see note below;

i) specify semivariogram model; 4 models are available: linear to specified range, spherical, exponential, and gaussian. Model parameters are CO (y-intercept), C (sill value), and A (range in the case of the linear and spherical models, some factor of range in exponential and gaussian models). These model parameters can be taken directly from the output of the semivariogram program after running it through SAS's nonlinear estimation routines;

j) neighborhood parameters; unless neighborhood analysis is requested, user must provide a) the maximum number of neighbors M to use for interpolating any given grid point (100 max), and b) the maximum radius within which to search for neighbors (up to the maximum distance separating any two points to be interpolated). All neighbors within the maximum radius are sorted by distance and the nearest M are used for the interpolation.

k) interpolation grid definition; the coordinate points making up the interpolation grid can be either 1) calculated as a rectangular grid with user-specified increments between x and between y interpolation points; 2) read from a separate file containing the coordinate points (the file should contain 4 header lines, and an indefinite number of records containing either 1 or 2 values each for the x and (if two dimensional) y coordinates); 3) the same as the coordinate points for the input data set with normal interpolation (self-fit); or 4) the same as the coordinate points for the input data set but interpolation jackknifed.

l) use subset of interpolation grid; if only part of the interpolation grid is to be calculated; note that points in the measured data grid that are outside the interpolation grid may be used in the interpolation of these points if they satisfy the neighborhood requirements.

j) specify output file; N = results are not read to output file, appear on screen only;  
A = appends results to last output file opened;  
f = name of new output file; if file exists, can write over it or append to it as specified;

N.B. Read carefully the annotations on the output file; where the backtransformation of transformed values was requested, Haan's (1977) method is used, where the backtransformed mean =  $\exp([\text{mean of logn values}] + 0.5 * \text{var of logn values}) - A$ ; and the backtransformed variance =  $([\text{mean of untransformed values}]^2 * (\exp[\text{var of logn values}] - 1))$ . Where A = the constant added to original values before ln transformation in order to bring original values to >1.0 before ln transformation. (See Haan, C.T. 1977. Chapter 6. Some continuous probability distributions. Statistical Methods in Hydrology. The Iowa State Univ. Press, Ames, Iowa.)

\$storage:2

# PROGRAM PUNCTUAL

C Version 11.10.86  
 C Copyright (c) 1986 G.P. Robertson. All rights reserved.

C The correct citation for this program is Robertson, G.P. 1987.  
 C Geostatistics in ecology: interpolating with known variance.  
 C Ecology 68:(in press).

C This program is being maintained at the Computer Services Laboratory  
 C W.K. Kellogg Biological Station  
 C Michigan State University  
 C Hickory Corners, MI 49060.

C Please report significant bugs and well-documented enhancements  
 C to this address for inclusion in later versions.

C Documentation for users appears in file Punctual.hlp.

C Subroutines: DATREAD, SCAN, UCASE, LCASE, KRIGE, NBHDANAL, SETPUN,  
 C DEFPTS, TRANSFORM, BOUNDS, INTBOUNDS, STATS, GETOUT,  
 C DEFMODEL, DEFNEIGH, TEXT1OUT, GETNBR, SORT, NEXTPT,  
 C SIMUL, CALCBG, CALCFN

## C-----Variable list

| C NAME    | C FUNCTION                                               |
|-----------|----------------------------------------------------------|
| C ----    | C -----                                                  |
| C FILNAM  | C input data file                                        |
| C OUTFIL  | C file where output data sent                            |
| C PRESOUT | C last output file named (used in appending)             |
| C FTITLE  | C run title                                              |
| C ZLABEL  | C z-variable title                                       |
| C XCOL    | C column in filnam with x-coordinate values              |
| C YCOL    | C column with y-coordinate values                        |
| C ZCOL    | C column with z-coordinate values                        |
| C XMAX    | C greatest x-coordinate                                  |
| C XMIN    | C least x-coordinate                                     |
| C YMAX    | C greatest y-coordinate                                  |
| C YMIN    | C least y-coordinate                                     |
| C GXMAX   | C greatest interpolation grid x-coord                    |
| C GYMAX   | C greatest interp. grid y-coord                          |
| C GXMIN   |                                                          |
| C GYMIN   |                                                          |
| C LOG     | C log transformation? (logical)                          |
| C HAAN    | C back-transform using Haan (1977) (logical)             |
| C NR      | C number of valid data elements                          |
| C XINC    | C x interpolation increment                              |
| C YINC    | C y interpolation increment                              |
| C RNBHD   | C radius of neighborhood (user defined)                  |
| C RNBMAX  | C maximum radius neighborhood (data defined)             |
| C MAXNBR  | C maximum no. of neighbors (user defined)                |
| C MODEL   | C semivariogram model                                    |
| C C0      | C y-intercept of semivariogram                           |
| C C9      | C of semivariogram model                                 |
| C A9      | C A of semivariogram model                               |
| C HRDGRD  | C true if interpolation grid coord. to be read from file |
| C HRDFIL  | C name of file if hrdgrd true                            |
| C JACK    | C true if jackknife                                      |
| C SELF    | C true if fitting only input data coordinates            |

IMPLICIT REAL\*8 (A-H,O-Z)

REAL\*4 DATA

INTEGER CHOICE,XCOL,YCOL,ZCOL

CHARACTER\*1 HEAD1,HEAD2,HEAD3,HEAD4,LINE(79),YORN

CHARACTER\*64 FILNAM,OUTFIL,LSTOUT,FTITLE,ZLABEL,HRDFIL

LOGICAL TWODIM,LOG,HAAN,HERC,CHECK,BOUND,READIN,HRDGRD,

+ OPEND,JACK,SELF,THERE

COMMON/DATAIN/DATA(1000,15)

COMMON/DATACOLS/X(1000),Y(1000),Z(1000)

COMMON/FILINFO/FILNAM,OUTFIL,LSTOUT,FTITLE,NCOL,NROW,

+ HEAD1(79),HEAD2(79),HEAD3(79),HEAD4(79)

```

COMMON/GENPARAM/NR,NRGRID,TWODIM,HERC,CHECK,HAAN,LOG,BOUND,
+      OFF,XCOL,YCOL,ZCOL,ZLABEL,TZMN,TZVAR,UZMN,UZVAR,
+      BZMN,BZVAR,XMIN,XMAX,YMIN,YMAX,GXMIN,GXMAX,
+      GYMIN,GYMAX,NRTOT
COMMON/PUNPARAM/XINC,YINC,RNBHD,RNBMAX,MAXNBR,MODEL,
+      C0,C9,A9,HRDGRD,HRDFIL,JACK,SELF

```

C-----Write menu header

```
DO 3 I=1,5
```

```
  WRITE(*,*)
```

3

```
  CONTINUE
```

```
  WRITE(*,*)'Program Punctual'
```

```
  WRITE(*,*)' Punctual Kriging Analysis'
```

```
  WRITE(*,*)' Version 11.10.86'
```

```
  WRITE(*,*)' '
```

```
  WRITE(*,*)'See file Punctual.hlp and source code listing'
```

```
  WRITE(*,*)' for documentation and copyright information'
```

```
  WRITE(*, '(//1X,A,$)')'Hit <return> to continue.....'
```

```
  READ(*, '(A1)') YORN
```

```
  WRITE(*, '(//////////1X)')
```

```
  READIN=.FALSE.
```

C-----Choose function

1

```
  WRITE(*,*)
```

```
  CHECK=.FALSE.
```

```
  IF (.NOT.READIN) THEN
```

```
    WRITE(*,400) 'None'
```

```
  ELSE
```

```
    WRITE(*,400) FILNAM
```

```
    WRITE(*,405) NCOL
```

```
    WRITE(*,410) NROW
```

```
  ENDIF
```

```
400  FORMAT(/1X,'Current file: ',A32)
```

```
405  FORMAT(1X,'  number of columns:',I3)
```

```
410  FORMAT(1X,'  number of rows: ',I5)
```

```
  WRITE(*,*)
```

```
  WRITE(*,*)'Choose a function:'
```

```
  WRITE(*,*)'  1. Read in data file'
```

```
  WRITE(*,*)'  2. Scan current data set'
```

```
  WRITE(*,*)'  3. Neighborhood estimation analysis'
```

```
  WRITE(*,*)'  4. Punctual kriging analysis'
```

```
  WRITE(*,*)'  5. Help'
```

```
  WRITE(*,*)'  6. End Program'
```

```
  WRITE(*,*)
```

```
  WRITE(*, '(4X,A14,$)')'Enter choice: '
```

```
2  READ(*,*,ERR=600) CHOICE
```

```
  IF (CHOICE.EQ.1) THEN
```

```
    CALL DATREAD(READIN)
```

```
    IF(.NOT.READIN) GOTO 1
```

```
  ELSEIF (CHOICE.EQ.2) THEN
```

```
    IF(.NOT.READIN) CALL DATREAD(READIN)
```

```
    IF(.NOT.READIN) GOTO 1
```

```
    CALL SCAN
```

```
  ELSEIF (CHOICE.EQ.3) THEN
```

```
    IF (.NOT.READIN) CALL DATREAD(READIN)
```

```
    IF(.NOT.READIN) GOTO 1
```

```
    CALL NBHDANAL
```

```
  ELSEIF (CHOICE.EQ.4) THEN
```

```
    IF (.NOT.READIN) CALL DATREAD(READIN)
```

```
    IF(.NOT.READIN) GOTO 1
```

```
    CALL KRIGE
```

```
  ELSEIF (CHOICE.EQ.5) THEN
```

C-----SEE IF HELP FILE PRESENT

```
  INQUIRE(FILE='PUNCTUAL.HLP', EXIST=THEORE)
```

```
  IF (THEORE) THEN
```

```
    DO 12 I=1,10
```

```
      WRITE(*,*)
```

12

```
      CONTINUE
```

```
      OPEN (7,FILE='PUNCTUAL.HLP',STATUS='OLD')
```

10

```
      DO 11 J=1,24
```

```
        READ (7, '(79A1)',END=20) (LINE(I),I=1,79)
```

```
        WRITE(*, '(1X,79A1)') (LINE(I),I=1,79)
```

11

```
      CONTINUE
```

```
      WRITE(*, '(20X,A,$)')'.....hit <return> to continue.....'
```

```

      READ(*,'(A1)') YORN
      GOTO 10
20    CLOSE(7)
      WRITE(*,'(/1X,A,$)')'.....hit <return> to continue.....'
      READ(*,'(A1)') YORN
      WRITE(*,'(//////////1X)')
    ELSE
      WRITE(*,*)'  file Punctual.hlp not in directory...'
    ENDIF
    ELSEIF (CHOICE.EQ.6) THEN
      INQUIRE(6,OPENED=OPEND)
      IF(OPEND) CLOSE(6)
      WRITE(*,*)
      WRITE(*,*)'Program Punctual;'
      WRITE(*,*)'Normal termination.'
      WRITE(*,*)
      GOTO 999
    ELSE
      GOTO 600
    ENDIF
  GOTO 1

C-----Error trapping
600  WRITE(*,*)'  entry error.....'
602  WRITE(*,'(7X,A,$)')'try again: '
      GOTO 2

999  END

```

```

C*****
C*****

```

# SUBROUTINE DATREAD(READIN)

```

C  Data is read in in a free format style by columns; if
C  the no. of columns is not on 3rd header record user is asked for
C  value.

C  NROW      rows read in from data file (total potential z-points)
C  NRTOT     no. of measured z-points in input dataset
C  NR        no. of valid z-points in measured grid used
C  NRGRID    no. of valid measured z-points in interpol. grid
C  NCOL      columns of data in data file
C  READIN    data file read yet?
C  NUM       to find # of cols, if any, in HEAD3
C  FILNAM    name of input data file
C  OUTFIL    name of present output file
C  LSTOUT    name of past output file (for appending)
C  FTITLE    title of data file
C  HEAD1etc  First header line of filnam (no x,y,z data in header)

```

```

IMPLICIT REAL*8 (A-H,O-Z)

```

```

REAL*4      DATA

```

```

INTEGER     XCOL,YCOL,ZCOL

```

```

CHARACTER*64 TMPNAM,FILNAM,OUTFIL,LSTOUT,FTITLE,ZLABEL

```

```

CHARACTER*1  HEAD1,HEAD2,HEAD3,HEAD4,DATA1(79),YORN

```

```

LOGICAL      TWODIM,THERE,READIN,LOG,HAAN,HERC,CHECK,BOUND

```

```

COMMON/DATAIN/DATA(1000,15)

```

```

COMMON/FILINFO/FILNAM,OUTFIL,LSTOUT,FTITLE,NCOL,NROW,

```

```

+   HEAD1(79),HEAD2(79),HEAD3(79),HEAD4(79)

```

```

COMMON/GENPARAM/NR,NRGRID,TWODIM,HERC,CHECK,HAAN,LOG,BOUND,

```

```

+   OFF,XCOL,YCOL,ZCOL,ZLABEL,TZMN,TZVAR,UZMN,UZVAR,

```

```

+   BZMN,BZVAR,XMIN,XMAX,YMIN,YMAX,GXMIN,GXMAX,

```

```

+   GYMIN,GYMAX,NRTOT

```

```

C-----Get input file

```

```

1  WRITE(*,*)
6  WRITE(*,100)
5  READ(*,'(A64)') TMPNAM
    CALL UCASE(TMPNAM)
    IF((TMPNAM.EQ.'QUIT').OR.(TMPNAM.EQ.'EXIT').OR.
+     (TMPNAM.EQ.'END').OR.(TMPNAM(1:2).EQ.'NO')) RETURN

```

```

C-----See if file exists

```

```

INQUIRE(FILE=TMPNAM,EXIST=THEORE)

```

```

      IF (.NOT.THERE) THEN
        WRITE(*,105)
        WRITE(*,106)
        GOTO 5
      ENDIF
100  FORMAT(1X,'Enter input filename: ', $)
105  FORMAT(4X,'File does not exist; ',A20)
106  FORMAT(4X,'try again or enter "Quit": ', $)

C-----Get file or run title
      WRITE(*,'(A18,$)') ' Enter run title: '
      READ(*,'(A64)') FTITLE

C-----Read header
      OPEN (5,FILE=TMPNAM,STATUS='OLD',ERR=605)
      READ(5,'(79A1)',ERR=605) (HEAD1(I), I=1,79)
      READ(5,'(79A1)',ERR=605) (HEAD2(I), I=1,79)
      READ(5,'(79A1)',ERR=605) (HEAD3(I), I=1,79)
      READ(5,'(79A1)',ERR=605) (HEAD4(I), I=1,79)
      WRITE(*,*)
      WRITE(*,*) 'File header (top 4 records in file):'
      WRITE(*,'(1X,79A1)') (HEAD1(I), I=1,79)
      WRITE(*,'(1X,79A1)') (HEAD2(I), I=1,79)
      WRITE(*,'(1X,79A1)') (HEAD3(I), I=1,79)
      WRITE(*,'(1X,79A1)') (HEAD4(I), I=1,79)
      READ(5,'(79A1)',ERR=605) (DATA1(I), I=1,79)
      WRITE(*,*)
      WRITE(*,*) 'First data record:'
      WRITE(*,'(1X,79A1)') (DATA1(I), I=1,79)
      WRITE(*,*)
      BACKSPACE 5

C-----Read number of columns in file
      NUM=0
      IPL=0
      DO 10 I=1,79
        IF (HEAD3(I).EQ.' ') THEN
          IF (IPL.GT.0) GOTO 15
          GOTO 10
        ENDIF
        ICH=ICHAR(HEAD3(I))-48
        IF ((ICH.GE.0).AND.(ICH.LE.9)) THEN
          NUM=(NUM*(10**IPL))+ICH
          IPL=IPL+1
          IF (NUM.GT.999) GOTO 15
        ENDIF
      10  CONTINUE

15  IF ((NUM.LT.2).OR.(NUM.GT.15)) THEN
17    WRITE(*,'(A33,$)') ' Number of columns in data file: '
16    READ(*,'(I4)',IOSTAT=IERR) NUM
      IF (IERR.NE.0) THEN
        WRITE(*,*) ' value must be an integer.....'
        WRITE(*,'(4X,A11,$)') 'try again: '
        GOTO 16
      ENDIF
      IF (NUM.EQ.0) GOTO 1
      IF ((NUM.LT.2).OR.(NUM.GT.15)) THEN
        WRITE(*,*) ' number of columns out of range.....'
        WRITE(*,'(4X,A11,$)') 'try again: '
        GOTO 16
      ENDIF
    ENDIF
    NCOL=NUM

C-----Read data
      WRITE(*,120) NCOL,TMPNAM
      DO 20 J=1,1000
        READ(5,*,END=25,ERR=605) (DATA(J,I), I=1,NCOL)
20    CONTINUE
        CLOSE(5)
        WRITE(*,165)
165  FORMAT(' ...>1000 values;',/1X,
+        ' should remainder be dropped (y/n): ', $)
      READ(*,'(A1)') YORN
      IF((YORN.NE.'Y').AND.(YORN.NE.'y')) GOTO 6

```

```

25  CLOSE(5)
    NROW=J-1
    WRITE(*,122) NROW
120  FORMAT(/16X,'...reading ',12,' columns from file ',A32)
122  FORMAT(16X,'...end of file after ',14,' values'/)

    FILNAM(1:1)=TMPNAM(1:1)
    CALL LCASE(TMPNAM)
    FILNAM(2:64)=TMPNAM(2:64)
    READIN=.TRUE.

    WRITE(*,*)
    RETURN

C-----Error trapping code
605  WRITE(*,*)'          ...file error.....',CHAR(7),CHAR(7)
    WRITE(*,110)
    READIN=.FALSE.
110  FORMAT(4X,'Enter input filename (or ''Quit''):',$,)
    GOTO 5

END

C*****
C*****

SUBROUTINE SCAN

    IMPLICIT REAL*8 (A-H,O-Z)
    REAL*4 DATA
    CHARACTER*64 FILNAM,OUTFIL,LSTOUT,FTITLE
    CHARACTER*1  HEAD1,HEAD2,HEAD3,HEAD4

    COMMON/DATAIN/DATA(1000,15)
    COMMON/FILINFO/FILNAM,OUTFIL,LSTOUT,FTITLE,NCOL,NROW,
+      HEAD1(79),HEAD2(79),HEAD3(79),HEAD4(79)

C-----Find out how many rows to scan
    WRITE(*,*)
1    WRITE(*,'(A,$)')' Number of rows to scan: '
16   READ(*,'(I4)',ERR=600) N
    IF(N.GT.NROW) N=NROW
    WRITE(*,*)
    IF(N.LE.0) RETURN

C-----Print n lines of file
C-----Start with 4 header lines
    WRITE(*,'(1X,79A1)') (HEAD1(I), I=1,79)
    WRITE(*,'(1X,79A1)') (HEAD2(I), I=1,79)
    WRITE(*,'(1X,79A1)') (HEAD3(I), I=1,79)
    WRITE(*,'(1X,79A1)') (HEAD4(I), I=1,79)

C-----Continue with all data lines
    DO 10 I=1,N
        WRITE(*,*)
        DO 20 J=1,NCOL
            A=FLOAT(J)
            IF ((A/8).EQ.INT(A/8)) THEN
                WRITE(*,*)
                WRITE(*,'(1X,A,$)') ' '
            ENDIF
            WRITE(*,100) DATA(I,J)
100        FORMAT(' ',G10.3,$)
        20  CONTINUE
        10  CONTINUE
    WRITE(*,*)

    RETURN

C-----Error trapping code
600  WRITE(*,*)' Value must be an integer;'
    WRITE(*,'(4X,A11,$)') 'try again: '
    GOTO 16
END

C*****
C*****

```

```

SUBROUTINE UCASE(STRING)

CHARACTER*64 STRING

C-----Convert lower case letters to uppercase
DO 10 I=1,64
  IC=ICHAR(STRING(I:1))
  IF((IC.GE.97).AND.(IC.LE.122)) THEN
    STRING(I:1)=CHAR(IC-32)
  ENDIF
10 CONTINUE

RETURN
END

C*****
C*****

SUBROUTINE LCASE(STRING)

CHARACTER*64 STRING

C-----Convert uppercase letters to lowercase
DO 10 I=1,64
  IC=ICHAR(STRING(I:1))
  IF((IC.GE.65).AND.(IC.LE.90)) THEN
    STRING(I:1)=CHAR(IC+32)
  ENDIF
10 CONTINUE

RETURN
END

C*****
C*****

SUBROUTINE KRIGE

IMPLICIT REAL*8 (A-H,O-Z)
INTEGER XCOL,YCOL,ZCOL,OUT
CHARACTER*1 HEAD1,HEAD2,HEAD3,HEAD4,Q,YORN
CHARACTER*64 FILNAM,OUTFIL,LSTOUT,HRDFIL,FTITLE,ZLABEL
LOGICAL TWODIM,CHECK,BOUND,HERC,LOG,HAAN,ERROR,
+ HRDGRD,YESOUT,JACK,SELF

DIMENSION FN(101,101),BG(101),BF(101),NBRLOC(100)

COMMON/DATACOLS/X(1000),Y(1000),Z(1000)
COMMON/FILINFO/FILNAM,OUTFIL,LSTOUT,FTITLE,NCOL,NROW,
+ HEAD1(79),HEAD2(79),HEAD3(79),HEAD4(79)
COMMON/GENPARAM/NR,NRGRID,TWODIM,HERC,CHECK,HAAN,LOG,BOUND,
+ OFF,XCOL,YCOL,ZCOL,ZLABEL,TZMN,TZVAR,UZMN,UZVAR,
+ BZMN,BZVAR,XMIN,XMAX,YMIN,YMAX,GXMIN,GXMAX,
+ GYMIN,GYMAX,NRTOT
COMMON/PUNPARAM/XINC,YINC,RNBHD,RNBMAX,MAXNBR,MODEL,
+ CO,C9,A9,HRDGRD,HRDFIL,JACK,SELF

C-----If first time through, see if need to call setupn
IF(XCOL.GT.0) THEN
  WRITE(*,105)
105 FORMAT(/1X,'Reset run parameters? (y/n): ', $)
  READ(*,'(A1)') YORN
  ELSE
    YORN='Y'
  ENDIF

31 IF ((YORN.EQ.'Y').OR.(YORN.EQ.'y')) THEN
C-----Set run parameters: x,y,z cols, data grid, etc.
  CALL SETUPN

  ELSEIF((YORN.NE.'N').AND.(YORN.NE.'n')) THEN
    WRITE(*,*) 'answer Y or N only.....'
    WRITE(*,'(7X,A11,$)') 'try again: '
    READ(*,'(A1)') YORN
    GOTO 31

```

```

ENDIF

C-----Ask for how to define neighbor search
CALL DEFNEIGH(.FALSE.)

C-----Determine how to get interpolation points
CALL DEFPTS

C-----Determine interpolation grid boundaries (not dataset bounds)
CALL INTBOUNDS(HRDGRD)

C-----Calculate stats
CALL STATS

C-----Get output file
CALL GETOUT(OUT)
IF(OUT.NE.0) YESOUT=.TRUE.

C-----Start writing to output file
CALL TEXT1OUT(OUT,'P')
IF(JACK.OR.SELF) THEN
  IF(JACK) THEN
    WRITE(OUT,*) 'Jackknife (Cross-Validation) Analysis'
    WRITE(OUT,'(1X,A,A)') 'NB: Measured values for a given ',
+    'coordinate point are NOT used in the interpolated'
    WRITE(OUT,*) '  estimate for that coordinate point.'
  ELSE
    WRITE(OUT,*) 'Self-fit Analysis'
    WRITE(OUT,'(1X,A,A)') 'NB: Measured values for a given ',
+    'coordinate point ARE used in the interpolated'
    WRITE(OUT,*) '  estimate for that coordinate point.'
  ENDIF
  WRITE(OUT,'(1X,A,A)') 'NB: Analysis includes only those ',
+  'measured points within the interpolation bounds'
  IF(LOG.AND.(.NOT.HAAN)) WRITE(OUT,'(5X,A,A)') 'Neither ',
+  'measured nor interpolated values are backtransformed'
  IF(TWODIM) THEN
    WRITE(OUT,280)
  ELSE
    WRITE(OUT,282)
  ENDIF
ELSE
  IF(TWODIM) THEN
    WRITE(OUT,290)
  ELSE
    WRITE(OUT,292)
  ENDIF
ENDIF
280 FORMAT(/1X,4X,'X',10X,'Y',10X,'Measured Z',8X,'Estimated Z',
+ 8X,'Std Dev',4X,'Neighbors')
282 FORMAT(/1X,4X,'X',10X,'Measured Z',8X,'Estimated Z',
+ 8X,'Std Dev',7X,'Neighbors')
290 FORMAT(1X,4X,'X',10X,'Y',12X,'Est Z',8X,'Std Dev',
+ 11X,'Neighbors')
292 FORMAT(1X,4X,'X',12X,'Est Z',8X,'Std Dev',
+ 11X,'Neighbors')

C-----Give first part of status report
IF(YESOUT) THEN
  Q=CHAR(8)
  WRITE(*,*)
  WRITE(*,'(1X,A29,A16,$)') '  ...calculating grid point',
+
  IF(TWODIM) WRITE(*,602) '
602 FORMAT('+',A8,$)
ENDIF

C-----Initialize gridpoints
IF (HRDGRD) THEN
40 OPEN(7,FILE=HRDFIL,STATUS='OLD',IOSTAT=IERR)
  IF (IERR.NE.0) THEN
    WRITE(*,*) '  ...file error file ',HRDFIL,CHAR(7),CHAR(7)
    WRITE(*,'(1X,A,$)') '  ...continue? (y/n): '
    READ(*,'(A1)') YORN
    IF((YORN.EQ.'Y').OR.(YORN.EQ.'y')) GOTO 40
    RETURN
  ENDIF

```

```

ELSE
  IF(TWODIM) THEN
    XPT=GXMIN
    YPT=GYMIN-YINC
  ELSE
    XPT=GXMIN-XINC
    YPT=GYMIN
  ENDIF
ENDIF

C-----Initialize stat accumulators
I=0
NZ=0
ZESUM=0
ZESUM2=0
ZVSUM=0
ZSSUM=0
ZISUM=0
ZISUM2=0
ZEZI=0

C=====C
C                                     C
C          START OF MAIN KRIGING LOOP          C
C=====C

C-----Get gridpoint; if XPT=-99, finish up
30  I=I+1
    IF(JACK.OR.SELF)THEN
      IF(I.GT.NR) GOTO 77
      XPT=X(I)
      IF((XPT.LT.GXMIN).OR.(XPT.GT.GXMAX)) GOTO 30
      IF(TWODIM) THEN
        YPT=Y(I)
        IF((YPT.LT.GYMIN).OR.(YPT.GT.GYMAX)) GOTO 30
      ENDIF
      ZI=Z(I)
    ELSE
      CALL NEXTPT(XPT,YPT)
      IF (XPT.EQ.-99.) GOTO 77
    ENDIF
    ZE=-99
    ZV=-99
    ZS=-99

C-----Status report to screen
    IF(YESOUT) THEN
      IF (.NOT.TWODIM) THEN
        WRITE(*,600) (Q,K=1,16),XPT,I
600    FORMAT(16A,F7.1,' (' ,I6,')',)$)
      ELSE
        WRITE(*,601) (Q,K=1,24),XPT,YPT,I
601    FORMAT(24A,F7.1,' ',F7.1,' (' ,I6,')',)$)
      ENDIF
    ENDIF

C-----Get nearest 100 neighbors for point I
76  CALL GETNBRS(XPT,YPT,NNBRS,NBRLOC)
    IF(NNBRS.EQ.0) GOTO 99
    NEW=NNBRS+1

C-----Calculate the matrix FN
    CALL CALCFN(FN,NNBRS,NBRLOC,TZVAR)

C-----Compute the matrix BG
    CALL CALCBG(XPT,YPT,BG,NNBRS,NBRLOC)
    DO 65 J=1,NEW
      BF(J)=BG(J)
65  CONTINUE
    CALL SIMUL(FN,BG,NEW,ERROR)
    IF (ERROR) GOTO 99

C-----Determine the Z-value for the input coordinate
    ZE=CALCZ(NNBRS,NBRLOC,BG)

```

```

C-----Determine the Estimation Variance for this coordinate
      ZV=CALCVAR(NNBRS,BG,BF,TZVAR)
      IF(ZV.LT.0) THEN
        ZV=-99.
        ZS=-99.
        GOTO 99
      ELSE
        ZS=ZV**.5
      ENDIF
C-----Backtransform and write the results to the output file
      IF(LOG.AND.HAAN) THEN
        ZE= DEXP(ZE+0.5*ZV)-OFF
        ZV= UZMN**2 *(DEXP(TZVAR))*(1-DEXP(-ZV))
        IF(ZV.LT.0) THEN
          ZE=-99.
          ZV=-99.
          ZS=-99.
          GOTO 99
        ELSE
          ZS=ZV**.5
        ENDIF
      ENDIF

C-----Accumulate average ZE & ZV stats
      NZ=NZ+1
      ZESUM=ZESUM+ZE
      ZESUM2=ZESUM2+ZE**2
      ZSSUM=ZSSUM+ZS
      IF(JACK.OR.SELF) THEN
        IF(LOG.AND.HAAN) ZI= DEXP(ZI)-OFF
        ZISUM=ZISUM+ZI
        ZISUM2=ZISUM2+ZI**2
        ZEZI=ZEZI+ZE*ZI
      ENDIF

99  IF((JACK.OR.SELF).AND.TWODIM) THEN
      WRITE(OUT,250) XPT,YPT,ZI,ZE,ZS,NNBRS
    ELSEIF((JACK.OR.SELF).AND.(.NOT.TWODIM)) THEN
      WRITE(OUT,252) XPT,ZI,ZE,ZS,NNBRS
    ELSEIF((.NOT.JACK).AND.(.NOT.SELF).AND.TWODIM) THEN
      WRITE(OUT,260) XPT,YPT,ZE,ZS,NNBRS
    ELSEIF((.NOT.JACK).AND.(.NOT.SELF).AND.(.NOT.TWODIM)) THEN
      WRITE(OUT,262) XPT,ZE,ZS,NNBRS
    ENDIF

250  FORMAT(1X,G10.4,1X,G10.4,1X,G16.5,1X,G16.5,1X,G16.5,1X,I5)
252  FORMAT(1X,G10.4,1X,G16.5,1X,G16.5,1X,G16.5,1X,I5)
260  FORMAT(1X,G10.4,1X,G10.4,1X,G16.5,1X,G16.5,1X,I5)
262  FORMAT(1X,G10.4,1X,G16.5,1X,G16.5,1X,I5)

C-----Return to the top and get the next point
      GOTO 30

C=====C
C
C      END OF MAIN KRIGING LOOP
C
C=====C

77  WRITE(OUT,*)

C-----Calculate summary stats
C      Note use of T-1 rather than T below
C      Note that if jack first zimm= for successfully estimated points;
C      2nd zimm for all measured Z's in interpolation grid
      IF(NZ.GT.1) THEN
        T=DBLE(NZ)
        ZEVAR=(ZESUM2-(T*ZEMN**2))/(T-1)
        IF((JACK.OR.SELF)) THEN
          CORR=-99.
          ZIMN=ZISUM/T
          ZIVAR=(ZISUM2-(T*ZIMN**2))/(T-1)
          COV=(ZEZI-(ZISUM*ZESUM)/T)/(T-1)
          IF((ZEVAR.GE.0).AND.(ZIVAR.GE.0))
            CORR=COV/((ZEVAR**.5)*(ZIVAR**.5))
          +
          WRITE(OUT,*)
          WRITE(OUT,*) 'Covariance between measured and ',

```

```

+      'successfully estimated Z's: ',SNGL(COV)
      WRITE(OUT,*) 'Correlation coefficient (r): ',SNGL(CORR)
    ENDIF
  ELSE
    WRITE(OUT,780)
780    FORMAT(//1X,'Less than 2 estimated Z's successfully ',
+      'calculated.'//)
  ENDIF

  RETURN

END

```

```

C*****
C*****

```

# SUBROUTINE NBHDANAL

```

IMPLICIT REAL*8 (A-H,O-Z)
INTEGER      XCOL,YCOL,ZCOL,OUT
CHARACTER*1  HEAD1,HEAD2,HEAD3,HEAD4,YORN,Q,JTYPE
CHARACTER*64 FILNAM,OUTFIL,LSTOUT,HRDFIL,FTITLE,ZLABEL
LOGICAL      TWODIM,CHECK,BOUND,HERC,LOG,HAAN,ERROR,
+            HRDGRD,YESOUT,FRESH,JACK,SELF

DIMENSION FN(101,101),BG(101),BF(101),NBRLOC(100)

COMMON/DATACOLS/X(1000),Y(1000),Z(1000)
COMMON/FILINFO/FILNAM,OUTFIL,LSTOUT,FTITLE,NCOL,NROW,
+  HEAD1(79),HEAD2(79),HEAD3(79),HEAD4(79)
COMMON/GENPARAM/NR,NRGRID,TWODIM,HERC,CHECK,HAAN,LOG,BOUND,
+  OFF,XCOL,YCOL,ZCOL,ZLABEL,TZMN,TZVAR,UZMN,UZVAR,
+  BZMN,BZVAR,XMIN,XMAX,YMIN,YMAX,GXMIN,GXMAX,
+  GYMIN,GYMAX,NRTOT
COMMON/PUNPARAM/XINC,YINC,RNBHD,RNBMAX,MAXNBR,MODEL,
+  CO,C9,A9,HRDGRD,HRDFIL,JACK,SELF

```

```

C-----If first time through, see if need to call setpun
FRESH=.FALSE.
IF(XCOL.EQ.0) THEN
  FRESH=.TRUE.
ELSE
  WRITE(*,105)
105  FORMAT(//1X,'Reset run parameters? (y/n): ',)
  READ(*,'(A1)') YORN
ENDIF

```

```

31 IF (FRESH.OR.(YORN.EQ.'Y').OR.(YORN.EQ.'y')) THEN
  CALL SETPUN
  CALL DEFNEIGH(.TRUE.)
  CALL INTBOUNDS(.FALSE.)
  CALL STATS
ELSEIF((YORN.NE.'N').AND.(YORN.NE.'n')) THEN
  WRITE(*,*) '      answer Y or N only.....'
  WRITE(*,'(7X,A1,$)') 'try again: '
  READ(*,'(A1)') YORN
  GOTO 31
ENDIF

```

```

HRDGRD=.FALSE.
SELF=.FALSE.
JACK=.TRUE.

```

```

C-----Get output file; if different from last or new setpun, write head
CALL GETOUT(OUT)
IF(OUT.NE.0) YESOUT=.TRUE.
IF((OUTFIL.NE.LSTOUT).OR.FRESH) CALL TEXT1OUT(OUT,'N')

```

```

C-----Start writing NBHDANAL info to output file
WRITE(OUT,*)
WRITE(OUT,*) 'Neighborhood Estimation Analysis'
WRITE(OUT,'(1X,A,A)') 'NB: Points are jackknifed. Measured ',
+  'values for a given coordinate point are NOT used in'
WRITE(OUT,*) 'the interpolated estimate for that point.'
WRITE(OUT,'(1X,A,A)') 'NB: Analysis includes only those ',
+  'measured points within the interpolation bounds.'
IF(LOG.AND.(.NOT.HAAN)) WRITE(OUT,*) 'Neither measured ',
+  'nor interpolated values are backtransformed.'

```

```

WRITE(OUT,286)
WRITE(OUT,288)
286 FORMAT(/1X,'Max ',1X,'Max ',1X,'Interpolated ',
+ 1X,'Measured ',4X,'Reduced Error ',
+ 1X,'Absolute Error ',4X,'Reduced Error ',
+ 3X,' r ')
288 FORMAT(1X,'N''brs',1X,'Radius ',
+ 1X,'Mean Std Dev ',4X,'Mean Std Dev ',
+ 1X,' N ',1X,'Covariance ',
+ 1X,'Mean Std Dev ',4X,'Mean Std Dev ')
WRITE(OUT,*)
WRITE(OUT,'(35X,A,A)') '--- Maximum Number of Neighbors ',
+ 'Incremented ---'

```

C-----Give first part of status report

```

IF(YESOUT) THEN
  Q=CHAR(8)
  WRITE(*,*)
  WRITE(*,'(1X,A29,A24,$)') ' ...calculating grid point',
+
  IF(TWOIM) WRITE(*,602) '
602 FORMAT('+',A8,$)
ENDIF

```

```

C=====C
C                                     C
C          START OF MAIN NEIGHBORHOOD LOOP          C
C                                                     C
C=====C

```

C-----Start loop through different neighborhood parameters

```

JJ=0
DO 510 II=3,12
  MAXNBR=MIN(NR-1,100)
  RNBHD=RNBMAX

  IF(II.LE.6) THEN
    MAXNBR=2**II
    IF(MAXNBR.GT.NR-1) MAXNBR=NR-1
    IF(MAXNBR.EQ.MAXOLD) THEN
      JJ=JJ+NRGRID
      GOTO 510
    ENDIF
    MAXOLD=MAXNBR
  ELSEIF(II.EQ.7) THEN
    MAXNBR=100
    IF(MAXNBR.GT.NR-1) MAXNBR=NR-1
    IF(MAXNBR.EQ.MAXOLD) THEN
      JJ=JJ+NRGRID
      GOTO 510
    ENDIF
    MAXOLD=MAXNBR
  ELSEIF(II.EQ.8) THEN
    WRITE(OUT,*)
    WRITE(OUT,'(38X,A)')
+    '--- Neighborhood Radius Incremented ---'
    RNBHD=RNBMAX*.05
  ELSEIF(II.EQ.9) THEN
    RNBHD=RNBMAX*.10
  ELSEIF(II.EQ.10) THEN
    RNBHD=RNBMAX*.25
  ELSEIF(II.EQ.11) THEN
    RNBHD=RNBMAX*.50
  ELSEIF(II.EQ.12) THEN
    RNBHD=RNBMAX*.75
  ENDIF
510

```

C-----Initialize Cross-validation stats

```

ABSUM=0
ABSUM2=0
REDSUM=0
REDS2=0
ZESUM=0
ZESUM2=0
ZISUM=0

```

```

ZISUM2=0
ZEZI=0
NZ=0

```

C-----Calculate zest and zvar for every point in INTERPOLATION grid

```

DO 500 I=1,NR
  ZE=-99
  ZV=-99
  ZS=-99
  ZI=Z(I)
  XPT=X(I)
  IF((XPT.LT.GXMIN).OR.(XPT.GT.GXMAX)) GOTO 500
  IF(TWODIM) THEN
    YPT=Y(I)
    IF((YPT.LT.GYMIN).OR.(YPT.GT.GYMAX)) GOTO 500
  ENDIF

```

C-----Status report to screen

```

  JJ=JJ+1
  IF(YESOUT) THEN
    IF (.NOT.TWODIM) THEN
      WRITE(*,600) (Q,K=1,24),XPT,JJ,NRGRID*16
      FORMAT(24A,F7.1,' (' ,15,' of ',15,')',,$)
    ELSE
      WRITE(*,601) (Q,K=1,32),XPT,YPT,JJ,NRGRID*16
      FORMAT(32A,F7.1,' ',F7.1,' (' ,15,' of ',15,')',,$)
    ENDIF
  ENDIF

```

C-----Get nearest MAXNBR neighbors for point I

```

  76 CALL GETNBR(XPT,YPT,NNBR,NBRLOC)
  IF(NNBR.EQ.0) GOTO 500
  NEW=NNBR+1

```

C-----Calculate the matrix FN

```

  CALL CALCFN(FN,NNBR,NBRLOC,TZVAR)

```

C-----Compute the matrix BG

```

  CALL CALCBG(XPT,YPT,BG,NNBR,NBRLOC)
  DO 65 J=1,NEW
    BF(J)=BG(J)
  65 CONTINUE
  CALL SIMUL(FN,BG,NEW,ERROR)
  IF (ERROR) GOTO 500

```

C-----Determine the Z-value for the input coordinate

```

  ZE=CALCZ(NNBR,NBRLOC,BG)

```

C-----Determine the Estimation Variance for this coordinate

```

  ZV=CALCVAR(NNBR,BG,BF,TZVAR)
  IF(ZV.LT.0) THEN
    ZV=-99.
    ZE=-99.
    ZS=-99.
    GOTO 500
  ELSE
    ZS=ZV**.5
  ENDIF

```

C-----Backtransform and write the results to the output file

```

  IF(LOG.AND.HAAN) THEN
    ZI=DEXP(ZI)-OFF
    ZE=DEXP(ZE+0.5*ZV)-OFF
    ZV=UZMN**2*(DEXP(TZVAR))*(1-DEXP(-ZV))
    IF(ZV.LT.0) THEN
      ZV=-99.
      ZE=-99.
      ZS=-99.
      GOTO 500
    ELSE
      ZS=ZV**.5
    ENDIF
  ENDIF

```

C-----Cross-validation stats

```

  NZ=NZ+1
  ZESUM=ZESUM+ZE

```

```

ZESUM2=ZESUM2+ZE**2
ZISUM=ZISUM+ZI
ZISUM2=ZISUM2+ZI**2
ZEZ1=ZEZ1+ZE*ZI
ABSUM=ABSUM+(ZE-ZI)
ABSUM2=ABSUM2+(ZE-ZI)**2
IF(ZV.GT.0) THEN
    T=(ZE-ZI)/ZV**.5
    REDSUM=REDSUM+T
    REDS2=REDS2+T**2
ENDIF

```

C-----Return to the top and get the next point  
500 CONTINUE

C-----Calculate neighborhood estimation stats for this nbr defn

C Note use of T-1 rather than T for variance terms

```

IF(NZ.GT.1) THEN
    ZESTD=-99.
    ZISTD=-99.
    REDSTD=-99.
    CORR=-99.
    T=DBLE(NZ)
    ZEMN=ZESUM/T
    ZEVAR=(ZESUM2-(T*ZEMN**2))/(T-1)
    IF(ZEVAR.GE.0) ZESTD=ZEVAR**.5
    ZIMN=ZISUM/T
    ZIVAR=(ZISUM2-(T*ZIMN**2))/(T-1)
    IF(ZIVAR.GE.0) ZISTD=ZIVAR**.5
    COV=(ZEZ1-(ZISUM*ZESUM)/T)/(T-1)
    IF((ZESTD.NE.-99.).AND.(ZISTD.NE.-99.))
        + CORR=COV/(ZESTD*ZISTD)
    ABSMN=ABSUM/T
    ABSVAR=(ABSUM2-(T*ABSMN**2))/(T-1)
    IF(ABSVAR.GE.0) ABSSTD=ABSVAR**.5
    REDMN=REDSUM/T
    REDVAR=(REDS2-(T*REDMN**2))/(T-1)
    IF(REDVAR.GE.0) REDSTD=REDVAR**.5

```

C-----Print neighborhood estimation stats

```

WRITE(OUT,290) MAXNBR,RNBHD,ZIMN,ZISTD,ZEMN,ZESTD,
+ NZ,COV,ABSMN,ABSSTD,REDMN,RESTD,CORR
290 FORMAT(1X,I4,1X,5(G11.3),1X,I4,1X,5(G11.3),1X,F7.3)
ENDIF

```

C-----Get next neighborhood definition

510 CONTINUE

```

C=====C
C
C          END OF MAIN NEIGHBORHOOD LOOP
C
C=====C

```

77 RETURN  
END

C\*\*\*\*\*  
C\*\*\*\*\*

SUBROUTINE SETPUN

```

IMPLICIT REAL*8 (A-H,O-Z)
REAL*4 DATA
INTEGER XCOL,YCOL,ZCOL
CHARACTER*1 YORN,ANSW,HEAD1,HEAD2,HEAD3,HEAD4
CHARACTER*64 FILNAM,OUTFIL,LSTOUT,HRDFIL,FTITLE,ZLABEL
LOGICAL TWODIM,CHECK,BOUND,HERC,LOG,HAAN,THERE,
+ HRDGRD,JACK,SELF

COMMON/DATIN/DATA(1000,15)
COMMON/DATACOLS/X(1000),Y(1000),Z(1000)
COMMON/FILINFO/FILNAM,OUTFIL,LSTOUT,FTITLE,NCOL,NROW,
+ HEAD1(79),HEAD2(79),HEAD3(79),HEAD4(79)
COMMON/GENPARAM/NR,NRGRID,TWODIM,HERC,CHECK,HAAN,LOG,BOUND,
+ OFF,XCOL,YCOL,ZCOL,ZLABEL,TZMN,TZVAR,UZMN,UZVAR,
+ BZMN,BZVAR,XMIN,XMAX,YMIN,YMAX,GXMIN,GXMAX,

```

```

+          GYMIN,GYMAX,NRTOT
COMMON/PUNPARAM/XINC,YINC,RNBHD,RNBMAX,MAXNBR,MODEL,
+          CO,C9,A9,HRDGRD,HRDFIL,JACK,SELF

```

C-----Get the number of dimensions

```

WRITE(*,*)
WRITE(*,'(A38,$)') ' Enter number of dimensions (1 or 2): '
5  READ(*,*,IOSTAT=IERR) N
   IF((IERR.NE.0).OR.((N.NE.1).AND.(N.NE.2))) THEN
     WRITE(*,'(4X,A,$)') 'enter 1 or 2 only: '
     GOTO 5
   ELSEIF(N.EQ.1) THEN
     TWODIM=.FALSE.
   ELSEIF (N.EQ.2) THEN
     TWODIM=.TRUE.
   ENDIF

```

C-----Ask user for column numbers for X, Y, and Z and get z label

```

1  IF(.NOT.TWODIM) THEN
   WRITE(*,'(A38,$)') ' column numbers for X,Z: '
2  READ(*,*,IOSTAT=IERR) XCOL,ZCOL
   IF(IERR.NE.0) THEN
     WRITE(*,650)
     GOTO 2
   ENDIF
   YCOL=XCOL
   IF ((XCOL.GT.NCOL).OR.(ZCOL.GT.NCOL)) THEN
     WRITE(*,*) ' value out of range...'
     WRITE(*,'(1X,A,$)') ' re-enter: '
     GOTO 2
   ENDIF
ELSE
   WRITE(*,'(A38,$)') ' column numbers for X,Y,Z: '
3  READ(*,*,IOSTAT=IERR) XCOL,YCOL,ZCOL
   IF(IERR.NE.0) THEN
     WRITE(*,650)
     GOTO 3
   ENDIF
   IF ((XCOL.GT.NCOL).OR.(YCOL.GT.NCOL).OR.(ZCOL.GT.NCOL)) THEN
     WRITE(*,*) ' value out of range...'
     WRITE(*,'(1X,A,$)') ' re-enter: '
     GOTO 3
   ENDIF
ENDIF
WRITE(*,'(A,$)') ' label for Z: '
READ(*,'(A20)') ZLABEL
WRITE(*,*)

```

C-----Put data from proper columns into work arrays

```

K=0
DO 15 I=1,NROW
  IF (DATA(I,XCOL).EQ.-99.0) GOTO 15
  IF (TWODIM.AND.(DATA(I,YCOL).EQ.-99.0)) GOTO 15
  IF (DATA(I,ZCOL).EQ.-99.0) GOTO 15
  K=K+1
  X(K)=DATA(I,XCOL)
  Y(K)=0
  IF(TWODIM) Y(K)=DATA(I,YCOL)
  Z(K)=DATA(I,ZCOL)
15 CONTINUE
IF(K.LE.2) THEN
  WRITE(*,700)
700  FORMAT(14X,'too few valid data in these columns.....',/)
  GOTO 1
ENDIF
NRTOT=K

```

C-----See if user wants only subset of dataset  
CALL BOUNDS

C-----See if user wants a logarithmic transformation of Z  
CALL TRANSFORM

C-----Get the Semivariogram model  
CALL DEFMODEL

RETURN

C-----Error trapping code

650 FORMAT(4X,'numeric input only: ', \$)  
END

C\*\*\*\*\*  
C\*\*\*\*\*

SUBROUTINE DEFPTS

```
IMPLICIT REAL*8 (A-H,O-Z)
INTEGER      XCOL,YCOL,ZCOL
CHARACTER*1  YORN,ANSW,HEAD1,HEAD2,HEAD3,HEAD4
CHARACTER*64 FILNAM,OUTFIL,LSTOUT,HRDFIL,FTITLE,ZLABEL
LOGICAL      TWODIM,CHECK,BOUND,HERC,LOG,HAAN,THERE,
+            HRDGRD,JACK,SELF

COMMON/GENPARAM/NR,NRGRID,TWODIM,HERC,CHECK,HAAN,LOG,BOUND,
+            OFF,XCOL,YCOL,ZCOL,ZLABEL,TZMN,TZVAR,UZMN,UZVAR,
+            BZMN,BZVAR,XMIN,XMAX,YMIN,YMAX,GXMIN,GXMAX,
+            GYMIN,GYMAX,NRTOT
COMMON/PUNPARAM/XINC,YINC,RNBHD,RNBMAX,MAXNBR,MODEL,
+            CO,C9,A9,HRDGRD,HRDFIL,JACK,SELF
```

C-----Define how to acquire interpolation points

```
JACK=.FALSE.
HRDGRD=.FALSE.
SELF=.FALSE.
28 WRITE(*,510)
510 FORMAT(' [C]alculate kriged points, [J]ackknife,/'
+        ' [S]elf-fit or [R]ead from file: ', $)
23 READ(*,'(A1)') ANSW

IF ((ANSW.EQ.'C').OR.(ANSW.EQ.'c')) THEN
  WRITE(*,110)
110  FORMAT(1X,' specify X-axis increment: ', $)
  22  READ(*,*,IOSTAT=IERR) XINC
  IF(IERR.NE.0) THEN
    WRITE(*,650)
    GOTO 22
  ENDIF
  YINC=0
  IF (TWODIM) THEN
    WRITE(*,120)
120  FORMAT(1X,' specify Y-axis increment: ', $)
    24  READ(*,*,IOSTAT=IERR) YINC
    IF(IERR.NE.0) THEN
      WRITE(*,650)
      GOTO 24
    ENDIF
  ENDIF

ELSEIF ((ANSW.EQ.'J').OR.(ANSW.EQ.'j')) THEN
  JACK=.TRUE.

ELSEIF ((ANSW.EQ.'S').OR.(ANSW.EQ.'s')) THEN
  SELF=.TRUE.

ELSEIF ((ANSW.EQ.'R').OR.(ANSW.EQ.'r')) THEN
  HRDGRD=.TRUE.
  WRITE(*,500)
500  FORMAT(' Specify name of file with grid points: ', $)
  READ(*,'(A20)') HRDFIL
  INQUIRE(FILE=HRDFIL,EXIST=THEORE)
  IF (.NOT.THERE) THEN
    WRITE(*,*) ' file not in default directory;'
    GOTO 28
  ENDIF
ELSE
  WRITE(*,650)
  GOTO 23
ENDIF
WRITE(*,*)
RETURN
```

C-----Error trapping code

```
650 FORMAT(4X,'entry error; try again: ', $)
END
```

C\*\*\*\*\*  
C\*\*\*\*\*

# SUBROUTINE TRANSFORM

```
IMPLICIT REAL*8 (A-H,O-Z)
INTEGER      XCOL,YCOL,ZCOL
CHARACTER*1  YORN
CHARACTER*64 ZLABEL
LOGICAL      TWODIM,CHECK,BOUND,HERC,LOG,HAAN

COMMON/DATACOLS/X(1000),Y(1000),Z(1000)
COMMON/GENPARAM/NR,NRGRID,TWODIM,HERC,CHECK,HAAN,LOG,BOUND,
+               OFF,XCOL,YCOL,ZCOL,ZLABEL,TZMN,TZVAR,UZMN,UZVAR,
+               BZMN,BZVAR,XMIN,XMAX,YMIN,YMAX,GXMIN,GXMAX,
+               GYMIN,GYMAX,NRTOT
```

```
20 WRITE(*,105)
105 FORMAT(' Transform Z to logn(z)? (y/n): ', $)
31 READ(*,'(A1)') YORN
IF ((YORN.EQ.'N').OR.(YORN.EQ.'n')) THEN
  LOG=.FALSE.
  HAAN=.FALSE.
ELSEIF ((YORN.EQ.'Y').OR.(YORN.EQ.'y')) THEN
  LOG=.TRUE.
  WRITE(*,106)
106 FORMAT(' Specify a in the expression Z=ln(z+a): ', $)
22 READ(*,*,IOSTAT=IERR) OFF
IF(IERR.NE.0) THEN
  WRITE(*,650)
  GOTO 22
ENDIF

IF((OFF.LT.0).OR.(OFF.GT.9999)) THEN
  WRITE(*,650)
  GOTO 22
ENDIF
```

C-----Count points out of range in SPECIFIED data grid (not entire)

```
NOUTS=0
DO 15 I=1,NR
  IF(Z(I)+OFF.LT.1.0) NOUTS=NOUTS+1
15 CONTINUE
IF(NOUTS.GT.0) THEN
  IF(NR-NOUTS.LT.3) THEN
    WRITE(*,150) NR-NOUTS
150 FORMAT(4X,'too few data (' ,I2,
+         ' ) are >1 before log-n transformation.....')
    WRITE(*,'(4X,A,A,$)') ' continue with ',
+         ' transformation? (y/n): '
    GOTO 31
  ELSE
    WRITE(*,100) NOUTS
100 FORMAT(4X,'N.BG. ',I4,
+         ' Z-values are out of range (<1.0) and')
    WRITE(*,101) NR-NOUTS
101 FORMAT(4X,' will be ignored; there remain',I4,
+         ' values;')
16 WRITE(*,102)
102 FORMAT(4X,' is this ok? (y/n): ', $)
    READ(*,'(A1)') YORN
    IF((YORN.NE.'Y').AND.(YORN.NE.'y')) GOTO 20
    WRITE(*,*)
  ENDIF
ENDIF

WRITE(*,107)
107 FORMAT(' Specify if want [H]aan or [N]o '
+         ' backtransformation: ', $)
21 READ(*,'(A1)') YORN
IF ((YORN.EQ.'H').OR.(YORN.EQ.'h')) THEN
  HAAN=.TRUE.
ELSEIF ((YORN.EQ.'N').OR.(YORN.EQ.'n')) THEN
```

```

      HAAN=.FALSE.
    ELSE
      WRITE(*, '(7X,A24,$)') 'answer H or N only.....'
      GOTO 21
    ENDIF

```

C-----Transform data in work arrays

```

      K=0
      DO 18 I=1,NR
        IF(Z(I)+OFF.LT.1.0) GOTO 18
        K=K+1
        X(K)=X(I)
        Y(K)=Y(I)
        Z(K)=DLOG(Z(I)+OFF)
      18 CONTINUE
      NR=K
    ELSE
      WRITE(*, '(4X,A,$)') ' answer y or n only: '
      GOTO 31
    ENDIF
    WRITE(*,*)
    RETURN

```

C-----Error trapping code

```

650 FORMAT(7X,'value out of range.....',/14X,'try again: ', $)

END

```

```

C*****
C*****

```

SUBROUTINE BOUNDS

C-----Gets bounds for data set; see INTBOUNDS for interpolation bounds

```

      IMPLICIT REAL*8 (A-H,O-Z)
      INTEGER      XCOL,YCOL,ZCOL
      CHARACTER*1  YORN
      CHARACTER*64 ZLABEL
      LOGICAL      TWODIM,CHECK,BOUND,HERC,LOG,HAAN

      COMMON/DATACOLS/X(1000),Y(1000),Z(1000)
      COMMON/GENPARAM/NR,NRGRID,TWODIM,HERC,CHECK,HAAN,LOG,BOUND,
+      OFF,XCOL,YCOL,ZCOL,ZLABEL,TZMN,TZVAR,UZMN,UZVAR,
+      BZMN,BZVAR,XMIN,XMAX,YMIN,YMAX,GXMIN,GXMAX,
+      GYMIN,GYMAX,NRTOT

```

C-----Determine Xmin,XMAX,Ymin,Ymax (if onedim, all y(i)'s = 0)

```

      XMIN=X(1)
      XMAX=X(1)
      YMIN=Y(1)
      YMAX=Y(1)
      IF(.NOT.TWODIM) THEN
        DO 10 I=2,NRTOT
          XMIN=DMIN1(XMIN,X(I))
          XMAX=DMAX1(XMAX,X(I))
        10 CONTINUE
      ELSE
        DO 20 I=2,NRTOT
          XMIN=DMIN1(XMIN,X(I))
          XMAX=DMAX1(XMAX,X(I))
          YMIN=DMIN1(YMIN,Y(I))
          YMAX=DMAX1(YMAX,Y(I))
        20 CONTINUE
      ENDIF
      TXMIN=XMIN
      TXMAX=XMAX
      TYMIN=YMIN
      TYMAX=YMAX
      NRTMP=NRTOT
      BOUND=.FALSE.

```

C-----Write bounds to screen

```

50 IF(TWODIM) THEN
  WRITE(*,*)'X-Y bounds for dataset:'
  WRITE(*, '(4X,A3,F11.3,A3,F11.3)') 'X: ',TXMIN,' ',TXMAX
  WRITE(*, '(4X,A3,F11.3,A3,F11.3)') 'Y: ',TYMIN,' ',TYMAX

```

```

ELSE
  WRITE(*,*)'Bounds for dataset:'
  WRITE(*, '(4X,A3,F11.3,A3,F11.3)') 'X: ', TXMIN, ' ', TXMAX
ENDIF
WRITE(*,250) NRTMP
250 FORMAT (4X,'Number of valid points: ',I4)

C-----See if user wants subset
WRITE(*, '(4X,A,$)') 'Respecify bounds? (y/n): '
45 READ(*, '(A1)') YORN
46 IF ((YORN.EQ.'Y').OR.(YORN.EQ.'y')) THEN
  WRITE(*,220)
220 FORMAT(7X,'Enter min X and max X (2 values): ', $)
  16 READ(*,*, IOSTAT=IERR) TXMIN, TXMAX
  IF((IERR.NE.0).OR.(TXMIN.GE.TXMAX)) THEN
    WRITE(*,650)
    GOTO 16
  ENDIF
  IF(TXMIN.LT.XMIN) TXMIN=XMIN
  IF(TXMAX.GT.XMAX) TXMAX=XMAX

  IF (TWO DIM) THEN
    WRITE(*,230)
230 FORMAT(7X,'Enter min Y and max Y (2 values): ', $)
    17 READ(*,*, IOSTAT=IERR) TYMIN, TYMAX
    IF((IERR.NE.0).OR.(TYMIN.GE.TYMAX)) THEN
      WRITE(*,650)
      GOTO 17
    ENDIF
    IF(TYMIN.LT.YMIN) TYMIN=YMIN
    IF(TYMAX.GT.YMAX) TYMAX=YMAX
  ENDIF

C-----See if >3 points fall within specified range
C NB if onedim all Y(L)'s = 0, as does TYMIN, TYMAX
NRTMP=0
DO 15 L=1,NRTOT
  IF ((X(L).GE.TXMIN).AND.(X(L).LE.TXMAX).AND.
    + (Y(L).GE.TYMIN).AND.(Y(L).LE.TYMAX)) NRTMP=NRTMP+1
15 CONTINUE
  IF(NRTMP.LE.2) THEN
    WRITE(*,150) NRTMP,CHAR(7),CHAR(7)
150 FORMAT(14X,'...too few data (' ,I2,') within range.....',
    + A,A)
    WRITE(*,*)
    GOTO 49
  ENDIF
  GOTO 50

ELSEIF ((YORN.EQ.'N').OR.(YORN.EQ.'n')) THEN
C-----Fill X,Y,Z vectors if boundaries changed
  IF((XMIN.NE.TXMIN).OR.(XMAX.NE.TXMAX).OR.(YMIN.NE.TYMIN)
    + .OR.(YMAX.NE.TYMAX)) THEN
    XMIN=TXMIN
    XMAX=TXMAX
    YMIN=TYMIN
    YMAX=TYMAX
    K=0
    DO 35 L=1,NRTOT
      IF ((X(L).GE.XMIN).AND.(X(L).LE.XMAX).AND.
        + (Y(L).GE.YMIN).AND.(Y(L).LE.YMAX)) THEN
        K=K+1
        X(K)=X(L)
        Y(K)=Y(L)
        Z(K)=Z(L)
      ENDIF
35 CONTINUE
    BOUND=.TRUE.
    NRTMP=K
  ENDIF
  NR=NRTMP

ELSE
  WRITE(*,*) ' answer either y or n.....'
  WRITE(*, '(4X,A,$)') 'try again: '
  GOTO 45
ENDIF

```

```

      WRITE(*,*)
999  RETURN

C-----Error trapping code
650  FORMAT(7X,'entry error.....',/14X,'try again: ', $)

      END

C*****
C*****

      SUBROUTINE INTBOUNDS(EARLY)

      IMPLICIT REAL*8 (A-H,O-Z)
      INTEGER      XCOL,YCOL,ZCOL
      CHARACTER*1  YORN
      CHARACTER*64 ZLABEL
      LOGICAL      TWODIM,CHECK,BOUND,HERC,LOG,HAAN,EARLY

      COMMON/DATACOLS/X(1000),Y(1000),Z(1000)
      COMMON/GENPARAM/NR,NRGRID,TWODIM,HERC,CHECK,HAAN,LOG,BOUND,
+      OFF,XCOL,YCOL,ZCOL,ZLABEL,TZMN,TZVAR,UZMN,UZVAR,
+      BZMN,BZVAR,XMIN,XMAX,YMIN,YMAX,GXMIN,GXMAX,
+      GYMIN,GYMAX,NRTOT

C-----Set grid boundaries to dataset bounds
      GXMIN=XMIN
      GXMAX=XMAX
      GYMIN=YMIN
      GYMAX=YMAX

      IF(EARLY) THEN
        NRGRID=0
        RETURN
      ENDIF

C-----Write bounds to screen
      WRITE(*,*)'Interpolation Bounds:'
      IF(TWODIM) THEN
        WRITE(*, '(4X,A3,F11.3,A3,F11.3)') 'X: ',GXMIN,' ',GXMAX
        WRITE(*, '(4X,A3,F11.3,A3,F11.3)') 'Y: ',GYMIN,' ',GYMAX
      ELSE
        WRITE(*, '(4X,A3,F11.3,A3,F11.3)') 'X: ',GXMIN,' ',GXMAX
      ENDIF

C-----See how many measured points are within interpolation grid
55  NRGRID=0
      DO 15 I=1,NR
        IF(TWODIM) THEN
          IF((Y(I).GE.GYMIN).AND.(Y(I).LE.GYMAX).AND.
+      (X(I).GE.GXMIN).AND.(X(I).LE.GXMAX)) NRGRID=NRGRID+1
        ELSE
          IF((X(I).GE.GXMIN).AND.(X(I).LE.GXMAX)) NRGRID=NRGRID+1
        ENDIF
      15  CONTINUE
      WRITE(*,250) NRGRID
250  FORMAT (4X,'Number of measured points within bounds: ',I4)

      IF(NRGRID.EQ.0) THEN
        YORN='Y'
        WRITE(*,*) 'Respecify bounds:'
      ELSE
        WRITE(*, '(4X,A,$)') 'Respecify bounds? (y/n): '
        READ(*, '(A1)') YORN
      ENDIF
45  IF ((YORN.EQ.'Y').OR.(YORN.EQ.'y')) THEN
      WRITE(*,220)
220  FORMAT(7X,'Enter min X and max X (2 values): ', $)
      16  READ(*,*,IOSTAT=IERR) GXMIN, GXMAX
          IF(IERR.NE.0) THEN
            WRITE(*,605)
            GOTO 16
          ENDIF
          IF (TWODIM) THEN
            WRITE(*,230)
230  FORMAT(7X,'Enter min Y and max Y (2 values): ', $)

```

```

17      READ(*,*,IOSTAT=IERR) GYMIN,GYMAX
        IF((IERR.NE.0).OR.(GYMIN.GE.GYMAX)) THEN
          WRITE(*,605)
          GOTO 17
        ENDIF
      ENDIF
      GOTO 55

      ELSEIF ((YORN.NE.'N').AND.(YORN.NE.'n')) THEN
        WRITE(*,*) '      answer either y or n.....'
        WRITE(*,'(7X,A,$)') 'try again: '
        READ(*,'(A1)') YORN
        GOTO 45
      ENDIF

      WRITE(*,*)
999  RETURN

C-----Error trapping code
605  FORMAT(7X,'value(s) out of range.....',/14X,'try again: ', $)

      END

C*****
C*****

      SUBROUTINE STATS

      IMPLICIT REAL*8 (A-H,O-Z)
      INTEGER      XCOL,YCOL,ZCOL
      CHARACTER*1   YORN,HEAD1,HEAD2,HEAD3,HEAD4
      CHARACTER*64  HRDFIL,ZLABEL
      LOGICAL       TWODIM,CHECK,BOUND,HERC,LOG,HAAN,THERE,
+                 HRDGRD,JACK,SELF

      COMMON/DATACOLS/X(1000),Y(1000),Z(1000)
      COMMON/GENPARAM/NR,NRGRID,TWODIM,HERC,CHECK,HAAN,LOG,BOUND,
+                 OFF,XCOL,YCOL,ZCOL,ZLABEL,TZMN,TZVAR,UZMN,UZVAR,
+                 BZMN,BZVAR,XMIN,XMAX,YMIN,YMAX,GXMIN,GXMAX,
+                 GYMIN,GYMAX,NRTOT
      COMMON/PUNPARAM/XINC,YINC,RNBHD,RNBMAX,MAXNBR,MODEL,
+                 CO,C9,A9,HRDGRD,HRDFIL,JACK,SELF

C-----NB: STATS is called AFTER transformations
C      TZMN, TZVAR = transformed general mean and var of z
C      UZMN, UZVAR = untransformed

C-----Calculate stats
      SUMZ=0
      SUMZ2=0
      DO 10 I=1,NR
        SUMZ=SUMZ+Z(I)
        SUMZ2=SUMZ2+Z(I)**2
10    CONTINUE

C-----Calculate mean, variance
      T=DBLE(NR)
      TZMN=SUMZ/T
      IF(T.GT.1) TZVAR=(SUMZ2-(T*TZMN**2))/(T-1)

C-----If transformed, get untransformed mean, var
      IF(LOG) THEN
        SUMZ=0
        SUMZ2=0
        DO 20 I=1,NR
          SUMZ=SUMZ+DEXP(Z(I))-OFF
          SUMZ2=SUMZ2+(DEXP(Z(I))-OFF)**2
20    CONTINUE
        UZMN=SUMZ/T
        IF(T.GT.1) UZVAR=(SUMZ2-(T*UZMN**2))/(T-1)
        IF(HAAN) THEN
          BZMN=DEXP(TZMN+0.5*TZVAR)-OFF
          BZVAR=(UZMN**2)*(DEXP(TZVAR)-1)
        ELSE
          BZMN=DEXP(TZMN)-OFF
          BZVAR=DEXP(TZVAR)
        ENDIF
      ENDIF

```

```

ELSE
  UZMN=TZMN
  UZVAR=TZVAR
ENDIF

```

```

RETURN
END

```

```

C*****
C*****

```

```

SUBROUTINE GETOUT(OUT)
C  Gets name of output file, opens

  IMPLICIT REAL*8 (A-H,O-Z)
  INTEGER      XCOL,YCOL,ZCOL,OUT
  CHARACTER*1  YORN,HEAD1,HEAD2,HEAD3,HEAD4
  CHARACTER*64 FILNAM,OUTFIL,FTITLE,ZLABEL,LSTOUT
  LOGICAL      TWODIM,THERE,OPEND,CHECK,HERC,LOG,HAAN,BOUND

  COMMON/FILINFO/FILNAM,OUTFIL,LSTOUT,FTITLE,NCOL,NROW,
+    HEAD1(79),HEAD2(79),HEAD3(79),HEAD4(79)
  COMMON/GENPARAM/NR,NRGRID,TWODIM,HERC,CHECK,HAAN,LOG,BOUND,
+    OFF,XCOL,YCOL,ZCOL,ZLABEL,TZMN,TZVAR,UZMN,UZVAR,
+    BZMN,BZVAR,XMIN,XMAX,YMIN,YMAX,GXMIN,GXMAX,
+    GYMIN,GYMAX,NRTOT

```

```

C-----Get output filename

```

```

10  OUT=6
    INQUIRE (OUT,OPENED=OPEND,NAME=LSTOUT)
    WRITE(*,100)
100 FORMAT(' Output file ([N]one, [A]ppend, or filename): ', $)
    READ(*,'(A64)') OUTFIL
    IF ((OUTFIL.EQ.'N').OR.(OUTFIL.EQ.'n')) THEN
      OUTFIL='NONE'
      CLOSE(OUT)
      OUT=0
    ELSEIF ((OUTFIL.EQ.'A').OR.(OUTFIL.EQ.'a')) THEN
      IF (.NOT.OPEND) THEN
        WRITE(*,*) '   there''s no output file to append to...'
        GOTO 10
      ELSE
        OUTFIL=LSTOUT
        WRITE(OUT,'(//////////)')
      ENDIF
    ELSE
      INQUIRE(FILE=OUTFIL,EXIST=THERE)
      INQUIRE(OUT,OPENED=OPEND)
      IF (THERE) THEN
        WRITE(*,110)
110  +   FORMAT(' File exists;'
        +   /3X,'Do you want to write over it? (y/n): ', $)
12    READ(*,'(A1)') YORN
        IF ((YORN.EQ.'N').OR.(YORN.EQ.'n')) THEN
          GOTO 10
        ELSEIF ((YORN.EQ.'Y').AND.(YORN.EQ.'y')) THEN
          WRITE(*,115)
115  +   FORMAT('   answer either y or n: ', $)
          GOTO 12
        ENDIF
      ENDIF
      IF (OPEND) CLOSE(OUT)
      OPEN(OUT,FILE=OUTFIL,STATUS='NEW',IOSTAT=IERR)
      IF(IERR.NE.0) GOTO 600
    ENDIF

    WRITE(*,*)
70  RETURN

```

```

C-----Error trapping

```

```

600  WRITE(*,*) '          ...file error.....',CHAR(7),CHAR(7)
      WRITE(*,*)
      GOTO 10

END

```

```
C*****
C*****
```

# SUBROUTINE DEFMODEL

```
IMPLICIT REAL*8 (A-H,O-Z)
```

```
CHARACTER*64 HRDFIL
```

```
LOGICAL HRDGRD, JACK, SELF
```

```
COMMON/PUNPARAM/XINC,YINC,RNBHD,RNBMAX,MAXNBR,MODEL,
+ CO,C9,A9,HRDGRD,HRDFIL,JACK,SELF
```

```
WRITE(*,400)
```

```
400 FORMAT(1X,'Specify semivariogram model;',/1X,
+ 'Models available:',/1X,
+ '1 - Linear to range',/1X,
+ 'for H(i) < A, ',
+ 'Gamma(i) = CO+[(C-CO)/A]*H(i)',/1X,
+ '> A, ',
+ 'Gamma(i) = C',/1X,
+ '2 - Spherical',/1X,
+ 'for H < A, ',
+ 'Gamma(i) = CO+(C-CO)*[1.5*(H(i)/A)',
+ '-(0.5*(H(i)/A)**3)]',/1X,
+ '> A, ',
+ 'Gamma(i) = C',/1X,
+ '3 - Exponential',/1X,
+ 'Gamma(i) = CO+(C-CO)*[1-EXP(-H(i)/Ao)]',/1X,
+ '4 - Gaussian',/1X,
+ 'Gamma(i) = CO-(C-CO)*',
+ '[1-EXP(-H(i)**2/(Ao/3**5)**2)]')
WRITE(*,'(1X,A17,$)') 'Enter Choice: '
```

```
28 READ(*,*,IOSTAT=IERR) MODEL
IF(IERR.NE.0) THEN
WRITE(*,605)
GOTO 28
ENDIF
```

```
C9=0
```

```
CO=0
```

```
A9=0
```

```
IF ((MODEL.GE.1).OR.(MODEL.LE.4)) THEN
```

```
34 WRITE(*,'(4X,A,$)') 'Enter CO (nugget variance): '
READ(*,*,IOSTAT=IERR) CO
IF(IERR.NE.0) THEN
WRITE(*,605)
GOTO 34
ENDIF
```

```
36 WRITE(*,'(4X,A,$)') 'C (sill): '
READ(*,*,IOSTAT=IERR) C9
IF(IERR.NE.0) THEN
WRITE(*,605)
GOTO 36
ENDIF
```

```
IF (MODEL.LT.3) THEN
```

```
WRITE(*,'(4X,A,$)') 'A (range): '
```

```
ELSE
```

```
WRITE(*,'(4X,A,$)') 'Ao: '
```

```
ENDIF
```

```
38 READ(*,*,IOSTAT=IERR) A9
IF(IERR.NE.0) THEN
WRITE(*,605)
GOTO 38
ENDIF
```

```
ELSE
```

```
WRITE(*,605)
```

```
GOTO 28
```

```
ENDIF
```

```
WRITE(*,*)
```

```
RETURN
```

```
C-----Error trapping code
```

```
605 FORMAT(7X,'value out of range.....',/14X,'try again: ', $)
```

```
END
```

```
C*****
C*****
```

```
SUBROUTINE DEFNEIGH(EARLY)
```

```
IMPLICIT REAL*8 (A-H,O-Z)
```

```
INTEGER XCOL,YCOL,ZCOL
```

```
CHARACTER*64 HRDFIL,ZLABEL
```

```
LOGICAL TWODIM,CHECK,BOUND,HERC,LOG,HAAN,HRDGRD,
```

```
+ EARLY,JACK,SELF
```

```
COMMON/GENPARAM/NR,NRGRID,TWODIM,HERC,CHECK,HAAN,LOG,BOUND,
```

```
+ OFF,XCOL,YCOL,ZCOL,ZLABEL,TZMN,TZVAR,UZMN,UZVAR,
```

```
+ BZMN,BZVAR,XMIN,XMAX,YMIN,YMAX,GXMIN,GXMAX,
```

```
+ GYMIN,GYMAX,NRTOT
```

```
COMMON/PUNPARAM/XINC,YINC,RNBHD,RNBMAX,MAXNBR,MODEL,
```

```
+ CO,C9,A9,HRDGRD,HRDFIL,JACK,SELF
```

```
C-----Define maximum neighborhood search radius
```

```
DISTX=XMAX-XMIN
```

```
DISTY=YMAX-YMIN
```

```
IF(.NOT.TWODIM) THEN
```

```
    RNBMAX=DSQRT(DISTX**2)
```

```
ELSE
```

```
    RNBMAX=DSQRT(DISTX**2+DISTY**2)
```

```
ENDIF
```

```
WRITE(*,*) 'Neighborhood Definition'
```

```
WRITE(*,210) RNBMAX
```

```
210 FORMAT(1X,'Maximum neighborhood radius is ',G12.3,')'
```

```
RNBHD=RNBMAX
```

```
MAXNBR=MIN(NR-1,100)
```

```
IF(EARLY) GOTO 999
```

```
WRITE(*,560)
```

```
42 READ(*,*,ERR=630) TRNBHD
```

```
560 FORMAT(1X,' specify maximum search radius: ',)$)
```

```
IF(TRNBHD.LE.0) GOTO 630
```

```
IF(TRNBHD.LT.RNBHD) RNBHD=TRNBHD
```

```
WRITE(*,*)
```

```
C-----Define max no. of neighbors to include in neighborhood search
```

```
MAXNBR=MIN(NR,100)
```

```
WRITE(*,552) MAXNBR
```

```
552 FORMAT(1X,'Number of potential neighbors for any search: ',
```

```
+ 13)
```

```
WRITE(*,550) MIN(100,MAXNBR)
```

```
550 FORMAT(1X,' specify maximum (to ',13,'): ',)$)
```

```
32 READ(*,*,ERR=620) MAXNBR
```

```
IF(MAXNBR.LT.1) GOTO 620
```

```
IF(MAXNBR.GT.100) THEN
```

```
    WRITE(*,*)' .....n set to 100;'
```

```
    MAXNBR=100
```

```
ENDIF
```

```
IF(MAXNBR.GT.NR) MAXNBR=NR
```

```
999 WRITE(*,*)
```

```
RETURN
```

```
C-----Error trapping code
```

```
620 WRITE(*,650)
```

```
GOTO 32
```

```
630 WRITE(*,650)
```

```
GOTO 42
```

```
650 FORMAT(4X,'value out of range.....',/4X,'try again: ',)$)
```

```
END
```

```
C*****
C*****
```

```
SUBROUTINE TEXT1OUT(OUT,KTYPE)
```

```
C-----KTYPE specifies type of kriging: P=punctual,
```

```
C N=neighborhood analysis,
```

```
C B=block
```

```

IMPLICIT REAL*8 (A-H,O-Z)
INTEGER      XCOL,YCOL,ZCOL,OUT
CHARACTER*1  HEAD1,HEAD2,HEAD3,HEAD4,Q,KTYPE
CHARACTER*64 FILNAM,OUTFIL,LSTOUT,HRDFIL,FTITLE,ZLABEL
LOGICAL      TWODIM,CHECK,BOUND,HERC,LOG,HAAN,
+            HRDGRD,JACK,SELF,NBANAL

COMMON/FILINFO/FILNAM,OUTFIL,LSTOUT,FTITLE,NCOL,NROW,
+            HEAD1(79),HEAD2(79),HEAD3(79),HEAD4(79)
COMMON/GENPARAM/NR,NRGRID,TWODIM,HERC,CHECK,HAAN,LOG,BOUND,
+            OFF,XCOL,YCOL,ZCOL,ZLABEL,TZMN,TZVAR,UZMN,UZVAR,
+            BZMN,BZVAR,XMIN,XMAX,YMIN,YMAX,GXMIN,GXMAX,
+            GYMIN,GYMAX,NRTOT
COMMON/PUNPARAM/XINC,YINC,RNBHD,RNBMAX,MAXNBR,MODEL,
+            C0,C9,A9,HRDGRD,HRDFIL,JACK,SELF

C-----Start writing to output file
IF(KTYPE.EQ.'B') THEN
  WRITE(OUT,*) 'Block Kriging Output'
ELSEIF(KTYPE.EQ.'P') THEN
  WRITE(OUT,*) 'Punctual Kriging Output'
ELSE
  WRITE(OUT,*) 'Punctual Kriging Neighborhood Analysis Output'
ENDIF
IF(FTITLE.NE.' ') WRITE(OUT,*) 'Run title: ',FTITLE
WRITE(OUT,*) 'Input file: ',FILNAM
WRITE(OUT,204) NCOL,NROW
204  FORMAT(1X,'(',I2,' columns x ',I4,' rows)')
IF(.NOT.TWODIM) THEN
  WRITE(OUT,208) XCOL,ZCOL
208  FORMAT(' X,Z Cols: ',I2,', ',I2)
ELSE
  WRITE(OUT,210) XCOL,YCOL,ZCOL
210  FORMAT(' X,Y,Z Cols: ',I2,', ',I2,', ',I2)
ENDIF
IF(ZLABEL.NE.' ') WRITE(OUT,*) 'Z col label: ',ZLABEL
WRITE(OUT,*) 'Defined Boundaries'
WRITE(OUT,*) '  Data (Measured) Points'
WRITE(OUT,660) XMIN,XMAX
IF(TWODIM) WRITE(OUT,665) YMIN,YMAX
WRITE(OUT,*) '  Interpolated Points'
WRITE(OUT,660) GXMIN,GXMAX
IF(TWODIM) WRITE(OUT,665) GYMIN,GYMAX
660  FORMAT(1X,'      X:',G14.3,' - ',G14.3)
665  FORMAT(1X,'      Y:',G14.3,' - ',G14.3)

WRITE(OUT,*) 'Number of Measured Points'
WRITE(OUT,215) NROW
WRITE(OUT,216) NRTOT
WRITE(OUT,217) NR
IF(.NOT.HRDGRD) WRITE(OUT,218) NRGRID
215  FORMAT(4X,'total in input dataset: ',I4)
216  FORMAT(4X,'total valid in dataset: ',I4)
217  FORMAT(4X,'within dataset bounds: ',I4)
218  FORMAT(4X,'within interpolation bounds: ',I4)

IF(LOG) THEN
  WRITE(OUT,*) 'Z-values log-n transformed:'
  WRITE(OUT,220) OFF
220  FORMAT('      Ln(x+a) where a = ',F6.1)
ENDIF
WRITE(OUT,*) 'General Statistics'
WRITE(OUT,*) '(For all measured points within data boundaries)'
IF(.NOT.LOG) THEN
  WRITE(OUT,630) UZMN
  WRITE(OUT,635) UZVAR
  WRITE(OUT,640) UZVAR**.5
  WRITE(OUT,645) NR
630  FORMAT(1X,'      Mean: ',G14.4)
635  FORMAT(1X,'      Variance: ',G14.4)
640  FORMAT(1X,'      Std. Dev: ',G14.4)
645  FORMAT(1X,'      N: ',I10)
ELSE
  IF(HAAN) THEN
    WRITE(OUT,725)
725  FORMAT(14X,'Untransformed',3X,'Transformed',3X,

```

```

+           'Backtransformed (Haan)')
  ELSE
    WRITE(OUT,726)
726    FORMAT(14X,'Untransformed',3X,'Transformed',3X,
+           'Backtransformed (Std)')
    ENDIF
    WRITE(OUT,730) UZMN,TZMN,BZMN
    WRITE(OUT,735) UZVAR,TZVAR,BZVAR
    WRITE(OUT,740) UZVAR**.5, TZVAR**.5, BZVAR**.5
    WRITE(OUT,745) NR,NR,NR
730    FORMAT(1X,' Mean: ',G14.4,1X,G14.4,1X,G14.4)
735    FORMAT(1X,' Variance: ',G14.4,1X,G14.4,1X,G14.4)
740    FORMAT(1X,' Std. Dev: ',G14.4,1X,G14.4,1X,G14.4)
745    FORMAT(1X,' N: ',I10,1X,I10,1X,I10)
  ENDIF
  WRITE(OUT,*)
  IF(KTYPE.EQ.'B') THEN
    WRITE(OUT,'(1X,A16,F10.3)')'Block width: ',WIDTH
    WRITE(OUT,'(1X,A16,F10.3)')' variance: ',BLVAR
  ELSE
    IF(HRDGRD) WRITE(OUT,*) 'Interpolation gridpoints from ',
+           'file ',HRDFIL
    IF(JACK.OR.SELF) WRITE(OUT,*) 'Interpolation gridpoints same ',
+           'as input file gridpoints'
  ENDIF
  WRITE(OUT,*)
  IF(KTYPE.NE.'N') THEN
    WRITE(OUT,*) 'Neighborhood Definition'
    WRITE(OUT,*) ' Parameter Maximum Used'
    IF(JACK) THEN
      WRITE(OUT,225) NR-1,MAXNBR
    ELSE
      WRITE(OUT,225) NR,MAXNBR
    ENDIF
225    FORMAT(1X,' No. of neighbors:',I5,9X,I5)
    WRITE(OUT,226) RNBMAX,RNBHD
226    FORMAT(1X,' Search radius: ',G11.3,1X,G11.3)
    WRITE(OUT,*)
  ENDIF

  WRITE(OUT,*) 'Semivariogram model'
  IF (MODEL.EQ.1) THEN
    WRITE(OUT,*)'Linear to range:'
    WRITE(OUT,*)' for  $H(i) < A$ ,  $\Gamma(i) = C_0 + [(C-C_0)/A]*H(i)$ '
    WRITE(OUT,*)' > A,  $\Gamma(i) = C$ '
  ELSEIF(MODEL.EQ.2) THEN
    WRITE(OUT,*)'Spherical:'
    WRITE(OUT,*)' for  $H(i) < A$ ,  $\Gamma(i) = C_0 + (C-C_0)*[1.5*(H(i)/A)]$ '
+    WRITE(OUT,*)' > A,  $\Gamma(i) = C$ '
  ELSEIF(MODEL.EQ.3) THEN
    WRITE(OUT,*)'Exponential'
    WRITE(OUT,*)'  $\Gamma(i) = C_0 + (C-C_0)*[1-EXP(-H(i)/A_0)]$ '
  ELSEIF(MODEL.EQ.4) THEN
    WRITE(OUT,*)'Gaussian'
    WRITE(OUT,*)'  $\Gamma(i) =$ 
+    '  $C_0 - (C-C_0)*[1-EXP(-H(i)**2/(A/3**.5)**2)]$ '
  ENDIF
  WRITE(OUT,*)' where  $C_0 =$  ',SNGL(C0)
  WRITE(OUT,*)' C = ',SNGL(C9)
  IF(MODEL.LT.3) THEN
    WRITE(OUT,*)' A = ',SNGL(A9)
  ELSE
    WRITE(OUT,*)' A_0 = ',SNGL(A9)
  ENDIF
  WRITE(OUT,*)

  WRITE(OUT,*) 'Interpolation Output'
  IF(LOG) THEN
    IF(HAAN) THEN
      WRITE(OUT,*) 'N.B. Krige estimates backtransformed ',
+           '(Haan 1977)'
    ELSE
      WRITE(OUT,*) 'N.B. Krige estimates not backtransformed'
    ENDIF
  ENDIF
  RETURN

```

END

```
C*****
C*****
```

```
SUBROUTINE GETNBRS(XPT,YPT,NBRS,NBLOC)
```

```
IMPLICIT REAL*8 (A-H,O-Z)
```

```
REAL*4      DIST(1000),DNEAR(100)
```

```
INTEGER     XCOL,YCOL,ZCOL,NBLOC(100)
```

```
LOGICAL     TWODIM,LOG,HERC,CHECK,HAAN,HRDGRD,BOUND,JACK,SELF
```

```
CHARACTER*64 HRDFIL,ZLABEL
```

```
COMMON/DATACOLS/X(1000),Y(1000),Z(1000)
```

```
COMMON/GENPARAM/NR,NRGRID,TWODIM,HERC,CHECK,HAAN,LOG,BOUND,
+               OFF,XCOL,YCOL,ZCOL,ZLABEL,TZMN,TZVAR,UZMN,UZVAR,
+               BZMN,BZVAR,XMIN,XMAX,YMIN,YMAX,GXMIN,GXMAX,
+               GYMIN,GYMAX,NRTOT
COMMON/PUNPARAM/XINC,YINC,RNBHD,RNBMAX,MAXNBR,MODEL,
+               CO,C9,A9,HRDGRD,HRDFIL,JACK,SELF
```

```
C-----Find 100 or MAXNBR of nearest neighbors; reject distances > RNBHD;
C      if Jack=.true. XPT,YPT itself ignored (dist.le.1d-7)
```

```
C-----Create array DIST of distance of every element from block center
```

```
DO 110 I=1,NR
  DISTX=(XPT-X(I))**2
  DISTY=(YPT-Y(I))**2
  DIST(I)=SNGL((DISTX+DISTY)**.5)
110 CONTINUE
```

```
C-----Create array NBRLC(MAXNBRS) of addresses of neighborhood points
```

```
C      array DNEAR holds distance for each address; jump out at maxnbrs
NBRS=0
DO 130 I=1,NR
  IF((DIST(I).GT.RNBHD).OR.(JACK.AND.(DIST(I).LE.1D-7))) GOTO 130
  NBRS=NBRS+1
  NBRLC(NBRS)=I
  DNEAR(NBRS)=DIST(I)
  IF(NBRS.EQ.MAXNBR) GOTO 140
130 CONTINUE
```

```
C-----Do an initial sort on DNEAR
```

```
140 CALL SORT(DNEAR,NBRLC,NBRS)
```

```
C-----If no. of neighbors within neighborhood so far =maxneighbors, then
```

```
C      may be more neighbors out there within neighborhood. Now go
C      through remainder of data set to see which of remaining items
C      to include in DNEAR;
C      Since have already found the max no. of nearest neighbors, even
C      if future points are within the neighborhood radius they must be
C      less than the greatest radius thus far encountered to be included
C      as a neighbor; therefore no need to test whether that point is in
C      the neighborhood radius. If there are fewer points within the
C      neighborhood radius than the maxnbr of neighbors, there's no need
C      to sort further.
```

```
IF(NBRS.EQ.MAXNBR) THEN
```

```
DO 150 I=NBRS+1,NR
  IF(DIST(I).GT.DNEAR(NBRS)) GOTO 150
  IF(JACK.AND.(DIST(I).LE.1D-7)) GOTO 150
  NBRLC(NBRS)=I
  DNEAR(NBRS)=DIST(I)
  CALL SORT(DNEAR,NBRLC,NBRS)
150 CONTINUE
ENDIF
```

```
RETURN
```

```
END
```

```
C*****
C*****
```

```
SUBROUTINE SORT(DATA1,DATA2,N)
```

```
C-----Generalized sort routine; sorts on Data1 for N elements; ascending
```

```
C      must specify real or integer
```

```

REAL*4 DATA1(1),SAVE1
INTEGER DATA2(1),SAVE2

IF(N.GE.2) THEN
  DO 20 I=2,N
    DO 10 J=1,I-1
      IF(DATA1(I).GE.DATA1(J)) GOTO 10
      SAVE1=DATA1(I)
      DATA1(I)=DATA1(J)
      DATA1(J)=SAVE1
      SAVE2=DATA2(I)
      DATA2(I)=DATA2(J)
      DATA2(J)=SAVE2
10    CONTINUE
20  CONTINUE
ENDIF

RETURN
END

C*****
C*****

SUBROUTINE NEXTPT(XPT,YPT)

IMPLICIT REAL*8 (A-H,O-Z)
INTEGER XCOL,YCOL,ZCOL
LOGICAL TWODIM,LOG,HAAN,HERC,CHECK,HRDGRD,END,BOUND,JACK,SELF
CHARACTER*64 HRDFIL,ZLABEL

COMMON/GENPARAM/NR,NRGRID,TWODIM,HERC,CHECK,HAAN,LOG,BOUND,
+             OFF,XCOL,YCOL,ZCOL,ZLABEL,TZMN,TZVAR,UZMN,UZVAR,
+             BZMN,BZVAR,XMIN,XMAX,YMIN,YMAX,GXMIN,GXMAX,
+             GYMIN,GYMAX,NRTOT
COMMON/PUNPARAM/XINC,YINC,RNBHD,RNBMAX,MAXNBR,MODEL,
+             C0,C9,A9,HRDGRD,HRDFIL,JACK,SELF

C-----Determine the next coordinate pair to be kriged
IF (HRDGRD) THEN
  IF (.NOT.TWODIM) THEN
    YPT=-99.
    READ(7,*,END=99,IOSTAT=IERR) XPT
    IF(IERR.NE.0) THEN
      WRITE(*,*)' File error, file ',HRDFIL',';'
      GOTO 99
    ENDIF
    IF((XPT.GE.GXMIN).AND.(XPT.LE.GXMAX)) NRGRID=NRGRID+1
  ELSE
    READ(7,*,END=99,IOSTAT=IERR) XPT,YPT
    IF(IERR.NE.0) THEN
      WRITE(*,*)' File error, file ',HRDFIL',';'
      GOTO 99
    ENDIF
    IF((YPT.GE.GYMIN).AND.(YPT.LE.GYMAX).AND.
+      (XPT.GE.GXMIN).AND.(XPT.LE.GXMAX)) NRGRID=NRGRID+1
  ENDIF
  RETURN
99  CLOSE(7)
  XPT=-99.
  RETURN

ELSEIF (TWODIM) THEN
  IF (YPT+YINC.LE.GYMAX) THEN
    YPT=YPT+YINC
  ELSE
    IF (XPT+XINC.LE.GXMAX) THEN
      XPT=XPT+XINC
      YPT=GYMIN
    ELSE
      XPT=-99
    ENDIF
  ENDIF
ELSE

```

```

      IF ((XPT+XINC).LE.GXMAX) THEN
        XPT=XPT+XINC
      ELSE
        XPT=-99.
      ENDIF

```

```

      ENDIF
999 RETURN

```

```

      END

```

```

C*****
C*****

```

```

      DOUBLE PRECISION FUNCTION GAMMA(H)

```

```

      IMPLICIT REAL*8 (A-H,O-Z)
      INTEGER      XCOL,YCOL,ZCOL
      LOGICAL      HRDGRD,CHECK,TWO DIM,LOG,HAAN,HERC,BOUND,JACK,SELF
      CHARACTER*64 HRDFIL,ZLABEL

```

```

      COMMON/GENPARAM/NR,NRGRID,TWO DIM,HERC,CHECK,HAAN,LOG,BOUND,
+      OFF,XCOL,YCOL,ZCOL,ZLABEL,TZMN,TZVAR,UZMN,UZVAR,
+      BZMN,BZVAR,XMIN,XMAX,YMIN,YMAX,GXMIN,GXMAX,
+      GYMIN,GYMAX,NRTOT
      COMMON/PUNPARAM/XINC,YINC,RNBHD,RNBMAX,MAXNBR,MODEL,
+      CO,C9,A9,HRDGRD,HRDFIL,JACK,SELF

```

```

C-----Determine the value GAMMA
C      NB: Although if h.ge.A9 below evaluates to GAMMA=TZVAR-CO,
C      float point processing mandates using full equation to avoid crash

```

```

      IF(MODEL.EQ.1) THEN
        IF (H.LT.A9) GAMMA=TZVAR-(CO+((C9-CO)/A9)*H)
        IF (H.GE.A9) GAMMA=TZVAR-(CO+((C9-CO)/A9)*A9)

```

```

      ELSEIF(MODEL.EQ.2) THEN
        IF (H.LT.A9) GAMMA=TZVAR-(CO+(C9-CO)*(1.5*(H/A9)-
+      0.5*((H/A9)**3)))
        IF (H.GE.A9) GAMMA=TZVAR-(CO+(C9-CO)*(1.5*(A9/A9)-
+      0.5*((A9/A9)**3)))

```

```

      ELSEIF(MODEL.EQ.3) THEN
        GAMMA=TZVAR-(CO+(C9-CO)*(1-DEXP(-H/A9)))

```

```

      ELSEIF(MODEL.EQ.4) THEN
        GAMMA=TZVAR-(CO-(C9-CO)*(1-DEXP(-(H**2/(A9/3**.5)**2))))

```

```

      ENDIF

```

```

999 RETURN
      END

```

```

C*****
C*****

```

```

      SUBROUTINE SIMUL(FN,BG,NRANK,ERROR)

```

```

      IMPLICIT REAL*8 (A-H,O-Z)
      REAL*8 FN(101,101),BG(101)
      LOGICAL ERROR

```

```

      ERROR=.FALSE.

```

```

C-----Perform outer loop from row 1 to 1 < the rank(NRANK) of the matrix
      DO 5 LL=1,NRANK-1
        IF (ABS(FN(LL,LL)).GT.1D-7) THEN
          PIVOT = 1.0/FN(LL,LL)
          DO 10 I=LL+1,NRANK
            R=FN(I,LL)*PIVOT
            DO 15 J=I,NRANK
              FN(J,I)=FN(J,I)-(FN(J,LL)*R)
15          CONTINUE
              BG(I)=BG(I)-(BG(LL)*R)
10          CONTINUE
        ELSE
          ERROR=.TRUE.

```

```

      RETURN
    ENDIF
5    CONTINUE

    DO 20 LL=NRANK,1,-1
      IF (FN(LL,LL).NE.0.0) THEN
        BG(LL)=BG(LL)/FN(LL,LL)
        IF (LL.GT.1) THEN
          DO 25 J=1,LL-1
            BG(J)=BG(J)-(BG(LL)*FN(LL,J))
25          CONTINUE
        ENDIF
      ELSE
        ERROR=.TRUE.
        RETURN
      ENDIF
20    CONTINUE

999  RETURN
    END

```

```

C*****
C*****

```

```

      SUBROUTINE CALCBG(XPT,YPT,BG,NNBRS,NBRLOC)

```

```

      IMPLICIT REAL*8 (A-H,O-Z)
      REAL*8      BG(101)
      INTEGER     NBRLOC(100)

```

```

      COMMON/DATACOLS/X(1000),Y(1000),Z(1000)

```

```

C----Determine the matrix BG

```

```

      BG(NNBRS+1) = 1.0
      DO 10 I=1,NNBRS
        IP=NBRLOC(I)
        DISTX=X(IP)-XPT
        DISTY=Y(IP)-YPT
        DD=DSQRT(DISTX**2+DISTY**2)
        BG(I) = GAMMA(DD)

```

```

10    CONTINUE

```

```

      RETURN
      END

```

```

C*****
C*****

```

```

      SUBROUTINE CALCFN(FN,NNBRS,NBRLOC,TZVAR)

```

```

      IMPLICIT REAL*8 (A-H,O-Z)
      REAL*8      FN(101,101)
      INTEGER     NBRLOC(100)
      LOGICAL     JACK,SELF,HRDGRD
      CHARACTER*64 HRDFIL

```

```

      COMMON/DATACOLS/X(1000),Y(1000),Z(1000)

```

```

      COMMON/PUNPARAM/XINC,YINC,RNBHD,RNBMAX,MAXNBR,MODEL,
+      CO,C9,A9,HRDGRD,HRDFIL,JACK,SELF

```

```

C----Initialize the matrix

```

```

      DO 10 I=1,NNBRS+1
        DO 15 J=1,NNBRS+1
          FN(I,J)=0.0

```

```

15    CONTINUE

```

```

10    CONTINUE

```

```

      FN(1,1) = TZVAR-CO

```

```

C----Start calculations for FN

```

```

      DO 20 I=2,NNBRS
        J2=I-1
        IP1=NBRLOC(I)
        DO 25 J=1,J2
          IP2=NBRLOC(J)
          DISTX = X(IP1) - X(IP2)
          DISTY = Y(IP1) - Y(IP2)

```

```

        DD = DSQRT(DISTX**2+DISTY**2)
        FN(I,J) = GAMMA(DD)
        FN(J,I) = FN(I,J)
25      CONTINUE
20      CONTINUE

C-----Finish off the outer row and column of FN
      DO 30 I=1,NNBRS
        FN(I,1) = FN(1,1)
        FN(NNBRS+1,I) = 1.0
        FN(I,NNBRS+1) = 1.0
30      CONTINUE
        FN(NNBRS+1,NNBRS+1) = 0.0

      RETURN
      END

C*****
C*****
      DOUBLE PRECISION FUNCTION CALCZ(NNBRS,NBRLOC,BG)

      IMPLICIT REAL*8 (A-H,O-Z)
      REAL*8 BG(101)
      INTEGER NBRLOC(100)

      COMMON/DATACOLS/X(1000),Y(1000),Z(1000)

C-----Calculate the Z estimate
      ZX=0.0
      DO 10 I=1,NNBRS
        IKR=NBRLOC(I)
        ZX=BG(I)*Z(IKR)+ZX
10      CONTINUE

C-----Final Result
      CALCZ=ZX

      RETURN
      END

C*****
C*****
      DOUBLE PRECISION FUNCTION CALCVAR(NNBRS,BG,BF,TZVAR)

      IMPLICIT REAL*8 (A-H,O-Z)
      REAL*8 BG(101),BF(101)

C-----Determine the estimation variance
      TCVAR=0.0
      DO 10 I=1,NNBRS+1
        TCVAR=TCVAR-(BG(I)*BF(I))
10      CONTINUE

C-----Final estimation variance
      CALCVAR=TCVAR+TZVAR

      RETURN
      END

C*****
C*****
C***** End of Punctual.for *****
C*****
C*****
C*****

```

Punctual Kriging output file Punctual.out

# Punctual Kriging Output

Run title: Sample run: Punctual krig

Input file: Sample.prn

( 3 columns x 256 rows)

X,Y,Z Cols: 1, 2, 3

Z col label: Zvariate

Defined Boundaries

Data (Measured) Points

X: .200 - 79.9

Y: .000 - 79.4

Interpolated Points

X: .200 - 79.9

Y: .000 - 79.4

Number of Measured Points

total in input dataset: 256

total valid in dataset: 248

within dataset bounds: 248

within interpolation bounds: 248

Z-values log-n transformed:

Ln(x+a) where a = 1.0

General Statistics

(For all measured points within data boundaries)

|           | Untransformed | Transformed | Backtransformed (Haan) |
|-----------|---------------|-------------|------------------------|
| Mean:     | .3977         | .3242       | .3972                  |
| Variance: | .4575E-01     | .2054E-01   | .3284E-02              |
| Std. Dev: | .2139         | .1433       | .5730E-01              |
| N:        | 248           | 248         | 248                    |

Neighborhood Definition

| Parameter         | Maximum | Used |
|-------------------|---------|------|
| No. of neighbors: | 248     | 32   |
| Search radius:    | 113.    | 113. |

Semivariogram model

Spherical:

for  $H(i) < A$ ,  $\Gamma(i) = C0 + (C - C0) * [1.5 * (H(i)/A)]$

> A,  $\Gamma(i) = C$

where  $C0 = 1.227000E-002$

$C = 2.388000E-002$

$A = 67.7400000$

Interpolation Output

N.B. Krig estimates backtransformed (Haan 1977)

| X     | Y     | Est Z  | Std Dev    | Neighbors |
|-------|-------|--------|------------|-----------|
| .2000 | .0000 | .60135 | .46148E-01 | 32        |
| .2000 | 9.000 | .42850 | .46396E-01 | 32        |
| .2000 | 18.00 | .51865 | .46693E-01 | 32        |
| .2000 | 27.00 | .71307 | .46469E-01 | 32        |
| .2000 | 36.00 | .55273 | .46127E-01 | 32        |
| .2000 | 45.00 | .42876 | .46104E-01 | 32        |
| .2000 | 54.00 | .66840 | .46238E-01 | 32        |
| .2000 | 63.00 | .58036 | .45223E-01 | 32        |
| .2000 | 72.00 | .37591 | .46132E-01 | 32        |
| 9.200 | .0000 | .40787 | .46699E-01 | 32        |
| 9.200 | 9.000 | .50066 | .44847E-01 | 32        |
| 9.200 | 18.00 | .45957 | .45795E-01 | 32        |
| 9.200 | 27.00 | .50209 | .45380E-01 | 32        |
| 9.200 | 36.00 | .56083 | .45865E-01 | 32        |
| 9.200 | 45.00 | .39099 | .45094E-01 | 32        |
| 9.200 | 54.00 | .41370 | .45845E-01 | 32        |
| 9.200 | 63.00 | .44520 | .44686E-01 | 32        |
| 9.200 | 72.00 | .41106 | .46104E-01 | 32        |
| 18.20 | .0000 | .28832 | .46831E-01 | 32        |
| 18.20 | 9.000 | .19571 | .45190E-01 | 32        |
| 18.20 | 18.00 | .33388 | .45774E-01 | 32        |
| 18.20 | 27.00 | .25824 | .45394E-01 | 32        |
| 18.20 | 36.00 | .24784 | .45596E-01 | 32        |
| 18.20 | 45.00 | .37807 | .45872E-01 | 32        |
| 18.20 | 54.00 | .67118 | .45119E-01 | 32        |
| 18.20 | 63.00 | .50163 | .45547E-01 | 32        |
| 18.20 | 72.00 | .58608 | .45387E-01 | 32        |
| 27.20 | .0000 | .14714 | .46340E-01 | 32        |
| 27.20 | 9.000 | .16204 | .45867E-01 | 32        |
| 27.20 | 18.00 | .15237 | .45484E-01 | 32        |

|       |       |        |            |    |
|-------|-------|--------|------------|----|
| 27.20 | 27.00 | .22282 | .45688E-01 | 32 |
| 27.20 | 36.00 | .24220 | .46080E-01 | 32 |
| 27.20 | 45.00 | .28579 | .44969E-01 | 32 |
| 27.20 | 54.00 | .28433 | .45233E-01 | 32 |
| 27.20 | 63.00 | .44551 | .44572E-01 | 32 |
| 27.20 | 72.00 | .46334 | .45463E-01 | 32 |
| 36.20 | .0000 | .24031 | .46828E-01 | 32 |
| 36.20 | 9.000 | .26554 | .46124E-01 | 32 |
| 36.20 | 18.00 | .15954 | .45094E-01 | 32 |
| 36.20 | 27.00 | .16166 | .45831E-01 | 32 |
| 36.20 | 36.00 | .35656 | .44780E-01 | 32 |
| 36.20 | 45.00 | .30276 | .45486E-01 | 32 |
| 36.20 | 54.00 | .33613 | .45362E-01 | 32 |
| 36.20 | 63.00 | .41905 | .45899E-01 | 32 |
| 36.20 | 72.00 | .38987 | .45499E-01 | 32 |
| 45.20 | .0000 | .19481 | .45633E-01 | 32 |
| 45.20 | 9.000 | .17672 | .44970E-01 | 32 |
| 45.20 | 18.00 | .52518 | .45244E-01 | 32 |
| 45.20 | 27.00 | .32074 | .44998E-01 | 32 |
| 45.20 | 36.00 | .26264 | .46036E-01 | 32 |
| 45.20 | 45.00 | .38807 | .45834E-01 | 32 |
| 45.20 | 54.00 | .32501 | .45084E-01 | 32 |
| 45.20 | 63.00 | .36678 | .45333E-01 | 32 |
| 45.20 | 72.00 | .42684 | .45531E-01 | 32 |
| 54.20 | .0000 | .21460 | .46069E-01 | 32 |
| 54.20 | 9.000 | .24851 | .44885E-01 | 32 |
| 54.20 | 18.00 | .32794 | .45064E-01 | 32 |
| 54.20 | 27.00 | .34807 | .45889E-01 | 32 |
| 54.20 | 36.00 | .30492 | .45440E-01 | 32 |
| 54.20 | 45.00 | .27368 | .45614E-01 | 32 |
| 54.20 | 54.00 | .23761 | .45645E-01 | 32 |
| 54.20 | 63.00 | .77784 | .45412E-01 | 32 |
| 54.20 | 72.00 | .28997 | .45614E-01 | 32 |
| 63.20 | .0000 | .21475 | .45653E-01 | 32 |
| 63.20 | 9.000 | .26617 | .46345E-01 | 32 |
| 63.20 | 18.00 | .20112 | .45296E-01 | 32 |
| 63.20 | 27.00 | .34343 | .45785E-01 | 32 |
| 63.20 | 36.00 | .60978 | .46059E-01 | 32 |
| 63.20 | 45.00 | .45818 | .45619E-01 | 32 |
| 63.20 | 54.00 | .62323 | .44642E-01 | 32 |
| 63.20 | 63.00 | .52122 | .45728E-01 | 32 |
| 63.20 | 72.00 | 1.1983 | .45185E-01 | 32 |
| 72.20 | .0000 | .28995 | .45931E-01 | 32 |
| 72.20 | 9.000 | .32103 | .45080E-01 | 32 |
| 72.20 | 18.00 | .33788 | .45603E-01 | 32 |
| 72.20 | 27.00 | .50718 | .45670E-01 | 32 |
| 72.20 | 36.00 | .51250 | .45498E-01 | 32 |
| 72.20 | 45.00 | .53438 | .46004E-01 | 32 |
| 72.20 | 54.00 | .42795 | .45607E-01 | 32 |
| 72.20 | 63.00 | .67666 | .45466E-01 | 32 |
| 72.20 | 72.00 | .62523 | .45169E-01 | 32 |

File Block.hlp; to accompany

Program Block.for,  
Block Kriging Analysis  
Version 11.10.86 Copyright (c) 1986 G.P. Robertson

The correct citation for this program is  
Robertson, G.P. 1987. Geostatistics in ecology: interpolating  
with known variance. Ecology 68:

Later releases of this program available from: Computer Services Laboratory  
W.K. Kellogg Biol. Station  
Michigan State University  
Hickory Corners, MI 49060.

#### Program parameters:

1. Hardware requirements. This version was written in Microsoft Fortran version 3.3 designed to run under the IBM MS-DOS 2.0+ operating system. Compilation by other compilers compatible with the ANSI 77 standard should be possible.

2. Data Input. Data is read into the program as ASCII characters in free format from a user-specified file. The first 4 lines of the input file are treated as header lines -- they should not contain data. If the first characters of the third line are numeric, they are assumed to represent the number of columns in each data record. A sample header:

```
Line 1: File xxxxx.prn from supporting files xxyyy.ext and xxxyy.ext;
2: Small grid samples taken 5/19....
3: 15 columns: Sample#, Xcor, Ycor, z1,z2,z3,z4,z5,
4:      z6,z7,z8,z9,z10,z11,z12.
5: 1 0 15 4.3 2.11 .0003 -99. 2.3 3 5 4 3 2 2 1.9997
```

If the column no. value on line 3 is not correct or if there are different numbers of columns in any row, the data will not be read correctly and calculations will be incorrect. Missing values are represented by the value -99. Data size limitations are 15 columns x 1000 rows, though redimensioning key variables will allow indefinite input file sizes.

3. Output. Output data is written to a user-specified output file or to the screen if no output file is specified. All data is ASCII format and can be subsequently printed or read into another program.

#### 4. User-specified prompts:

- a) Main menu; a) read data file; see limitations above;  
b) scan current data set; use cntrl-s to halt scrolling;  
c) block kriging analysis;  
d) help; this output;  
e) exit program;
- b) input file name; conform to MSDOS convention;
- c) run title; as desired for labeling output graphs; 64 char. max;
- d) number of dimensions; either 1 or 2;
- e) x,z or x,y,z columns: columns in which x coordinates, y coordinates, and active z-value can be found;
- f) z-label: as desired for labeling output, 64 char. max;
- g) use subset of data set; to use only part of the input (measured) data grid in the interpolation analysis;
- h) transform z-value; if requested, z is logn-transformed with the option of adding a constant to each value before transforming; because of the discontinuous nature of this distribution over the range <-1 to >1, all values <1.0 are ignored for the duration of the analysis; note that the transformation lasts only until the next Punctual menu; the statistics output give back-transformed values (Haan 1977) if requested -- see note below;
- i) specify semivariogram model; 4 models are available: linear to specified range, spherical, exponential, and gaussian. Model parameters are CO (y-intercept), C (sill value), and A (range in the case of the

linear and spherical models) or  $A_0$  (some factor of range in exponential and gaussian models). These model parameters can be taken directly from the output of the semivariogram program after running it through SAS's nonlinear estimation routines;

- j) neighborhood parameters; user must provide a) the maximum number of neighbors  $M$  to use for interpolating any given grid point (100 max), and b) the maximum radius within which to search for neighbors (up to the maximum distance separating any two points to be interpolated). All neighbors within the maximum radius are sorted by distance and the nearest  $M$  are used for the interpolation. Higher  $M$ 's increase processing time substantially.
- k) use subset of interpolation grid; if only part of the interpolation grid is to be calculated; note that points in the measured data grid that are outside the interpolation grid may be used in the interpolation of these points if they satisfy the neighborhood requirements.

- l) specify output file;  $N$  = results are not read to output file, appear on screen only;  
 $A$  = appends results to last output file opened;  
 $f$  = name of new output file; if file exists, can write over it or append to it as specified;

N.B. Read carefully the annotations on the output file; where the back-transformation of transformed values was requested, Haan's (1977) method is used, where the backtransformed mean =  $\exp([\text{mean of logn values}] + 0.5 * \text{var of logn values}) - A$ ; and the backtransformed variance =  $([\text{mean of untransformed values}]^2 * (\exp[\text{var of logn values}] - 1))$ . Where  $A$  = the constant added to original values before  $\ln$  transformation in order to bring original values to  $>1.0$  before  $\ln$  transformation. (See Haan, C.T. 1977. Chapter 6. Some continuous probability distributions. Statistical Methods in Hydrology. The Iowa State Univ. Press, Ames, Iowa.)

\$storage:2

PROGRAM BLOCK

C Version 11.10.86  
 C Copyright (c) 1986 G.P. Robertson. All rights reserved.

C The correct citation for this program is Robertson, G.P. 1987.  
 C Geostatistics in ecology: interpolating with known variance.  
 C Ecology 68:(in press).

C This program is being maintained at the Computer Services Laboratory  
 C W.K. Kellogg Biological Station  
 C Michigan State University  
 C Hickory Corners, MI 49060.

C Please report significant bugs and well-documented enhancements  
 C to this address for inclusion in later versions.

C Documentation for users appears in file Block.hlp.

C Subroutines: DATREAD, SCAN, UCASE, LCASE, BLKRIG, SETBLK, BOUNDS,  
 C TRANSFORM, INTBOUNDS, DEFBMODEL, DEFBNEIGH, STATS, GETOUT,  
 C TEXTBOUT, BLKVAR, BLCOV, GETBNBRS, SORT, GAMMAB, SIMULB

C-----Variable list

| C NAME    | FUNCTION                                   |
|-----------|--------------------------------------------|
| C ----    | -----                                      |
| C FILNAM  | input data file                            |
| C OUTFIL  | file where output data sent                |
| C PRESOUT | last output file named (used in appending) |
| C FTITLE  | run title                                  |
| C ZLABEL  | z-variable title                           |
| C XCOL    | column in filnam with x-coordinate values  |
| C YCOL    | column with y-coordinate values            |
| C ZCOL    | column with z-coordinate values            |
| C XMAX    | greatest x-coordinate                      |
| C XMIN    | least x-coordinate                         |
| C YMAX    | greatest y-coordinate                      |
| C YMIN    | least y-coordinate                         |
| C GXMAX   | greatest interpolation grid x-coord        |
| C GYMAX   | greatest interp. grid y-coord              |
| C GXMIN   |                                            |
| C GYMIN   |                                            |
| C LOG     | log transformation? (logical)              |
| C HAAN    | back-transform using Haan (1977) (logical) |
| C NR      | number of valid data elements              |
| C RNBHD   | radius of neighborhood (user defined)      |
| C RNBMAX  | maximum radius neighborhood (data defined) |
| C MAXNBR  | maximum no. of neighbors (user defined)    |
| C MODEL   | semivariogram model                        |
| C C0      | y-intercept of semivariogram               |
| C C9      | C of semivariogram model                   |
| C A9      | A of semivariogram model                   |
| C NXBL    | no. of blocks in x direction               |
| C NYBL    | y direction                                |
| C XBL     | x coordinate for center of current block   |
| C YBL     | y coordinate for center of current block   |

IMPLICIT REAL\*8 (A-H,O-Z)  
 REAL\*4 DATA  
 INTEGER CHOICE,XCOL,YCOL,ZCOL,BL  
 CHARACTER\*64 FILNAM,OUTFIL,LSTOUT,FTITLE,ZLABEL  
 CHARACTER\*1 HEAD1,HEAD2,HEAD3,HEAD4,LINE(79)  
 LOGICAL TWODIM,LOG,HAAN,HERC,BOUND,READIN,CHECK,OPEND,THERE

COMMON/DATIN/DATA(1000,15)  
 COMMON/DATACOLS/X(1000),Y(1000),Z(1000)  
 COMMON/FILINFO/FILNAM,OUTFIL,LSTOUT,FTITLE,NCOL,NROW,  
 + HEAD1(79),HEAD2(79),HEAD3(79),HEAD4(79)  
 COMMON/GENPARAM/NR,NRGRID,TWODIM,HERC,CHECK,HAAN,LOG,BOUND,  
 + OFF,XCOL,YCOL,ZCOL,ZLABEL,TZMN,TZVAR,UZMN,UZVAR,  
 + BZMN,BZVAR,XMIN,XMAX,YMIN,YMAX,GXMIN,GXMAX,  
 + GYMIN,GYMAX,NRTOT  
 COMMON/BLKPARAM/RNBHD,RNBMAX,MAXNBR,MODEL,C0,C9,A9,  
 + WIDTH,NXBL,NYBL,BLVAR

```

C-----Write menu header
DO 3 I=1,5
  WRITE(*,*)
3  CONTINUE
  WRITE(*,*)'Program Block'
  WRITE(*,*)' Block Kriging Analysis'
  WRITE(*,*)' Version 11.10.86'
  WRITE(*,*)' '
  WRITE(*,*)'See file Block.hlp and source code listing'
  WRITE(*,*)' for documentation and copyright information'
  WRITE(*,*)' (//1X,A,$)')'Hit <return> to continue.....'
  READ(*, '(A1)') YORN
  WRITE(*, ' (//////////1X)')

  READIN=.FALSE.
C-----Choose function
1  WRITE(*,*)
  CHECK=.FALSE.
  IF (.NOT.READIN) THEN
    WRITE(*,400) 'None'
  ELSE
    WRITE(*,400) FILNAM
    WRITE(*,405) NCOL
    WRITE(*,410) NROW
  ENDIF
400 FORMAT(/1X,'Current file: ',A16)
405 FORMAT(1X,' number of columns:',I3)
410 FORMAT(1X,' number of rows: ',I5)

  WRITE(*,*)
  WRITE(*,*)'Choose a function:'
  WRITE(*,*)' 1. Read in data file'
  WRITE(*,*)' 2. Scan current data set'
  WRITE(*,*)' 3. Block kriging analysis'
  WRITE(*,*)' 4. Help'
  WRITE(*,*)' 5. End Program'
  WRITE(*,*)
  WRITE(*, '(4X,A14,$)')'Enter choice: '
2  READ(*,*,ERR=600) CHOICE

  IF (CHOICE.EQ.1) THEN
    CALL DATREAD(READIN)
    IF(.NOT.READIN) GOTO 1
  ELSEIF (CHOICE.EQ.2) THEN
    IF(.NOT.READIN) CALL DATREAD(READIN)
    IF(.NOT.READIN) GOTO 1
    CALL SCAN
  ELSEIF (CHOICE.EQ.3) THEN
    IF (.NOT.READIN) CALL DATREAD(READIN)
    IF(.NOT.READIN) GOTO 1
    CALL BLKRIG
  ELSEIF (CHOICE.EQ.4) THEN
C-----SEE IF HELP FILE PRESENT
    INQUIRE(FILE='BLOCK.HLP', EXIST=THEORE)
    IF (THEORE) THEN
      DO 12 I=1,10
        WRITE(*,*)
12      CONTINUE
      OPEN (7,FILE='BLOCK.HLP',STATUS='OLD')
      DO 11 J=1,24
        READ (7,'(79A1)',END=20) (LINE(I),I=1,79)
        WRITE(*, '(1X,79A1)') (LINE(I),I=1,79)
11      CONTINUE
        WRITE(*, '(20X,A,$)')' (.....hit <return> to continue.....)'
        READ(*, '(A1)') YORN
        GOTO 10
20      CLOSE(7)
        WRITE(*, '(/20X,A,$)')' (.....hit <return> to continue.....)'
        READ(*, '(A1)') YORN
        WRITE(*, ' (//////////1X)')
      ELSE
        WRITE(*,*)' file Block.hlp not in directory...'
      ENDIF
    ELSEIF (CHOICE.EQ.5) THEN
      INQUIRE(6,OPENED=OPEND)
      IF(OPEND) CLOSE(6)

```

```

        WRITE(*,*)
        WRITE(*,*)'Program Block;'
        WRITE(*,*)'Normal termination.'
        WRITE(*,*)
        GOTO 999
    ELSE
        GOTO 600
    ENDIF

    GOTO 1

C-----Error trapping
600 WRITE(*,*) '      entry error.....'
602 WRITE(*, '(7X,A,$)') 'try again: '
    GOTO 2

999 END

C*****
C*****

SUBROUTINE DATREAD(READIN)

C  Data is read in in a free format style by columns; if
C  the no. of columns is not on 3rd header record user is asked for
C  value.

    IMPLICIT REAL*8 (A-H,O-Z)
    REAL*4      DATA
    INTEGER     XCOL,YCOL,ZCOL
    CHARACTER*64 TMPNAM,FILNAM,OUTFIL,LSTOUT,FTITLE,ZLABEL
    CHARACTER*1  HEAD1,HEAD2,HEAD3,HEAD4,DATA1(79),YORN
    LOGICAL      TWODIM,THERE,READIN,LOG,HERC,CHECK,HAAN,BOUND

    COMMON/DATAIN/DATA(1000,15)
    COMMON/FILINFO/FILNAM,OUTFIL,LSTOUT,FTITLE,NCOL,NROW,
+      HEAD1(79),HEAD2(79),HEAD3(79),HEAD4(79)
    COMMON/GENPARAM/NR,NRGRID,TWODIM,HERC,CHECK,HAAN,LOG,BOUND,
+      OFF,XCOL,YCOL,ZCOL,ZLABEL,TZMN,TZVAR,UZMN,UZVAR,
+      BZMN,BZVAR,XMIN,XMAX,YMIN,YMAX,GXMIN,GXMAX,
+      GYMIN,GYMAX,NRTOT

C-----Get input file
1  WRITE(*,*)
6  WRITE(*,100)
5  READ(*, '(A64)') TMPNAM
    CALL UCASE(TMPNAM)
    IF((TMPNAM.EQ.'QUIT').OR.(TMPNAM.EQ.'EXIT').OR.
+      (TMPNAM.EQ.'END').OR.(TMPNAM(1:2).EQ.'NO')) RETURN

C-----See if file exists
    INQUIRE(FILE=TMPNAM,EXIST=THERE)
    IF (.NOT.THERE) THEN
        WRITE(*,105)
        WRITE(*,106)
        GOTO 5
    ENDIF
100 FORMAT(1X,'Enter input filename: ', $)
105 FORMAT(4X,'File does not exist; ',A20)
106 FORMAT(4X,'try again or enter ''Quit'': ', $)

C-----Get file or run title
    WRITE(*, '(A18,$)') ' Enter run title: '
    READ(*, '(A64)') FTITLE

C-----Read header
    OPEN (5, FILE=TMPNAM, STATUS='OLD', ERR=605)
    READ(5, '(79A1)', ERR=605) (HEAD1(I), I=1,79)
    READ(5, '(79A1)', ERR=605) (HEAD2(I), I=1,79)
    READ(5, '(79A1)', ERR=605) (HEAD3(I), I=1,79)
    READ(5, '(79A1)', ERR=605) (HEAD4(I), I=1,79)
    WRITE(*,*)
    WRITE(*,*) 'File header (top 4 records in file):'
    WRITE(*, '(1X,79A1)') (HEAD1(I), I=1,79)
    WRITE(*, '(1X,79A1)') (HEAD2(I), I=1,79)
    WRITE(*, '(1X,79A1)') (HEAD3(I), I=1,79)
    WRITE(*, '(1X,79A1)') (HEAD4(I), I=1,79)

```

```

READ(5,'(79A1)',ERR=605) (DATA1(I), I=1,79)
WRITE(*,*)
WRITE(*,*) 'First data record:'
WRITE(*,'(1X,79A1)') (DATA1(I),I=1,79)
WRITE(*,*)
BACKSPACE 5

```

C-----Read number of columns in file

```

NUM=0
IPL=0
DO 10 I=1,79
  IF (HEAD3(I).EQ.' ') THEN
    IF (IPL.GT.0) GOTO 15
    GOTO 10
  ENDIF
  ICH=ICHAR(HEAD3(I))-48
  IF ((ICH.GE.0).AND.(ICH.LE.9)) THEN
    NUM=(NUM*(10**IPL))+ICH
    IPL=IPL+1
    IF (NUM.GT.999) GOTO 15
  ENDIF
10 CONTINUE

15 IF ((NUM.LT.2).OR.(NUM.GT.15)) THEN
17 WRITE(*,'(A33,$)') ' Number of columns in data file: '
16 READ(*,'(I4)',Iostat=IERR) NUM
  IF (IERR.NE.0) THEN
    WRITE(*,*) ' value must be an integer.....'
    WRITE(*,'(4X,A11,$)') 'try again: '
    GOTO 16
  ENDIF
  IF (NUM.EQ.0) THEN
    CLOSE(5)
    GOTO 1
  ELSEIF ((NUM.LT.2).OR.(NUM.GT.15)) THEN
    WRITE(*,*) ' number of columns out of range.....'
    WRITE(*,'(4X,A11,$)') 'try again: '
    GOTO 16
  ENDIF
ENDIF
NCOL=NUM

```

C-----Read data

```

WRITE(*,120) NCOL,TMPNAM
DO 20 J=1,1000
  READ(5,*,END=25,ERR=605) (DATA(J,I),I=1,NCOL)
20 CONTINUE
  CLOSE(5)
  WRITE(*,165)
165 FORMAT(' ...>1000 values;',/1X,
+ ' should remainder be dropped (y/n): ', $)
  READ(*,'(A1)') YORN
  IF ((YORN.NE.'Y').AND.(YORN.NE.'y')) GOTO 6

25 CLOSE(5)
NROW=J-1
WRITE(*,122) NROW
120 FORMAT(/16X,'...reading ',I2,' columns from file ',A32)
122 FORMAT(16X,'...end of file after ',I4,' values'/)

FILNAM(1:1)=TMPNAM(1:1)
CALL LCASE(TMPNAM)
FILNAM(2:64)=TMPNAM(2:64)
READIN=.TRUE.

WRITE(*,*)
RETURN

```

C-----Error trapping code

```

605 WRITE(*,*) ' ...file error.....',CHAR(7),CHAR(7)
  WRITE(*,110)
  READIN=.FALSE.
110 FORMAT(4X,'Enter input filename (or ''Quit''):', $)
  GOTO 5

END

```

```

C*****
C*****

```

# SUBROUTINE SCAN

```
IMPLICIT REAL*8 (A-H,O-Z)
```

```
REAL*4 DATA
```

```
CHARACTER*64 FILNAM,OUTFIL,LSTOUT,FTITLE
```

```
CHARACTER*1 HEAD1,HEAD2,HEAD3,HEAD4
```

```
COMMON/DATAIN/DATA(1000,15)
```

```
COMMON/FILINFO/FILNAM,OUTFIL,LSTOUT,FTITLE,NCOL,NROW,
+ HEAD1(79),HEAD2(79),HEAD3(79),HEAD4(79)
```

C-----Find out how many rows to scan

```
WRITE(*,*)
```

```
1 WRITE(*,'(A,$)') ' Number of rows to scan: '
```

```
16 READ(*,'(I4)',ERR=600) N
```

```
IF(N.GT.NROW) N=NROW
```

```
WRITE(*,*)
```

```
IF(N.LE.0) RETURN
```

C-----Print n lines of file

C-----Start with 4 header lines

```
WRITE(*,'(1X,79A1)') (HEAD1(I), I=1,79)
```

```
WRITE(*,'(1X,79A1)') (HEAD2(I), I=1,79)
```

```
WRITE(*,'(1X,79A1)') (HEAD3(I), I=1,79)
```

```
WRITE(*,'(1X,79A1)') (HEAD4(I), I=1,79)
```

C-----Continue with all data lines

```
DO 10 I=1,N
```

```
WRITE(*,*)
```

```
DO 20 J=1,NCOL
```

```
A=FLOAT(J)
```

```
IF ((A/8).EQ.INT(A/8)) THEN
```

```
WRITE(*,*)
```

```
WRITE(*,'(1X,A,$)') ' '
```

```
ENDIF
```

```
WRITE(*,100) DATA(I,J)
```

```
FORMAT(' ',G10.3,$)
```

```
100 CONTINUE
```

```
10 CONTINUE
```

```
WRITE(*,*)
```

```
RETURN
```

C-----Error trapping code

```
600 WRITE(*,*) ' Value must be an integer;'
```

```
WRITE(*,'(4X,A11,$)') 'try again: '
```

```
GOTO 16
```

```
END
```

```

C*****
C*****

```

# SUBROUTINE UCASE(STRING)

```
CHARACTER*64 STRING
```

C-----Convert lower case letters to uppercase

```
DO 10 I=1,64
```

```
IC=ICHAR(STRING(I:I))
```

```
IF((IC.GE.97).AND.(IC.LE.122)) THEN
```

```
STRING(I:I)=CHAR(IC-32)
```

```
ENDIF
```

```
10 CONTINUE
```

```
RETURN
```

```
END
```

```

C*****
C*****

```

# SUBROUTINE LCASE(STRING)

```
CHARACTER*64 STRING
```

C-----Convert uppercase letters to lowercase

```
DO 10 I=1,64
  IC=ICHAR(STRING(I:I))
  IF((IC.GE.65).AND.(IC.LE.90)) THEN
    STRING(I:I)=CHAR(IC+32)
  ENDIF
10 CONTINUE

RETURN
END
```

C\*\*\*\*\*  
C\*\*\*\*\*

SUBROUTINE BLKRIG

```
IMPLICIT REAL*8 (A-H,O-Z)
INTEGER      XCOL,YCOL,ZCOL,OUT
CHARACTER*1  HEAD1,HEAD2,HEAD3,HEAD4,Q,YORN
CHARACTER*64 FILNAM,OUTFIL,LSTOUT,HRDFIL,FTITLE,ZLABEL
LOGICAL      TWODIM,CHECK,BOUND,HERC,LOG,HAAN,ERROR,
+            YESOUT

DIMENSION NBRLOC(100),AV(10201),RV(101),GV(101),COV(2,2)

COMMON/DATACOLS/X(1000),Y(1000),Z(1000)
COMMON/FILINFO/FILNAM,OUTFIL,LSTOUT,FTITLE,NCOL,NROW,
+      HEAD1(79),HEAD2(79),HEAD3(79),HEAD4(79)
COMMON/GENPARAM/NR,NRGRID,TWODIM,HERC,CHECK,HAAN,LOG,BOUND,
+      OFF,XCOL,YCOL,ZCOL,ZLABEL,TZMN,TZVAR,UZMN,UZVAR,
+      BZMN,BZVAR,XMIN,XMAX,YMIN,YMAX,GXMIN,GXMAX,
+      GYMIN,GYMAX,NRTOT
COMMON/BLKPARAM/RNBHD,RNBMAX,MAXNBR,MODEL,CO,C9,A9,
+      WIDTH,NXBL,NYBL,BLVAR
```

C-----If first time through, see if need to call setpun

```
IF(XCOL.GT.0) THEN
  WRITE(*,105)
105  FORMAT(/1X,'Reset run parameters? (y/n): ', $)
  READ(*,'(A1)') YORN
ELSE
  YORN='Y'
ENDIF
```

C-----Set run parameters: x,y,z cols, data grid, etc.

```
31 IF ((YORN.EQ.'Y').OR.(YORN.EQ.'y')) THEN
  CALL SETBLK

  ELSEIF((YORN.NE.'N').AND.(YORN.NE.'n')) THEN
    WRITE(*,*) 'answer Y or N only.....'
    WRITE(*,'(7X,A11,$)') 'try again: '
    READ(*,'(A1)') YORN
    GOTO 31
  ENDIF
```

C-----Ask for how to define neighbor search

```
CALL DEFBNEIGH(.FALSE.)
```

C-----Get output file

```
CALL GETOUT(OUT)
IF(OUT.NE.0) YESOUT=.TRUE.
```

C-----Calculate stats

```
CALL STATS
```

C-----Calculate block variance

```
CALL BLKVAR
```

C-----Start writing to output file

```
CALL TEXTBOUT(OUT)
WRITE(OUT,'(1X,A,A)') 'NB: Analysis includes only those ',
+ 'measured points within interpolation bounds'
IF(LOG.AND.(.NOT.HAAN)) WRITE(OUT,'(5X,A,A)') 'Neither ',
+ 'measured nor interpolated values are backtransformed'
WRITE(OUT,290)
290 FORMAT(1X,4X,'X',10X,'Y',12X,'Est Z',8X,'Std Dev',
+      11X,'Neighbors')
```

```

C-----Give first part of status report
      IF(YESOUT) THEN
        Q=CHAR(8)
        WRITE(*,'(1X,A25,A24,$)' ) ' ...calculating block',
+
        IF(TWODIM) WRITE(*,602) ' '
602      FORMAT(A8,$)
      ENDIF

C-----Initialize stat accumulators
      JJ=0

C-----Initialize x and y offset coordinates (to find block center)
      XMID=GXMN+0.5*(GXMAX-GXMN)
      XOFF=XMID-(0.5*NXBL*WIDTH)-(0.5*WIDTH)
      YMID=GYMN+0.5*(GYMAX-GYMN)
      YOFF=YMID-(0.5*NYBL*WIDTH)-(0.5*WIDTH)

C=====C
C                                     C
C          START OF MAIN BLOCK LOOP          C
C                                     C
C=====C

C-----Work through grid by blocks; start in southeast corner
      DO 100 I=1,NXBL
        XBL=XOFF+I*WIDTH

        DO 100 J=1,NYBL
          YBL=YOFF+J*WIDTH
          ZE=-99.
          ZV=-99.
          ZS=-99.

C-----Status report to screen
          JJ=JJ+1
          IF(YESOUT) THEN
            IF (.NOT.TWODIM) THEN
              WRITE(*,600) (Q,K=1,24),XBL,JJ,NXBL
600            FORMAT(24A,F7.1,' (' ,I5,' of ' ,I5,')', $)
            ELSE
              WRITE(*,601) (Q,K=1,32),XBL,YBL,JJ,NXBL*NYBL
601            FORMAT(32A,F7.1,' ,',F7.1,' (' ,I5,' of ' ,I5,')', $)
            ENDIF
          ENDIF

C-----Get nearest Maxnbr neighbors to center of block
76      CALL GETBNBRS(XBL,YBL,NNBRS,NBRLOC)
          IF(NNBRS.EQ.0) GOTO 99

C-----Determine covar between each sample and the current block
          COV(1,1)=XBL
          COV(2,1)=YBL
          NNBR1=NNBRS+1
          DO 240 K=1,NNBRS
            IP=NBRLOC(K)
            COV(1,2)=X(IP)
            COV(2,2)=Y(IP)
            CALL BLCOV(COV,VOC)
            RV(K)=VOC
            GV(K)=VOC
            AV((K-1)*NNBR1+NNBR1)=1.0
            AV((NNBR1-1)*NNBR1+K)=1.0
240      CONTINUE
          AV(NNBR1*NNBR1)=0.0

C-----Determine covar among samples in block neighborhood
      DO 250 K=1,NNBRS
        IP=NBRLOC(K)
        DO 260 L=K,NNBRS
          IP1=NBRLOC(L)
          DISTX=X(IP)-X(IP1)
          DISTY=Y(IP)-Y(IP1)
          H=DSQRT(DISTX**2+DISTY**2)

```

```

        GMH=GAMMAB(H)
        AV((K-1)*NNBR1+L)=GMH
        AV((L-1)*NNBR1+K)=GMH
260      CONTINUE
250      CONTINUE
        RV(NNBR1)=1.0

C-----Go for the simultaneous equations
        CALL SIMULB(RV,AV,NNBR1,1,IER)
        IF (IER.NE.0) GOTO 99

C-----Calculate krig estimate and variance
        ZV=0.0
        ZE=0.0
        DO 490 K=1,NNBRS
            IP=NBRLC(K)
            ZE=ZE+Z(IP)*RV(K)
            ZV=ZV+GV(K)*RV(K)
490      CONTINUE
        ZV=RV(NNBR1)+ZV-BLVAR

C-----If variance negative, set values to -99.
        IF(ZV.LT.0) THEN
            ZE=-99.
            ZS=-99.
        ELSE
C-----Backtransform ZE and ZV as per Haan (1977) if HAAN
            IF(LOG.AND.HAAN) THEN
                ZE=DEXP(ZE+0.5*ZV)-OFF
                ZV=UZMN**2*(DEXP(TZVAR))*(1-DEXP(-ZV))
            ENDIF
            ZS=DSQRT(ZV)
        ENDIF

C-----Write results to output
99      IF(TWODIM) THEN
            WRITE(OUT,460) XBL,YBL,ZE,ZS,NNBRS
        ELSE
            WRITE(OUT,462) XBL,ZE,ZS,NNBRS
        ENDIF

460      FORMAT(1X,G10.4,1X,G10.4,1X,G16.5,1X,G16.5,1X,I5)
462      FORMAT(1X,G10.4,1X,G16.5,1X,G16.5,1X,I5)

C=====C
C                                     C
C             END OF MAIN BLOCK LOOP          C
C                                     C
C=====C

C-----Go back to top and get new block coordinates
100     CONTINUE

        WRITE(OUT,*)
        WRITE(OUT,*)

        RETURN

999     END

C*****
C*****

SUBROUTINE SETBLK

    IMPLICIT REAL*8 (A-H,O-Z)
    REAL*4      DATA
    INTEGER     XCOL,YCOL,ZCOL
    CHARACTER*1  YORN,ANSW,HEAD1,HEAD2,HEAD3,HEAD4
    CHARACTER*64 FILNAM,OUTFIL,LSTOUT,HRDFIL,FTITLE,ZLABEL
    LOGICAL     TWODIM,CHECK,BOUND,HERC,LOG,HAAN,THERE

    COMMON/DATAIN/DATA(1000,15)
    COMMON/DATACOLS/X(1000),Y(1000),Z(1000)
    COMMON/FILINFO/FILNAM,OUTFIL,LSTOUT,FTITLE,NCOL,NROW,
+      HEAD1(79),HEAD2(79),HEAD3(79),HEAD4(79)
    COMMON/GENPARAM/NR,NRGRID,TWODIM,HERC,CHECK,HAAN,LOG,BOUND,

```

```

+      OFF,XCOL,YCOL,ZCOL,ZLABEL,TZMN,TZVAR,UZMN,UZVAR,
+      BZMN,BZVAR,XMIN,XMAX,YMIN,YMAX,GXMIN,GXMAX,
+      GYMIN,GYMAX,NRTOT
COMMON/BLKPARAM/RNBHD,RNBMAX,MAXNBR,MODEL,C0,C9,A9,
+      WIDTH,NXBL,NYBL,BLVAR

```

C-----Get the number of dimensions

```

WRITE(*,*)
WRITE(*,'(A38,$)') ' Enter number of dimensions (1 or 2): '
5  READ(*,*,IOSTAT=IERR) N
   IF((IERR.NE.0).OR.((N.NE.1).AND.(N.NE.2))) THEN
     WRITE(*,'(4X,A,$)') 'enter 1 or 2 only: '
     GOTO 5
   ELSEIF(N.EQ.1) THEN
     TWODIM=.FALSE.
   ELSEIF (N.EQ.2) THEN
     TWODIM=.TRUE.
   ENDIF

```

C-----Ask user for column numbers for X, Y, and Z and get z label

```

1  IF(.NOT.TWODIM) THEN
   WRITE(*,'(A38,$)') ' column numbers for X,Z: '
2  READ(*,*,IOSTAT=IERR) XCOL,ZCOL
   IF(IERR.NE.0) THEN
     WRITE(*,650)
     GOTO 2
   ENDIF
   YCOL=XCOL
   IF ((XCOL.GT.NCOL).OR.(ZCOL.GT.NCOL)) THEN
     WRITE(*,*) ' value out of range...'
     WRITE(*,'(1X,A,$)') ' re-enter: '
     GOTO 2
   ENDIF
ELSE
   WRITE(*,'(A38,$)') ' column numbers for X,Y,Z: '
3  READ(*,*,IOSTAT=IERR) XCOL,YCOL,ZCOL
   IF(IERR.NE.0) THEN
     WRITE(*,650)
     GOTO 3
   ENDIF
   IF ((XCOL.GT.NCOL).OR.(YCOL.GT.NCOL).OR.(ZCOL.GT.NCOL)) THEN
     WRITE(*,*) ' value out of range...'
     WRITE(*,'(1X,A,$)') ' re-enter: '
     GOTO 3
   ENDIF
ENDIF
WRITE(*,'(A,$)') ' label for Z: '
READ(*,'(A20)') ZLABEL
WRITE(*,*)

```

C-----Put data from proper columns into work arrays

```

K=0
DO 15 I=1,NROW
  IF (DATA(I,XCOL).EQ.-99.0) GOTO 15
  IF (TWODIM.AND.(DATA(I,YCOL).EQ.-99.0)) GOTO 15
  IF (DATA(I,ZCOL).EQ.-99.0) GOTO 15
  K=K+1
  X(K)=DATA(I,XCOL)
  Y(K)=0
  IF(TWODIM) Y(K)=DATA(I,YCOL)
  Z(K)=DATA(I,ZCOL)
15 CONTINUE
IF(K.LE.2) THEN
  WRITE(*,700)
700 FORMAT(14X,'too few valid data in these columns.....',/)
  GOTO 1
ENDIF
NRTOT=K

```

C-----See if user wants only subset of dataset  
CALL BOUNDS

C-----See if user wants a logarithmic transformation of Z  
CALL TRANSFORM

C-----Determine interpolation grid boundaries (not dataset bounds)  
CALL INTBOUNDS(.FALSE.)

```

C-----Determine block size
18  WRITE(*, '(4X,A,$)') 'Enter block width: '
16  READ(*, *, IOSTAT=IERR) WIDTH
    IF((IERR.NE.0).OR.(WIDTH.LE.0)) THEN
        WRITE(*,650)
        GOTO 16
    ENDIF
C-----Determine no of blocks across and up interpolation grid
    GXLEN=DABS(GXMAX-GXMIN)
    GYLEN=DABS(GYMAX-GYMIN)
    NXBL=NINT((GXLEN/WIDTH)+0.49)
    NYBL=NINT((GYLEN/WIDTH)+0.49)
    IF(TWODIM) THEN
        WRITE(*,424) NXBL,NYBL
    ELSE
        WRITE(*,425) NXBL
    ENDIF
424  FORMAT(4X,'Kriged area will be',I3,' blocks wide (E-W) x',
+       I3,' long (N-S);')
425  FORMAT(4X,'Kriged area will be',I3,' blocks long;')
    WRITE(*, '(4X,A,$)') 'Respecify width? (y/n): '
19  READ(*, '(A1)') YORN
    IF ((YORN.EQ.'Y').OR.(YORN.EQ.'y')) THEN
        GOTO 18
    ELSEIF ((YORN.NE.'N').AND.(YORN.NE.'n')) THEN
        WRITE(*,655)
        GOTO 19
    ENDIF
    WRITE(*,*)

C-----Get the Semivariogram model
    CALL DEFMODEL

    RETURN

C-----Error trapping code
650  FORMAT(4X,'numeric input only: ', $)
655  FORMAT(4X,'entry error; try again: ', $)
    END

C*****
C*****

SUBROUTINE BOUNDS

C-----Gets bounds for data set; see INTBOUNDS for interpolation bounds

    IMPLICIT REAL*8 (A-H,O-Z)
    INTEGER      XCOL,YCOL,ZCOL
    CHARACTER*1  YORN
    CHARACTER*64 ZLABEL
    LOGICAL      TWODIM,CHECK,BOUND,HERC,LOG,HAAN

    COMMON/DATACOLS/X(1000),Y(1000),Z(1000)
    COMMON/GENPARAM/NR,NRGRID,TWODIM,HERC,CHECK,HAAN,LOG,BOUND,
+       OFF,XCOL,YCOL,ZCOL,ZLABEL,TZMN,TZVAR,UZMN,UZVAR,
+       BZMN,BZVAR,XMIN,XMAX,YMIN,YMAX,GXMIN,GXMAX,
+       GYMIN,GYMAX,NRTOT

C-----Determine Xmin,XMAX,Ymin,Ymax (if onedim, all y(i)'s = 0)
    XMIN=X(1)
    XMAX=X(1)
    YMIN=Y(1)
    YMAX=Y(1)
    IF(.NOT.TWODIM) THEN
        DO 10 I=2,NRTOT
            XMIN=DMIN1(XMIN,X(I))
            XMAX=DMAX1(XMAX,X(I))
10      CONTINUE
    ELSE
        DO 20 I=2,NRTOT
            XMIN=DMIN1(XMIN,X(I))
            XMAX=DMAX1(XMAX,X(I))
            YMIN=DMIN1(YMIN,Y(I))
            YMAX=DMAX1(YMAX,Y(I))
20      CONTINUE

```

```

ENDIF
49 TXMIN=XMIN
TXMAX=XMAX
TYMIN=YMIN
TYMAX=YMAX
NRTMP=NRTOT
BOUND=.FALSE.

C-----Write bounds to screen
50 IF(TWODIM) THEN
    WRITE(*,*)'X-Y bounds for dataset:'
    WRITE(*, '(4X,A3,F11.3,A3,F11.3)') 'X: ',TXMIN,' ',TXMAX
    WRITE(*, '(4X,A3,F11.3,A3,F11.3)') 'Y: ',TYMIN,' ',TYMAX
ELSE
    WRITE(*,*)'Bounds for dataset:'
    WRITE(*, '(4X,A3,F11.3,A3,F11.3)') 'X: ',TXMIN,' ',TXMAX
ENDIF
WRITE(*,250) NRTMP
250 FORMAT (4X,'Number of valid points: ',I4)

C-----See if user wants subset
WRITE(*, '(4X,A,$)') 'Respecify bounds? (y/n): '
45 READ(*, '(A1)') YORN
46 IF ((YORN.EQ.'Y').OR.(YORN.EQ.'y')) THEN
    WRITE(*,220)
220 FORMAT(7X,'Enter min X and max X (2 values): ', $)
16 READ(*,*, IOSTAT=IERR) TXMIN, TXMAX
    IF((IERR.NE.0).OR.(TXMIN.GE.TXMAX)) THEN
        WRITE(*,650)
        GOTO 16
    ENDIF
    IF(TXMIN.LT.XMIN) TXMIN=XMIN
    IF(TXMAX.GT.XMAX) TXMAX=XMAX

    IF (TWODIM) THEN
        WRITE(*,230)
230 FORMAT(7X,'Enter min Y and max Y (2 values): ', $)
17 READ(*,*, IOSTAT=IERR) TYMIN, TYMAX
        IF((IERR.NE.0).OR.(TYMIN.GE.TYMAX)) THEN
            WRITE(*,650)
            GOTO 17
        ENDIF
        IF(TYMIN.LT.YMIN) TYMIN=YMIN
        IF(TYMAX.GT.YMAX) TYMAX=YMAX
    ENDIF

C-----See if >3 points fall within specified range
C NB if onedim all Y(L)'s = 0, as does TYMIN, TYMAX
NRTMP=0
DO 15 L=1,NRTOT
    IF ((X(L).GE.TXMIN).AND.(X(L).LE.TXMAX).AND.
        (Y(L).GE.TYMIN).AND.(Y(L).LE.TYMAX)) NRTMP=NRTMP+1
+
15 CONTINUE
    IF(NRTMP.LE.2) THEN
        WRITE(*,150) NRTMP,CHAR(7),CHAR(7)
150 FORMAT(14X,'...too few data (' ,I2,' ) within range.....',
+
        A,A)
        WRITE(*,*)
        GOTO 49
    ENDIF
    GOTO 50

ELSEIF ((YORN.EQ.'N').OR.(YORN.EQ.'n')) THEN
C-----Fill X,Y,Z vectors if boundaries changed
    IF((XMIN.NE.TXMIN).OR.(XMAX.NE.TXMAX).OR.(YMIN.NE.TYMIN)
+
        .OR.(YMAX.NE.TYMAX)) THEN
        XMIN=TXMIN
        XMAX=TXMAX
        YMIN=TYMIN
        YMAX=TYMAX
        K=0
        DO 35 L=1,NRTOT
            IF ((X(L).GE.XMIN).AND.(X(L).LE.XMAX).AND.
+
                (Y(L).GE.YMIN).AND.(Y(L).LE.YMAX)) THEN
                K=K+1
                X(K)=X(L)
                Y(K)=Y(L)

```

```

      Z(K)=Z(L)
      ENDIF
35      CONTINUE
      BOUND=.TRUE.
      NRTMP=K
      ENDIF
      NR=NRTMP

      ELSE
      WRITE(*,*) ' answer either y or n.....'
      WRITE(*, '(4X,A,$)') 'try again: '
      GOTO 45
      ENDIF

      WRITE(*,*)
999  RETURN

C-----Error trapping code
650  FORMAT(7X,'entry error.....',/14X,'try again: ', $)

      END

C*****
C*****

      SUBROUTINE TRANSFORM

      IMPLICIT REAL*8 (A-H,O-Z)
      INTEGER      XCOL,YCOL,ZCOL
      CHARACTER*1   YORN
      CHARACTER*64  ZLABEL
      LOGICAL       TWODIM,CHECK,BOUND,HERC,LOG,HAAN

      COMMON/DATACOLS/X(1000),Y(1000),Z(1000)
      COMMON/GENPARAM/NR,NRGRID,TWODIM,HERC,CHECK,HAAN,LOG,BOUND,
+      OFF,XCOL,YCOL,ZCOL,ZLABEL,TZMN,TZVAR,UZMN,UZVAR,
+      BZMN,BZVAR,XMIN,XMAX,YMIN,YMAX,GXMIN,GXMAX,
+      GYMIN,GYMAX,NRTOT

20  WRITE(*,105)
105  FORMAT(' Transform Z to logn(z)? (y/n): ', $)
31  READ(*, '(A1)') YORN
      IF ((YORN.EQ.'N').OR.(YORN.EQ.'n')) THEN
      LOG=.FALSE.
      HAAN=.FALSE.
      ELSEIF ((YORN.EQ.'Y').OR.(YORN.EQ.'y')) THEN
      LOG=.TRUE.
      WRITE(*,106)
106  FORMAT(' Specify a in the expression Z=ln(z+a): ', $)
22  READ(*,*, IOSTAT=IERR) OFF
      IF(IERR.NE.0) THEN
      WRITE(*,650)
      GOTO 22
      ENDIF

      IF((OFF.LT.0).OR.(OFF.GT.9999)) THEN
      WRITE(*,650)
      GOTO 22
      ENDIF

C-----Count points out of range in SPECIFIED data grid (not entire)
      NOUTS=0
      DO 15 I=1,NR
      IF(Z(I)+OFF.LT.1.0) NOUTS=NOUTS+1
15  CONTINUE
      IF(NOUTS.GT.0) THEN
      IF(NR-NOUTS.LT.3) THEN
      WRITE(*,150) NR-NOUTS
150  FORMAT(4X,'too few data (',I2,
+      ' ) are >1 before log-n transformation.....')
      WRITE(*, '(4X,A,A,$)') ' continue with ',
+      'transformation? (y/n): '
      GOTO 31
      ELSE
      WRITE(*,100) NOUTS
100  FORMAT(4X,'N.BG. ',I4,
+      ' Z-values are out of range (<1.0) and')

```

```

101      WRITE(*,101) NR-NOUTS
      FORMAT(4X,' will be ignored; there remain',14,
+         ' values;')
16      WRITE(*,102)
102      FORMAT(4X,' is this ok? (y/n): ', $)
      READ(*,'(A1)') YORN
      IF((YORN.NE.'Y').AND.(YORN.NE.'y')) GOTO 20
      WRITE(*,*)
      ENDIF
      ENDIF

```

```

107      WRITE(*,107)
      FORMAT(' Specify if want [H]aan or [N]o '
+         'backtransformation: ', $)
21      READ(*,'(A1)') YORN
      IF ((YORN.EQ.'H').OR.(YORN.EQ.'h')) THEN
          HAAN=.TRUE.
      ELSEIF ((YORN.EQ.'N').OR.(YORN.EQ.'n')) THEN
          HAAN=.FALSE.
      ELSE
          WRITE(*,'(7X,A24,$)') 'answer H or N only.....'
          GOTO 21
      ENDIF

```

C-----Transform data in work arrays

```

      K=0
      DO 18 I=1,NR
          IF(Z(I)+OFF.LT.1.0) GOTO 18
          K=K+1
          X(K)=X(I)
          Y(K)=Y(I)
          Z(K)=DLOG(Z(I)+OFF)
18      CONTINUE
      NR=K
      ELSE
          WRITE(*,'(4X,A,$)') ' answer y or n only: '
          GOTO 31
      ENDIF
      WRITE(*,*)
      RETURN

```

C-----Error trapping code

```

650      FORMAT(7X,'value out of range.....',/14X,'try again: ', $)
      END

```

```

C*****
C*****

```

SUBROUTINE INTBOUNDS(EARLY)

```

      IMPLICIT REAL*8 (A-H,O-Z)
      INTEGER      XCOL,YCOL,ZCOL
      CHARACTER*1   YORN
      CHARACTER*64  ZLABEL
      LOGICAL       TWODIM,CHECK,BOUND,HERC,LOG,HAAN,EARLY

      COMMON/DATACOLS/X(1000),Y(1000),Z(1000)
      COMMON/GENPARAM/NR,NRGRID,TWODIM,HERC,CHECK,HAAN,LOG,BOUND,
+         OFF,XCOL,YCOL,ZCOL,ZLABEL,TZMN,TZVAR,UZMN,UZVAR,
+         BZMN,BZVAR,XMIN,XMAX,YMIN,YMAX,GXMIN,GXMAX,
+         GYMIN,GYMAX,NRTOT

```

C-----Set grid boundaries to dataset bounds

```

      GXMIN=XMIN
      GXMAX=XMAX
      GYMIN=YMIN
      GYMAX=YMAX

```

C-----If early quit after setting gxmax=xmax, etc.

```

      IF(EARLY) THEN
          NRGRID=0
          RETURN
      ENDIF

```

C-----Write bounds to screen

```

55  GXLEN=ABS(GXMAX-GXMIN)
    GYLEN=ABS(GYMAX-GYMIN)
    WRITE(*,*) 'Interpolation Bounds: --Min--      --Max--',
+             '      --Length--'
    IF(TWODIM) THEN
        WRITE(*, '(17X,3(A3,F11.3))') 'X: ', GXMIN, ' ', GXMAX,
+             ' ', GYLEN
        WRITE(*, '(17X,3(A3,F11.3))') 'Y: ', GYMIN, ' ', GYMAX,
+             ' ', GYLEN
    ELSE
        WRITE(*, '(17X,3(A3,F11.3))') 'X: ', GXMIN, ' ', GXMAX,
+             ' ', GYLEN
    ENDIF

C-----See how many measured points are within interpolation grid
NRGRID=0
DO 15 I=1,NR
    IF(TWODIM) THEN
        IF((Y(I).GE.GYMIN).AND.(Y(I).LE.GYMAX).AND.
+         (X(I).GE.GXMIN).AND.(X(I).LE.GXMAX)) NRGRID=NRGRID+1
    ELSE
        IF((X(I).GE.GXMIN).AND.(X(I).LE.GXMAX)) NRGRID=NRGRID+1
    ENDIF
15  CONTINUE
    WRITE(*,250) NRGRID
250  FORMAT (4X,'Number of measured points within bounds: ',I4)

    IF(NRGRID.EQ.0) THEN
        YORN='Y'
        WRITE(*,*) 'Respecify bounds:'
    ELSE
        WRITE(*, '(4X,A,$)') 'Respecify bounds? (y/n): '
        READ(*, '(A1)') YORN
    ENDIF
45  IF ((YORN.EQ.'Y').OR.(YORN.EQ.'y')) THEN
        WRITE(*,220)
220    FORMAT(7X,'Enter min X and max X (2 values): ', $)
        16  READ(*,*, IOSTAT=IERR) GXMIN, GXMAX
            IF(IERR.NE.0) THEN
                WRITE(*,605)
                GOTO 16
            ENDIF
            IF (TWODIM) THEN
                WRITE(*,230)
230    FORMAT(7X,'Enter min Y and max Y (2 values): ', $)
                17  READ(*,*, IOSTAT=IERR) GYMIN, GYMAX
                    IF((IERR.NE.0).OR.(GYMIN.GE.GYMAX)) THEN
                        WRITE(*,605)
                        GOTO 17
                    ENDIF
            ENDIF
            GOTO 55

        ELSEIF ((YORN.NE.'N').AND.(YORN.NE.'n')) THEN
            WRITE(*,*) '      answer either y or n.....'
            WRITE(*, '(7X,A,$)') 'try again: '
            READ(*, '(A1)') YORN
            GOTO 45
        ENDIF

    WRITE(*,*)
999  RETURN

C-----Error trapping code
605  FORMAT(7X,'value(s) out of range.....',/14X,'try again: ', $)

END

C*****
C*****
SUBROUTINE DEFBMODEL

IMPLICIT REAL*8 (A-H,O-Z)
CHARACTER*64 HRDFIL
LOGICAL      HRDGRD, JACK, SELF

```

```

COMMON/BLKPARAM/RNBHD,RNBMAX,MAXNBR,MODEL,C0,C9,A9,
+          WIDTH,NXBL,NYBL,BLVAR

WRITE(*,400)
400 FORMAT(1X,'Specify semivariogram model;',/1X,
+ 'Models available:',/1X,
+ '1 - Linear to range',/1X,
+ 'for H(i) < A, ',
+ 'Gamma(i) = C0+[(C-C0)/A]*H(i)',/1X,
+ '> A, ',
+ 'Gamma(i) = C',/1X,
+ '2 - Spherical',/1X,
+ 'for H < A, ',
+ 'Gamma(i) = C0+(C-C0)*[1.5*(H(i)/A)',
+ '-(0.5*(H(i)/A)**3)]',/1X,
+ '> A, ',
+ 'Gamma(i) = C',/1X,
+ '3 - Exponential',/1X,
+ 'Gamma(i) = C0+(C-C0)*[1-EXP(-H(i)/Ao)]',/1X,
+ '4 - Gaussian',/1X,
+ 'Gamma(i) = C0-(C-C0)*',
+ '[1-EXP(-H(i)**2/(Ao/3**.5)**2)]')
WRITE(*,'(1X,A17,$)') 'Enter Choice: '
28 READ(*,*,IOSTAT=IERR) MODEL
IF(IERR.NE.0) THEN
  WRITE(*,605)
  GOTO 28
ENDIF

C9=0
C0=0
A9=0
IF ((MODEL.GE.1).OR.(MODEL.LE.4)) THEN
  WRITE(*,'(4X,A,$)') 'Enter C0 (nugget variance): '
34 READ(*,*,IOSTAT=IERR) C0
IF(IERR.NE.0) THEN
  WRITE(*,605)
  GOTO 34
ENDIF
  WRITE(*,'(4X,A,$)') 'C (sill): '
36 READ(*,*,IOSTAT=IERR) C9
IF(IERR.NE.0) THEN
  WRITE(*,605)
  GOTO 36
ENDIF
  IF (MODEL.LT.3) THEN
    WRITE(*,'(4X,A,$)') 'A (range): '
  ELSE
    WRITE(*,'(4X,A,$)') 'Ao: '
  ENDIF
38 READ(*,*,IOSTAT=IERR) A9
IF(IERR.NE.0) THEN
  WRITE(*,605)
  GOTO 38
ENDIF

ELSE
  WRITE(*,605)
  GOTO 28
ENDIF

WRITE(*,*)
RETURN

C-----Error trapping code
605 FORMAT(7X,'value out of range.....',/14X,'try again: ', $)

END

C*****
C*****

SUBROUTINE DEFBNEIGH(EARLY)

IMPLICIT REAL*8 (A-H,O-Z)
INTEGER XCOL,YCOL,ZCOL
CHARACTER*64 HRDFIL,ZLABEL

```

```

LOGICAL      TWODIM,CHECK,BOUND,HERC,LOG,HAAN,EARLY

COMMON/GENPARAM/NR,NRGRID,TWODIM,HERC,CHECK,HAAN,LOG,BOUND,
+             OFF,XCOL,YCOL,ZCOL,ZLABEL,TZMN,TZVAR,UZMN,UZVAR,
+             BZMN,BZVAR,XMIN,XMAX,YMIN,YMAX,GXMIN,GXMAX,
+             GYMIN,GYMAX,NRTOT

COMMON/BLKPARAM/RNBHD,RNBMAX,MAXNBR,MODEL,C0,C9,A9,
+             WIDTH,NXBL,NYBL,BLVAR

C-----Define maximum neighborhood search radius
DISTX=XMAX-XMIN
DISTY=YMAX-YMIN
IF(.NOT.TWODIM) THEN
  RNBMAX=DSQRT(DISTX**2)
ELSE
  RNBMAX=DSQRT(DISTX**2+DISTY**2)
ENDIF
WRITE(*,*) 'Neighborhood Definition'
WRITE(*,210) RNBMAX
210  FORMAT(1X,'Maximum neighborhood radius is ',G12.3,':')
RNBHD=RNBMAX
MAXNBR=MIN(NR-1,100)
IF(EARLY) GOTO 999

WRITE(*,560)
42  READ(*,*,ERR=630) TRNBHD
560  FORMAT(1X,' specify maximum search radius: ', $)
IF(TRNBHD.LE.0) GOTO 630
IF(TRNBHD.LT.RNBHD) RNBHD=TRNBHD
WRITE(*,*)

C-----Define max no. of neighbors to include in neighborhood search
MAXNBR=MIN(NR,100)
WRITE(*,552) MAXNBR
552  FORMAT(1X,'Number of potential neighbors for any search: ',
+         13)
WRITE(*,550) MIN(100,MAXNBR)
550  FORMAT(1X,' specify maximum (to ',13,'): ', $)
32  READ(*,*,ERR=620) MAXNBR
IF(MAXNBR.LT.1) GOTO 620
IF(MAXNBR.GT.100) THEN
  WRITE(*,*)' .....n set to 100;'
  MAXNBR=100
ENDIF
IF(MAXNBR.GT.NR) MAXNBR=NR

999  WRITE(*,*)
      RETURN

C-----Error trapping code
620  WRITE(*,650)
      GOTO 32
630  WRITE(*,650)
      GOTO 42
650  FORMAT(4X,'value out of range.....',/4X,'try again: ', $)

END

C*****
C*****

SUBROUTINE STATS

IMPLICIT REAL*8 (A-H,O-Z)
INTEGER      XCOL,YCOL,ZCOL
LOGICAL      TWODIM,CHECK,HERC,LOG,HAAN,BOUND
CHARACTER*64 ZLABEL

COMMON/DATACOLS/X(1000),Y(1000),Z(1000)
COMMON/GENPARAM/NR,NRGRID,TWODIM,HERC,CHECK,HAAN,LOG,BOUND,
+             OFF,XCOL,YCOL,ZCOL,ZLABEL,TZMN,TZVAR,UZMN,UZVAR,
+             BZMN,BZVAR,XMIN,XMAX,YMIN,YMAX,GXMIN,GXMAX,
+             GYMIN,GYMAX,NRTOT

C-----NB: STATS is called AFTER transformations
C      TZMN, TZVAR = transformed general mean and var of z

```

C UZMN, UZVAR = untransformed

C-----Calculate stats

```
SUMZ=0
SUMZ2=0
DO 10 I=1,NR
  SUMZ=SUMZ+Z(I)
  SUMZ2=SUMZ2+Z(I)**2
10 CONTINUE
```

C-----Calculate mean, variance

```
T=DBLE(NR)
TZMN=SUMZ/T
IF(T.GT.1) TZVAR=(SUMZ2-(T*TZMN**2))/(T-1)
```

C-----If transformed, get untransformed mean, var

```
IF(LOG) THEN
  SUMZ=0
  SUMZ2=0
  DO 20 I=1,NR
    SUMZ=SUMZ+DEXP(Z(I))-OFF
    SUMZ2=SUMZ2+(DEXP(Z(I))-OFF)**2
20 CONTINUE
  UZMN=SUMZ/T
  IF(T.GT.1) UZVAR=(SUMZ2-(T*UZMN**2))/(T-1)
  IF(HAAN) THEN
    BZMN=DEXP(TZMN+0.5*TZVAR)-OFF
    BZVAR=(UZMN**2)*(DEXP(TZVAR)-1)
  ELSE
    BZMN=DEXP(TZMN)-OFF
    BZVAR=DEXP(TZVAR)
  ENDIF
ELSE
  UZMN=TZMN
  UZVAR=TZVAR
ENDIF
```

```
RETURN
END
```

C\*\*\*\*\*  
C\*\*\*\*\*

SUBROUTINE GETOUT(OUT)

C Gets name of output file, opens

```
IMPLICIT REAL*8 (A-H,O-Z)
INTEGER XCOL,YCOL,ZCOL,OUT
CHARACTER*1 YORN,HEAD1,HEAD2,HEAD3,HEAD4
CHARACTER*64 FILNAM,OUTFIL,FTITLE,ZLABEL,LSTOUT
LOGICAL TWODIM,THERE,OPEND,CHECK,HERC,LOG,HAAN,BOUND

COMMON/FILINFO/FILNAM,OUTFIL,LSTOUT,FTITLE,NCOL,NROW,
+ HEAD1(79),HEAD2(79),HEAD3(79),HEAD4(79)
COMMON/GENPARAM/NR,NRGRID,TWODIM,HERC,CHECK,HAAN,LOG,BOUND,
+ OFF,XCOL,YCOL,ZCOL,ZLABEL,TZMN,TZVAR,UZMN,UZVAR,
+ BZMN,BZVAR,XMIN,XMAX,YMIN,YMAX,GXMIN,GXMAX,
+ GYMIN,GYMAX,NRTOT
```

C-----Get output filename

```
10 OUT=6
  INQUIRE (OUT,OPENED=OPEND,NAME=LSTOUT)
  WRITE(*,100)
100 FORMAT(' Output file ([N]one, [A]ppend, or filename): ',%)
  READ(*,'(A64)') OUTFIL
  IF ((OUTFIL.EQ.'N').OR.(OUTFIL.EQ.'n')) THEN
    OUTFIL='NONE'
    CLOSE(OUT)
    OUT=0
  ELSEIF ((OUTFIL.EQ.'A').OR.(OUTFIL.EQ.'a')) THEN
    IF (.NOT.OPEND) THEN
      WRITE(*,*) ' there''s no output file to append to...'
      GOTO 10
    ELSE
      OUTFIL=LSTOUT
      WRITE(OUT,'(//////////)')
```

```

      ENDIF
    ELSE
      INQUIRE(FILE=OUTFIL,EXIST=THEORE)
      INQUIRE(OUT,OPENED=OPEND)
      IF (THEORE) THEN
        WRITE(*,110)
        FORMAT(' File exists;')
110      +      /3X,'Do you want to write over it? (y/n): ', $)
12      +      READ(*,'(A1)') YORN
        IF ((YORN.EQ.'N').OR.(YORN.EQ.'n')) THEN
          GOTO 10
        ELSEIF ((YORN.NE.'Y').AND.(YORN.NE.'y')) THEN
          WRITE(*,115)
115      +      FORMAT(' answer either y or n: ', $)
          GOTO 12
        ENDIF
      ENDIF
      IF (OPEND) CLOSE(OUT)
      OPEN(OUT,FILE=OUTFIL,STATUS='NEW',IOSTAT=IERR)
      IF(IERR.NE.0) GOTO 600
    ENDIF

    WRITE(*,*)
70    RETURN

C-----Error trapping
600  WRITE(*,*) '...file error.....',CHAR(7),CHAR(7)
      WRITE(*,*)
      GOTO 10

    END

C*****
C*****

SUBROUTINE TEXTBOUT(OUT)

  IMPLICIT REAL*8 (A-H,O-Z)
  INTEGER      XCOL,YCOL,ZCOL,OUT
  CHARACTER*1  HEAD1,HEAD2,HEAD3,HEAD4,Q
  CHARACTER*64 FILNAM,OUTFIL,LSTOUT,HRDFIL,FTITLE,ZLABEL
  LOGICAL      TWODIM,CHECK,BOUND,HERC,LOG,HAAN,
+             HRDGRD,JACK,SELF,NBANAL

  COMMON/FILINFO/FILNAM,OUTFIL,LSTOUT,FTITLE,NCOL,NROW,
+             HEAD1(79),HEAD2(79),HEAD3(79),HEAD4(79)
  COMMON/GENPARAM/NR,NRGRID,TWODIM,HERC,CHECK,HAAN,LOG,BOUND,
+             OFF,XCOL,YCOL,ZCOL,ZLABEL,TZMN,TZVAR,UZMN,UZVAR,
+             BZMN,BZVAR,XMIN,XMAX,YMIN,YMAX,GXMIN,GXMAX,
+             GYMIN,GYMAX,NRTOT
  COMMON/BLKPARAM/RNBHD,RNBMAX,MAXNBR,MODEL,C0,C9,A9,
+             WIDTH,NXBL,NYBL,BLVAR

C-----Start writing to output file
  WRITE(OUT,*) 'Block Kriging Output'
  IF(FTITLE.NE.' ') WRITE(OUT,*) 'Run title: ',FTITLE
  WRITE(OUT,*) 'Input file: ',FILNAM
  WRITE(OUT,204) NCOL,NROW
204  FORMAT(1X,'( ',I2,' columns x ',I4,' rows)')
  IF(.NOT.TWODIM) THEN
    WRITE(OUT,208) XCOL,ZCOL
208  FORMAT(' X,Z Cols: ',I2,', ',I2)
  ELSE
    WRITE(OUT,210) XCOL,YCOL,ZCOL
210  FORMAT(' X,Y,Z Cols: ',I2,', ',I2,', ',I2)
  ENDIF
  IF(ZLABEL.NE.' ') WRITE(OUT,*) 'Z col label: ',ZLABEL
  WRITE(OUT,*) 'Defined Boundaries'
  WRITE(OUT,*) ' Data (Measured) Points'
  WRITE(OUT,660) XMIN,XMAX
  IF(TWODIM) WRITE(OUT,665) YMIN,YMAX
  WRITE(OUT,*) ' Interpolated Points'
  WRITE(OUT,660) GXMIN,GXMAX
  IF(TWODIM) WRITE(OUT,665) GYMIN,GYMAX
660  FORMAT(1X,' X:',G14.3,' - ',G14.3)
665  FORMAT(1X,' Y:',G14.3,' - ',G14.3)

```

```

WRITE(OUT,*) 'Number of Measured Points'
WRITE(OUT,215) NROW
WRITE(OUT,216) NRTOT
WRITE(OUT,217) NR
IF(.NOT.HRDGRD) WRITE(OUT,218) NRGRID
215 FORMAT(4X,'total in input dataset: ',I4)
216 FORMAT(4X,'total valid in dataset: ',I4)
217 FORMAT(4X,'within dataset bounds: ',I4)
218 FORMAT(4X,'within interpolation bounds: ',I4)

IF(LOG) THEN
  WRITE(OUT,*) 'Z-values log-n transformed:'
  WRITE(OUT,220) OFF
220  FORMAT('    Ln(x+a) where a =',F6.1)
ENDIF
WRITE(OUT,*) 'General Statistics'
WRITE(OUT,*) '(For all measured points within data boundaries)'
IF(.NOT.LOG) THEN
  WRITE(OUT,630) UZMN
  WRITE(OUT,635) UZVAR
  WRITE(OUT,640) UZVAR**0.5
  WRITE(OUT,645) NR
630  FORMAT(1X,'  Mean:      ',G14.4)
635  FORMAT(1X,'  Variance:  ',G14.4)
640  FORMAT(1X,'  Std. Dev:  ',G14.4)
645  FORMAT(1X,'  N:        ',I10)
ELSE
  IF(HAAN) THEN
    WRITE(OUT,725)
    FORMAT(14X,'Untransformed',3X,'Transformed',3X,
      'Backtransformed (Haan)')
  ELSE
    WRITE(OUT,726)
    FORMAT(14X,'Untransformed',3X,'Transformed',3X,
      'Backtransformed (Std)')
  ENDIF
  WRITE(OUT,730) UZMN,TZMN,BZMN
  WRITE(OUT,735) UZVAR,TZVAR,BZVAR
  WRITE(OUT,740) UZVAR**.5, TZVAR**.5, BZVAR**.5
  WRITE(OUT,745) NR,NR,NR
730  FORMAT(1X,'  Mean:      ',G14.4,1X,G14.4,1X,G14.4)
735  FORMAT(1X,'  Variance:  ',G14.4,1X,G14.4,1X,G14.4)
740  FORMAT(1X,'  Std. Dev:  ',G14.4,1X,G14.4,1X,G14.4)
745  FORMAT(1X,'  N:        ',I10,1X,I10,1X,I10)
ENDIF
WRITE(OUT,*)
WRITE(OUT,*(1X,A16,F10.3))'Block width: ',WIDTH
WRITE(OUT,*(1X,A16,F10.3))'  variance: ',BLVAR
WRITE(OUT,*)
WRITE(OUT,*) 'Neighborhood Definition'
WRITE(OUT,*) '  Parameter      Maximum      Used'
IF(JACK) THEN
  WRITE(OUT,225) NR-1,MAXNBR
ELSE
  WRITE(OUT,225) NR,MAXNBR
ENDIF
225  FORMAT(1X,'  No. of neighbors:',I5,9X,I5)
WRITE(OUT,226) RNBMAX,RNBHD
226  FORMAT(1X,'  Search radius:  ',G11.3,1X,G11.3)
WRITE(OUT,*)

WRITE(OUT,*) 'Semivariogram model'
IF (MODEL.EQ.1) THEN
  WRITE(OUT,*) 'Linear to range:'
  WRITE(OUT,*) '  for H(i) < A, Gamma(i)= C0+[(C-C0)/A]*H(i)'
  WRITE(OUT,*) '  > A, Gamma(i)= C'
ELSEIF(MODEL.EQ.2) THEN
  WRITE(OUT,*) 'Spherical:'
  WRITE(OUT,*) '  for H(i) < A, Gamma(i)= C0+(C-C0)*',
+    '[1.5*(H(i)/A)]'
  WRITE(OUT,*) '  > A, Gamma(i)= C'
ELSEIF(MODEL.EQ.3) THEN
  WRITE(OUT,*) 'Exponential'
  WRITE(OUT,*) '  Gamma(i)= C0+(C-C0)*[1-EXP(-H(i)/Ao)]'
ELSEIF(MODEL.EQ.4) THEN
  WRITE(OUT,*) 'Gaussian'
  WRITE(OUT,*) '  Gamma(i) =',

```

```

+   ' CO-(C-CO)*[1-EXP(-H(i)**2/(A/3**.5)**2)]'
ENDIF
WRITE(OUT,*)'                                where CO = ',SNGL(CO)
WRITE(OUT,*)'                                C = ',SNGL(C9)
IF(MODEL.LT.3) THEN
  WRITE(OUT,*)'                                A = ',SNGL(A9)
ELSE
  WRITE(OUT,*)'                                Ao = ',SNGL(A9)
ENDIF
WRITE(OUT,*)
WRITE(OUT,*) 'Interpolation Output'
IF(LOG) THEN
  IF(HAAN) THEN
    WRITE(OUT,*) 'N.B. Krige estimates backtransformed ',
+               '(Haan 1977)'
  ELSE
    WRITE(OUT,*) 'N.B. Krige estimates not backtransformed'
  ENDIF
ENDIF
RETURN
END

C*****
C*****

SUBROUTINE BLKVAR

  IMPLICIT REAL*8 (A-H,O-Z)
  DIMENSION COV(2,2)

  COMMON/BLKPARAM/RNBHD,RNBMAX,MAXNBR,MODEL,CO,C9,A9,
+               WIDTH,NXBL,NYBL,BLVAR

C-----Calculate the block variance
  VOC2=0.0
  WD2=WIDTH/2.
  WD4=WIDTH/4.
  WD8=WIDTH/8.
  DO 60 I=1,4
    DO 60 J=1,4
      COV(1,1)=WD2+(I-3)*WD4+WD8
      COV(2,1)=WD2+(J-3)*WD4+WD8
      COV(1,2)=WD2
      COV(2,2)=WD2
      CALL BLCOV(COV,VOC)
      VOC2=VOC2+VOC
60  CONTINUE
  BLVAR=VOC2/16.

END

C*****
C*****

SUBROUTINE BLCOV(B,VOC)

C-----Calculates the block covariance, i.e. covar between a sample and
C   a block

  IMPLICIT REAL*8 (A-H,O-Z)
  DIMENSION B(2,2)

  COMMON/BLKPARAM/RNBHD,RNBMAX,MAXNBR,MODEL,CO,C9,A9,
+               WIDTH,NXBL,NYBL,BLVAR

  VOC=0.0
  WD8=WIDTH/8.
  WD4=WIDTH/4.
  DO 10 I=1,4
    DO 10 J=1,4
      DISTX=B(1,2)-B(1,1)+(I-3)*WD4+WD8
      DISTY=B(2,2)-B(2,1)+(J-3)*WD4+WD8
      DISTX=DSQRT(DISTX**2)
      DISTY=DSQRT(DISTY**2)
      H=DSQRT(DISTX**2+DISTY**2)
      VOC=VOC+GAMMAB(H)
    
```

```

10  CONTINUE
    VOC=VOC/16.
    RETURN
    END

```

```

C*****
C*****

```

```

SUBROUTINE GETBNBRS(XPT,YPT,NNBRS,NBRLOC)

```

```

IMPLICIT REAL*8 (A-H,O-Z)
REAL*4      DIST(1000),DNEAR(100)
INTEGER      XCOL,YCOL,ZCOL,NBRLOC(100)
LOGICAL      TWODIM,LOG,HERC,CHECK,HAAN,HRDGRD,BOUND,JACK,SELF
CHARACTER*64 HRDFIL,ZLABEL

```

```

COMMON/DATACOLS/X(1000),Y(1000),Z(1000)
COMMON/GENPARAM/NR,NRGRID,TWODIM,HERC,CHECK,HAAN,LOG,BOUND,
+              OFF,XCOL,YCOL,ZCOL,ZLABEL,TZMN,TZVAR,UZMN,UZVAR,
+              BZMN,BZVAR,XMIN,XMAX,YMIN,YMAX,GXMIN,GXMAX,
+              GYMIN,GYMAX,NRTOT
COMMON/BLKPARAM/RNBHD,RNBMAX,MAXNBR,MODEL,C0,C9,A9,
+              WIDTH,NXBL,NYBL,BLVAR

```

```

C-----Find 100 or MAXNBR of nearest neighbors; reject distances > RNBHD;
C      if Jack=.true. XPT,YPT itself ignored (dist.le.1d-7)

```

```

C-----Create array DIST of distance of every element from block center
DO 110 I=1,NR
    DISTX=(XPT-X(I))**2
    DISTY=(YPT-Y(I))**2
    DIST(I)=SNGL((DISTX+DISTY)**0.5)
110  CONTINUE

```

```

C-----Create array NBRLOC(MAXNBR) of addresses of neighborhood points
C      array DNEAR holds distance for each address; jump out at maxnbrs
NNBRS=0
DO 130 I=1,NR
    IF((DIST(I).GT.RNBHD).OR.(JACK.AND.(DIST(I).LE.1D-7))) GOTO 130
    NNBRS=NNBRS+1
    NBRLOC(NNBRS)=I
    DNEAR(NNBRS)=DIST(I)
    IF(NNBRS.EQ.MAXNBR) GOTO 140
130  CONTINUE

```

```

C-----Do an initial sort on DNEAR
140  CALL SORT(DNEAR,NBRLOC,NNBRS)

```

```

C-----If no. of neighbors within neighborhood so far =maxneighbors, then
C      may be more neighbors out there within neighborhood. Now go
C      through remainder of data set to see which of remaining items
C      to include in DNEAR;
C      Since have already found the max no. of nearest neighbors, even
C      if future points are within the neighborhood radius they must be
C      less than the greatest radius thus far encountered to be included
C      as a neighbor; therefore no need to test whether that point is in
C      the neighborhood radius. If there are fewer points within the
C      neighborhood radius than the maxnbr of neighbors, there's no need
C      to sort further.

```

```

IF(NNBRS.EQ.MAXNBR) THEN
    DO 150 I=NNBRS+1,NR
        IF(DIST(I).GT.DNEAR(NNBRS)) GOTO 150
        IF(JACK.AND.(DIST(I).LE.1D-7)) GOTO 150
        NBRLOC(NNBRS)=I
        DNEAR(NNBRS)=DIST(I)
        CALL SORT(DNEAR,NBRLOC,NNBRS)
150    CONTINUE
ENDIF

```

```

RETURN
END

```

```

C*****
C*****

```

```

SUBROUTINE SORT(DATA1,DATA2,N)

```

C-----Generalized sort routine; sorts on Data1 for N elements; ascending  
 C must specify real or integer

```

REAL*4 DATA1(1),SAVE1
INTEGER DATA2(1),SAVE2

IF(N.GE.2) THEN
  DO 20 I=2,N
    DO 10 J=1,I-1
      IF(DATA1(I).GE.DATA1(J)) GOTO 10
      SAVE1=DATA1(I)
      DATA1(I)=DATA1(J)
      DATA1(J)=SAVE1
      SAVE2=DATA2(I)
      DATA2(I)=DATA2(J)
      DATA2(J)=SAVE2
    10 CONTINUE
  20 CONTINUE
ENDIF

RETURN
END

```

C\*\*\*\*\*  
 C\*\*\*\*\*

DOUBLE PRECISION FUNCTION GAMMAB(H)

```

IMPLICIT REAL*8 (A-H,O-Z)
COMMON/BLKPARAM/RNBHD,RNBMAX,MAXNBR,MODEL,C0,C9,A9,
+              WIDTH,NXBL,NYBL,BLVAR

```

C-----Determine the value GAMMAB  
 C NB: (1) For block.for there is not TZVAR;  
 C (2) Although if h.ge.A9 below evaluates to GAMMAB=C9,  
 C float point processing mandates using full equation  
 C to avoid crash

```

IF(MODEL.EQ.1) THEN
  IF (H.LT.A9) THEN
    GAMMAB=C0+((C9-C0)/A9)*H
  ELSE
    GAMMAB=C0+((C9-C0)/A9)*A9
  ENDIF

ELSEIF(MODEL.EQ.2) THEN
  IF(H.LT.A9) THEN
    GAMMAB=C0+(C9-C0)*(1.5*(H/A9)-0.5*((H/A9)**3))
  ELSE
    GAMMAB=C0+(C9-C0)*(1.5*(A9/A9)-0.5*((A9/A9)**3))
  ENDIF

ELSEIF(MODEL.EQ.3) THEN
  GAMMAB=C0+(C9-C0)*(1-DEXP(-H/A9))

ELSEIF(MODEL.EQ.4) THEN
  GAMMAB=C0-(C9-C0)*(1-DEXP(-(H**2/(A9/3**5)**2)))

ENDIF

999 RETURN
END

```

C\*\*\*\*\*  
 C\*\*\*\*\*

SUBROUTINE SIMULB(SOLNV,VMAT,NROWS,NCOLS,ISERR)

C-----Generic simultaneous equation subroutine; matrix (in vector  
 C form) VMAT with NROWS rows and NCOLS columns

```

IMPLICIT REAL*8 (A-H,O-Z)
DIMENSION VMAT(10201),SOLNV(101)

```

```

      IF(NROWS.LE.0) GOTO 23

C-----Find greatest element in matrix VMAT
      ISERR=0.
      PIVOT=0.
      NRSQ=NROWS*NROWS
      NM=NCOLS*NROWS
      DO 30 L=1,NRSQ
        UX=DABS(VMAT(L))
        IF((UX-PIVOT).GT.0) THEN
          PIVOT=UX
          I=L
        ENDIF
      30 CONTINUE
      TOL=PIVOT*1D-14

C-----VMAT(I) is pivot element
C      Start elimination
      LST=1
      DO 17 K=1,NROWS

C-----Test for singularity
      IF(PIVOT.LE.0) GOTO 23
      IF(ISERR.EQ.0) THEN
        IF((PIVOT-TOL).LE.0) ISERR=K-1
      ENDIF
      PIVTMP=1./VMAT(I)
      J=(I-1)/NROWS
      I=J*NROWS-K
      J=J+1-K

C-----I+K=row index, J+K column index of pivot
      DO 8 L=K,NM,NROWS
        LL=L+I
        UX=PIVTMP*SOLNV(LL)
        SOLNV(LL)=SOLNV(L)
      8   SOLNV(L)=UX

      IF((K-NROWS).GE.0) GOTO 18

C-----Column interchange
      LEND=LST+NROWS-K
      IF(J.LE.0) GOTO 12
      II=J*NROWS
      DO 11 L=LST,LEND
        UX=VMAT(L)
        LL=L+II
        VMAT(L)=VMAT(LL)
      11  VMAT(LL)=UX

C-----Row interchange
      12  DO 13 L=LST,NRSQ,NROWS
        LL=L+I
        UX=PIVTMP*VMAT(LL)
        VMAT(LL)=VMAT(L)
      13  VMAT(L)=UX

      VMAT(LST)=J

C-----Element reduction
      PIVOT=0.
      LST=LST+1
      J=0
      DO 16 II=LST,LEND
        PIVTMP=-VMAT(II)
        IST=II+NROWS
        J=J+1
        DO 15 L=IST,NRSQ,NROWS
          LL=L-J
          VMAT(L)=VMAT(L)+PIVTMP*VMAT(LL)
          UX=DABS(VMAT(L))
          IF((UX-PIVOT).LE.0) GOTO 15
          PIVOT=UX
          I=L
        15  CONTINUE
        DO 16 L=K,NM,NROWS
          LL=L+J
          SOLNV(LL)=SOLNV(LL)+PIVTMP*SOLNV(L)

```

17 LST=LST+NROWS

C-----End of elimination loop

C Back substitution and interchange

18 I=NROWS-1

IF(I.LT.0) THEN

GOTO 23

ELSEIF(I.EQ.0) THEN

GOTO 999

ENDIF

IST=NRSQ+NROWS

LST=NROWS+1

DO 21 I=2,NROWS

II=LST-I

IST=IST-LST

L=IST-NROWS

L=VMAT(L)+.5

DO 21 J=II,NM,NROWS

UX=SOLNV(J)

LL=J

DO 20 K=IST,NRSQ,NROWS

LL=LL+1

20 UX=UX-VMAT(K)\*SOLNV(LL)

K=J+L

SOLNV(J)=SOLNV(K)

21 SOLNV(K)=UX

999 RETURN

C-----ERROR RETURN

23 ISERR=-1

RETURN

END

```

C*****
C*****
C*****
C***** End of Block.for *****
C*****
C*****
C*****

```

## Block Kriging output file Block.out

## Block Kriging Output

Run title: Sample run: Block krig

Input file: Sample.prn

( 3 columns x 256 rows)

X,Y,Z Cols: 1, 2, 3

Z col label: Zvariate

## Defined Boundaries

## Data (Measured) Points

|    |      |   |      |
|----|------|---|------|
| X: | .200 | - | 79.9 |
| Y: | .000 | - | 79.4 |

## Interpolated Points

|    |      |   |      |
|----|------|---|------|
| X: | .200 | - | 79.9 |
| Y: | .000 | - | 79.4 |

## Number of Measured Points

total in input dataset: 256

total valid in dataset: 248

within dataset bounds: 248

within interpolation bounds: 248

## Z-values log-n transformed:

Ln(x+a) where a = 1.0

## General Statistics

(For all measured points within data boundaries)

|           | Untransformed | Transformed | Backtransformed (Haan) |
|-----------|---------------|-------------|------------------------|
| Mean:     | .3977         | .3242       | .3972                  |
| Variance: | .4575E-01     | .2054E-01   | .3284E-02              |
| Std. Dev: | .2139         | .1433       | .5730E-01              |
| N:        | 248           | 248         | 248                    |

Block width: 9.000  
variance: .013

## Neighborhood Definition

| Parameter         | Maximum | Used |
|-------------------|---------|------|
| No. of neighbors: | 248     | 32   |
| Search radius:    | 113.    | 113. |

## Semivariogram model

## Spherical:

for  $H(i) < A$ ,  $\text{Gamma}(i) = C0 + (C - C0) * [1.5 * (H(i)/A)]$   
 >  $A$ ,  $\text{Gamma}(i) = C$   
 where  $C0 = 1.223000E-002$   
 $C = 2.388000E-002$   
 $A = 67.4000000$

## Interpolation Output

N.B. Krig estimates backtransformed (Haan 1977)

NB: Analysis includes only those measured points within interpolation bounds

| X     | Y     | Est Z  | Std Dev    | Neighbors |
|-------|-------|--------|------------|-----------|
| 4.050 | 3.700 | .46586 | .45497E-02 | 32        |
| 4.050 | 12.70 | .45981 | .51034E-02 | 32        |
| 4.050 | 21.70 | .56957 | .39460E-02 | 32        |
| 4.050 | 30.70 | .56284 | .42379E-02 | 32        |
| 4.050 | 39.70 | .48219 | .42634E-02 | 32        |
| 4.050 | 48.70 | .42794 | .46395E-02 | 32        |
| 4.050 | 57.70 | .59150 | .41908E-02 | 32        |
| 4.050 | 66.70 | .42529 | .41011E-02 | 32        |
| 4.050 | 75.70 | .42511 | .57216E-02 | 32        |
| 13.05 | 3.700 | .36360 | .43491E-02 | 32        |
| 13.05 | 12.70 | .39530 | .36808E-02 | 32        |
| 13.05 | 21.70 | .42609 | .41374E-02 | 32        |
| 13.05 | 30.70 | .49415 | .44140E-02 | 32        |
| 13.05 | 39.70 | .48394 | .51906E-02 | 32        |
| 13.05 | 48.70 | .38028 | .35475E-02 | 32        |
| 13.05 | 57.70 | .42653 | .45741E-02 | 32        |
| 13.05 | 66.70 | .36980 | .40318E-02 | 32        |
| 13.05 | 75.70 | .53382 | .42825E-02 | 32        |
| 22.05 | 3.700 | .26696 | .55903E-02 | 32        |
| 22.05 | 12.70 | .24184 | .51751E-02 | 32        |
| 22.05 | 21.70 | .25311 | .40353E-02 | 32        |
| 22.05 | 30.70 | .20363 | .43857E-02 | 32        |
| 22.05 | 39.70 | .26198 | .38291E-02 | 32        |
| 22.05 | 48.70 | .40016 | .53946E-02 | 32        |
| 22.05 | 57.70 | .52241 | .43833E-02 | 32        |
| 22.05 | 66.70 | .34981 | .41509E-02 | 32        |
| 22.05 | 75.70 | .38165 | .42016E-02 | 32        |

|       |       |        |            |    |
|-------|-------|--------|------------|----|
| 31.05 | 3.700 | .20668 | .39233E-02 | 32 |
| 31.05 | 12.70 | .15555 | .45398E-02 | 32 |
| 31.05 | 21.70 | .15535 | .38454E-02 | 32 |
| 31.05 | 30.70 | .22233 | .46591E-02 | 32 |
| 31.05 | 39.70 | .22904 | .53551E-02 | 32 |
| 31.05 | 48.70 | .29200 | .42685E-02 | 32 |
| 31.05 | 57.70 | .23814 | .37448E-02 | 32 |
| 31.05 | 66.70 | .43219 | .44103E-02 | 32 |
| 31.05 | 75.70 | .20059 | .39754E-02 | 32 |
| 40.05 | 3.700 | .21486 | .46902E-02 | 32 |
| 40.05 | 12.70 | .20863 | .41117E-02 | 32 |
| 40.05 | 21.70 | .25605 | .49221E-02 | 32 |
| 40.05 | 30.70 | .25574 | .44884E-02 | 32 |
| 40.05 | 39.70 | .29365 | .39438E-02 | 32 |
| 40.05 | 48.70 | .33950 | .40117E-02 | 32 |
| 40.05 | 57.70 | .35914 | .51949E-02 | 32 |
| 40.05 | 66.70 | .38169 | .44430E-02 | 32 |
| 40.05 | 75.70 | .30198 | .50451E-02 | 32 |
| 49.05 | 3.700 | .22574 | .50342E-02 | 32 |
| 49.05 | 12.70 | .29065 | .54955E-02 | 32 |
| 49.05 | 21.70 | .42234 | .42988E-02 | 32 |
| 49.05 | 30.70 | .31701 | .39542E-02 | 32 |
| 49.05 | 39.70 | .30163 | .35378E-02 | 32 |
| 49.05 | 48.70 | .32119 | .49528E-02 | 32 |
| 49.05 | 57.70 | .39267 | .41866E-02 | 32 |
| 49.05 | 66.70 | .47397 | .48287E-02 | 32 |
| 49.05 | 75.70 | .43438 | .40315E-02 | 32 |
| 58.05 | 3.700 | .19644 | .43980E-02 | 32 |
| 58.05 | 12.70 | .21018 | .39721E-02 | 32 |
| 58.05 | 21.70 | .19843 | .51475E-02 | 32 |
| 58.05 | 30.70 | .34206 | .32641E-02 | 32 |
| 58.05 | 39.70 | .31223 | .48271E-02 | 32 |
| 58.05 | 48.70 | .24406 | .50115E-02 | 32 |
| 58.05 | 57.70 | .48925 | .40151E-02 | 32 |
| 58.05 | 66.70 | .46939 | .45747E-02 | 32 |
| 58.05 | 75.70 | .48811 | .48518E-02 | 32 |
| 67.05 | 3.700 | .32848 | .55666E-02 | 32 |
| 67.05 | 12.70 | .32230 | .38613E-02 | 32 |
| 67.05 | 21.70 | .29881 | .37960E-02 | 32 |
| 67.05 | 30.70 | .73168 | .39564E-02 | 32 |
| 67.05 | 39.70 | .66855 | .56101E-02 | 32 |
| 67.05 | 48.70 | .50951 | .37756E-02 | 32 |
| 67.05 | 57.70 | .49633 | .37947E-02 | 32 |
| 67.05 | 66.70 | .70230 | .39821E-02 | 32 |
| 67.05 | 75.70 | .76921 | .51138E-02 | 32 |
| 76.05 | 3.700 | .41477 | .56992E-02 | 32 |
| 76.05 | 12.70 | .42373 | .54190E-02 | 32 |
| 76.05 | 21.70 | .44370 | .47367E-02 | 32 |
| 76.05 | 30.70 | .51424 | .50012E-02 | 32 |
| 76.05 | 39.70 | .47327 | .46386E-02 | 32 |
| 76.05 | 48.70 | .50996 | .44133E-02 | 32 |
| 76.05 | 57.70 | .61693 | .59607E-02 | 32 |
| 76.05 | 66.70 | .73286 | .39922E-02 | 32 |
| 76.05 | 75.70 | .62508 | .57781E-02 | 32 |

Sample input file Sample.prn

File Sample.prn

Sample data for 2 dimensional geostat analysis

3 columns: Xcor, Ycor, Zvariate

Semivar model (r2=.95): spherical, C0=.01227, C=.02388, Ao=67.74

|      |      |      |
|------|------|------|
| 1.7  | 1.3  | 0.61 |
| 2.3  | 7.0  | 0.37 |
| 4.5  | 11.9 | 0.42 |
| 3.1  | 19.5 | 0.45 |
| 3.4  | 23.4 | 0.92 |
| 2.7  | 29.4 | 0.60 |
| 1.6  | 32.6 | 0.60 |
| 0.2  | 40.0 | 0.45 |
| 4.1  | 44.5 | 0.43 |
| 0.8  | 48.7 | 0.38 |
| 3.2  | 52.8 | 0.57 |
| 2.2  | 58.1 | 0.94 |
| 0.6  | 64.0 | 0.51 |
| 4.2  | 69.6 | 0.39 |
| 2.4  | 71.8 | 0.34 |
| 4.9  | 76.9 | 0.41 |
| 7.8  | 3.5  | 0.37 |
| 9.4  | 8.4  | 0.47 |
| 6.7  | 10.2 | 0.61 |
| 6.7  | 16.3 | 0.46 |
| 6.8  | 20.7 | 0.39 |
| 6.5  | 27.2 | 0.44 |
| 9.8  | 33.1 | 0.49 |
| 5.8  | 39.6 | 0.54 |
| 5.7  | 42.7 | 0.38 |
| 9.5  | 46.1 | 0.28 |
| 9.7  | 51.1 | 0.47 |
| 6.2  | 57.5 | 0.39 |
| 9.4  | 63.3 | 0.44 |
| 6.8  | 65.6 | 0.37 |
| 5.6  | 71.1 | 0.46 |
| 9.8  | 77.4 | 0.61 |
| 10.2 | 4.6  | 0.56 |
| 12.2 | 6.5  | 0.45 |
| 12.2 | 10.8 | 0.44 |
| 13.9 | 15.8 | 0.50 |
| 13.2 | 21.7 | 0.44 |
| 10.8 | 26.0 | 0.50 |
| 11.6 | 32.7 | 0.91 |
| 13.2 | 35.8 | 0.55 |
| 13.1 | 43.1 | 0.55 |
| 10.7 | 45.3 | 0.53 |
| 13.9 | 51.5 | 0.26 |
| 13.4 | 57.2 | 0.33 |
| 14.5 | 63.6 | 0.31 |
| 14.6 | 68.8 | 0.30 |
| 14.4 | 71.0 | 0.24 |
| 14.0 | 77.5 | 0.64 |
| 15.0 | 2.3  | 0.25 |
| 17.1 | 10.0 | 0.22 |
| 19.4 | 10.3 | 0.13 |
| 16.6 | 15.1 | 0.18 |
| 15.9 | 23.8 | 0.41 |
| 17.0 | 28.8 | 0.25 |
| 19.8 | 33.4 | 0.09 |
| 19.1 | 38.4 | 0.24 |
| 15.7 | 44.5 | 0.42 |
| 15.0 | 45.7 | 0.32 |
| 17.3 | 53.4 | 0.72 |
| 19.8 | 56.8 | 0.54 |
| 16.3 | 62.0 | 0.61 |
| 16.9 | 66.9 | 0.52 |
| 18.1 | 70.4 | 0.73 |
| 16.5 | 78.3 | 0.72 |
| 22.9 | 4.1  | 0.42 |
| 21.6 | 6.6  | 0.23 |
| 20.2 | 13.8 | 0.41 |
| 21.8 | 18.9 | 0.39 |
| 20.2 | 21.6 | 0.23 |
| 20.2 | 25.4 | 0.22 |
| 22.9 | 33.5 | 0.28 |

|      |      |        |
|------|------|--------|
| 22.7 | 37.4 | 0.21   |
| 22.7 | 40.5 | 0.27   |
| 24.6 | 46.0 | 0.34   |
| 24.4 | 50.0 | 0.36   |
| 21.0 | 58.7 | 0.90   |
| 22.4 | 62.9 | 0.13   |
| 22.1 | 69.3 | 0.23   |
| 21.7 | 74.1 | 0.33   |
| 24.3 | 76.6 | 0.16   |
| 28.9 | 2.1  | 0.06   |
| 29.7 | 8.2  | 0.12   |
| 29.4 | 14.8 | 0.07   |
| 26.9 | 19.8 | 0.14   |
| 28.0 | 21.8 | 0.16   |
| 29.3 | 27.2 | 0.23   |
| 25.0 | 32.0 | 0.22   |
| 25.9 | 38.6 | -99.00 |
| 27.7 | 44.3 | 0.25   |
| 27.7 | 48.9 | 0.37   |
| 28.0 | 53.1 | 0.24   |
| 28.1 | 58.3 | 0.26   |
| 27.0 | 62.9 | 0.44   |
| 27.3 | 67.0 | 0.42   |
| 26.2 | 73.3 | 0.54   |
| 26.8 | 79.2 | 0.28   |
| 32.6 | 3.2  | 0.21   |
| 31.7 | 6.0  | 0.41   |
| 30.3 | 10.7 | 0.17   |
| 34.0 | 18.4 | 0.18   |
| 33.6 | 23.4 | 0.15   |
| 32.2 | 27.1 | -99.00 |
| 31.1 | 34.3 | 0.27   |
| 33.2 | 37.8 | 0.16   |
| 33.8 | 44.0 | 0.29   |
| 34.1 | 46.1 | 0.39   |
| 34.1 | 52.6 | 0.15   |
| 32.1 | 58.8 | 0.13   |
| 31.5 | 61.1 | 0.34   |
| 33.4 | 67.4 | 0.42   |
| 32.9 | 74.8 | 0.02   |
| 30.8 | 78.6 | 0.08   |
| 38.0 | 4.2  | 0.38   |
| 39.1 | 5.0  | 0.17   |
| 39.1 | 11.9 | 0.23   |
| 35.3 | 18.2 | 0.14   |
| 38.0 | 23.0 | 0.13   |
| 35.4 | 29.9 | 0.15   |
| 36.6 | 31.6 | 0.25   |
| 36.5 | 36.4 | 0.37   |
| 38.2 | 42.5 | 0.18   |
| 39.6 | 48.8 | 0.34   |
| 37.0 | 52.4 | 0.47   |
| 39.1 | 56.4 | 0.39   |
| 39.1 | 63.6 | 0.46   |
| 35.2 | 69.9 | 0.67   |
| 39.0 | 71.7 | 0.29   |
| 36.0 | 77.6 | 0.23   |
| 43.5 | 1.6  | 0.15   |
| 44.8 | 9.7  | 0.15   |
| 40.5 | 12.8 | 0.19   |
| 43.4 | 15.4 | 0.23   |
| 44.1 | 23.9 | 0.41   |
| 44.4 | 26.8 | 0.31   |
| 42.9 | 31.1 | 0.27   |
| 40.5 | 36.2 | 0.34   |
| 43.1 | 42.3 | 0.38   |
| 41.8 | 47.0 | 0.27   |
| 43.9 | 54.6 | -99.00 |
| 40.2 | 55.1 | -99.00 |
| 40.1 | 64.0 | 0.35   |
| 41.4 | 65.2 | 0.28   |
| 42.4 | 72.9 | 0.30   |
| 44.5 | 79.4 | 0.41   |
| 47.0 | 1.5  | 0.22   |
| 48.2 | 8.4  | 0.28   |
| 47.1 | 10.9 | 0.23   |
| 45.6 | 19.3 | 0.67   |

|      |      |        |
|------|------|--------|
| 46.9 | 22.1 | 0.67   |
| 48.5 | 25.8 | -99.00 |
| 47.1 | 31.0 | 0.25   |
| 47.4 | 39.2 | 0.20   |
| 49.8 | 40.9 | 0.40   |
| 49.2 | 45.2 | 0.49   |
| 45.6 | 54.8 | 0.31   |
| 46.8 | 56.7 | 0.29   |
| 46.6 | 62.9 | 0.39   |
| 49.3 | 66.0 | 0.49   |
| 46.8 | 73.4 | 0.52   |
| 46.0 | 77.6 | 0.39   |
| 50.9 | .0   | 0.24   |
| 54.8 | 8.8  | 0.24   |
| 55.0 | 12.5 | 0.19   |
| 54.5 | 17.0 | 0.35   |
| 53.3 | 20.8 | 0.24   |
| 50.7 | 26.4 | 0.18   |
| 51.7 | 30.7 | 0.49   |
| 51.8 | 38.0 | 0.20   |
| 54.0 | 40.3 | 0.32   |
| 51.9 | 46.6 | 0.31   |
| 50.8 | 52.3 | 0.23   |
| 50.1 | 56.2 | 0.32   |
| 52.8 | 63.5 | 0.94   |
| 50.2 | 66.3 | -99.00 |
| 51.4 | 74.4 | 0.31   |
| 52.8 | 76.1 | 0.63   |
| 56.9 | 2.9  | 0.19   |
| 56.5 | 7.6  | 0.17   |
| 58.2 | 12.4 | 0.21   |
| 57.7 | 18.5 | 0.18   |
| 57.2 | 20.3 | 0.19   |
| 58.0 | 29.9 | 0.25   |
| 55.2 | 30.4 | 0.71   |
| 56.1 | 35.5 | 0.30   |
| 56.1 | 42.5 | 0.22   |
| 56.1 | 48.8 | 0.20   |
| 56.6 | 54.8 | 0.12   |
| 56.6 | 56.2 | 0.71   |
| 59.7 | 60.9 | 0.32   |
| 59.3 | 67.0 | 0.17   |
| 56.2 | 72.7 | 0.22   |
| 59.8 | 79.2 | 0.33   |
| 61.5 | 0.6  | 0.15   |
| 61.6 | 5.8  | -99.00 |
| 64.2 | 13.7 | 0.15   |
| 63.0 | 16.7 | 0.19   |
| 64.4 | 23.3 | 0.17   |
| 61.2 | 29.2 | 0.18   |
| 61.6 | 31.5 | 0.33   |
| 60.2 | 35.0 | 0.33   |
| 60.9 | 44.1 | 0.27   |
| 64.6 | 48.7 | 0.31   |
| 63.1 | 53.7 | 0.61   |
| 62.7 | 57.3 | 0.72   |
| 60.5 | 62.7 | 0.45   |
| 60.4 | 65.5 | 0.65   |
| 62.0 | 71.6 | 1.14   |
| 64.4 | 76.8 | 1.00   |
| 65.1 | 3.5  | 0.39   |
| 69.5 | 8.3  | 0.40   |
| 68.5 | 13.3 | 0.49   |
| 68.0 | 17.3 | 0.40   |
| 67.6 | 24.7 | 0.45   |
| 69.8 | 28.7 | 0.52   |
| 65.9 | 31.2 | 1.50   |
| 66.7 | 35.3 | -99.00 |
| 67.4 | 41.6 | 0.85   |
| 66.2 | 47.0 | 0.79   |
| 68.8 | 53.5 | 0.56   |
| 65.0 | 58.0 | 0.43   |
| 70.0 | 63.8 | 0.58   |
| 66.3 | 65.8 | 0.54   |
| 65.0 | 70.0 | 1.25   |
| 66.6 | 79.0 | 0.52   |
| 73.1 | 1.7  | 0.28   |

|      |      |      |
|------|------|------|
| 71.3 | 9.4  | 0.30 |
| 74.9 | 11.3 | 0.25 |
| 70.7 | 19.1 | 0.26 |
| 71.5 | 21.8 | 0.34 |
| 72.3 | 29.6 | 0.59 |
| 73.5 | 32.9 | 0.47 |
| 70.5 | 35.3 | 0.56 |
| 74.4 | 41.2 | 0.37 |
| 71.3 | 48.7 | 0.41 |
| 70.3 | 52.7 | 0.33 |
| 70.2 | 59.7 | 0.40 |
| 70.2 | 61.2 | 0.60 |
| 73.5 | 68.7 | 0.57 |
| 72.5 | 73.1 | 0.58 |
| 74.0 | 76.2 | 0.43 |
| 75.0 | 4.9  | 0.50 |
| 79.1 | 7.3  | 0.51 |
| 75.4 | 11.6 | 0.51 |
| 79.0 | 18.7 | 0.44 |
| 77.9 | 23.9 | 0.54 |
| 75.8 | 29.6 | 0.51 |
| 75.5 | 30.9 | 0.53 |
| 79.3 | 39.6 | 0.51 |
| 79.9 | 43.7 | 0.56 |
| 76.6 | 47.9 | 0.56 |
| 77.4 | 53.0 | 0.54 |
| 75.0 | 56.5 | 0.59 |
| 75.1 | 64.2 | 0.85 |
| 77.5 | 66.6 | 0.80 |
| 77.3 | 72.0 | 0.71 |
| 76.9 | 74.5 | 0.85 |
